# Supplementary material for: A natural calcite reference material for microbeam Sr isotope analysis
Source: Royal Society of Chemistry journal article supplement (doi:10.1039/d2ja00311b), 2022-12-08
Supplement: d2ja00311b2.xlsx [file d2ja00311b2.xlsx]

## Sheet: MNP01
SampleName	87Sr/86Sr	87Sr/86Sr_Corr'	SE	'84Kr/88Sr'	SE	'85Rb/88Sr'	SE	'88 Intens'	SE	'Kr84 (V)'	SE	'Rb85 (V)'	SE	'167Er2'	SE	'173Yb2'	SE
STD	0.709235	1.00004	1.87e-05	1.84249e-05	1.92e-06	3.30202e-06	5.94e-07	9.30984	0.0814	0.000172737	1.77e-05	3.19338e-05	5.44e-06	1.51902e-05	5.15e-06	1.02712e-05	5.32e-06
MNP	0.706192	0.706164	1.51e-05	2.80133e-05	7.84e-07	2.92242e-05	7.4e-07	14.3279	0.0798	0.000402124	1.13e-05	0.000415043	1e-05	4.00377e-05	5.43e-06	2.68718e-05	8.79e-06
MNP	0.706163	0.706136	1.51e-05	2.97661e-05	7.94e-07	3.90388e-05	7.25e-07	12.1289	0.0398	0.000362745	9.74e-06	0.000474588	8.29e-06	5.57165e-05	5.88e-06	6.04174e-05	8.07e-06
MNP	0.706197	0.70617	1.32e-05	2.70631e-05	7.77e-07	2.93968e-05	7.97e-07	13.1992	0.0758	0.000357287	1.02e-05	0.00039041	1.19e-05	4.32387e-05	5.7e-06	7.00139e-06	8.01e-06
MNP	0.706216	0.706188	1.46e-05	2.64557e-05	8.43e-07	3.49231e-05	9.33e-07	13.8094	0.0677	0.000367966	1.16e-05	0.000472502	1.18e-05	3.28059e-05	5.98e-06	2.5776e-05	8.06e-06
STD	0.70924	1.00003	1.66e-05	1.85639e-05	8.83e-07	5.16186e-06	5.11e-07	11.9627	0.0527	0.000221333	1.05e-05	6.15294e-05	6.13e-06	1.57814e-05	5.37e-06	4.41632e-06	4.97e-06
MNP	0.706173	0.70615	1.52e-05	2.82037e-05	9.13e-07	3.82172e-05	1.36e-06	12.4762	0.0473	0.000351107	1.16e-05	0.000470429	1.57e-05	4.20657e-05	5.59e-06	2.59887e-05	7.98e-06
MNP	0.706259	0.706236	1.71e-05	2.83864e-05	8.75e-07	2.47885e-05	6.62e-07	15.7692	0.268	0.000447109	1.36e-05	0.000388611	9.57e-06	5.10074e-05	5.76e-06	1.60549e-05	8.29e-06
MNP	0.706197	0.706173	1.46e-05	2.78364e-05	7e-07	2.66072e-05	8.33e-07	14.5188	0.0791	0.000406778	1.06e-05	0.000380068	1.08e-05	5.37599e-05	5.44e-06	3.06925e-05	8.25e-06
MNP	0.706201	0.706178	1.45e-05	3.72472e-05	9.19e-07	8.30532e-05	1.83e-06	10.7812	0.0526	0.000407169	1.01e-05	0.000890661	1.6e-05	4.68652e-05	5.57e-06	4.01856e-05	8.41e-06
STD	0.709227	1.00003	1.54e-05	1.99913e-05	8.44e-07	4.43682e-06	4.88e-07	11.726	0.0479	0.00023062	9.71e-06	5.26156e-05	5.73e-06	1.60225e-05	5.99e-06	-3.45845e-06	5.8e-06
MNP	0.706169	0.706149	1.36e-05	3.10522e-05	8.28e-07	8.79628e-06	4.64e-07	12.0518	0.0468	0.00037654	1.02e-05	0.000104534	5.45e-06	5.52863e-05	5.89e-06	2.28782e-05	7.89e-06
MNP	0.706169	0.706149	1.28e-05	2.19606e-05	6.55e-07	1.0403e-05	5.65e-07	15.8122	0.0733	0.000348911	1.04e-05	0.0001637	9.1e-06	4.5183e-05	5.27e-06	1.36554e-05	8.49e-06
MNP	0.706182	0.706162	1.66e-05	2.13659e-05	8.2e-07	1.51944e-05	7.16e-07	15.1754	0.137	0.000326821	1.3e-05	0.000227592	1.07e-05	2.95006e-05	5.43e-06	1.87261e-05	8.27e-06
MNP	0.706168	0.706148	1.53e-05	2.34611e-05	6.22e-07	1.4307e-05	7.27e-07	15.7968	0.153	0.000362445	1.01e-05	0.000228885	1.18e-05	4.16904e-05	6.48e-06	8.44797e-06	9.01e-06
STD	0.709233	1.00004	1.52e-05	1.83394e-05	8.48e-07	3.94357e-06	4.87e-07	10.9238	0.0764	0.000197116	9.23e-06	4.36e-05	5.31e-06	1.3521e-06	5.54e-06	-3.42522e-06	5.02e-06
MNP	0.706193	0.706168	1.33e-05	2.12204e-05	7.33e-07	2.48525e-05	6.25e-07	16.3664	0.0638	0.000352807	1.23e-05	0.000408643	1.04e-05	3.16285e-05	6.93e-06	2.07184e-05	9.25e-06
MNP	0.706194	0.706169	1.41e-05	1.99337e-05	6.64e-07	9.52451e-06	5.64e-07	18.4923	0.124	0.000375601	1.29e-05	0.00017625	1e-05	4.23193e-05	6.46e-06	2.7808e-05	8.57e-06
MNP	0.706178	0.706153	1.39e-05	2.37344e-05	7.74e-07	4.6583e-05	8.32e-07	14.5086	0.0747	0.000339671	1.11e-05	0.000670989	1.01e-05	2.83792e-05	5.62e-06	-8.30374e-06	7.8e-06
MNP	0.706194	0.70617	1.54e-05	3.67406e-05	8.7e-07	4.40128e-05	7.34e-07	10.9606	0.0586	0.000405217	9.58e-06	0.000489139	6.99e-06	3.40322e-05	5.59e-06	-7.24781e-06	9.09e-06
STD	0.709237	1	1.4e-05	1.66391e-05	8.95e-07	4.8168e-06	5.85e-07	10.831	0.0636	0.000182821	9.74e-06	5.0037e-05	6.45e-06	-8.88662e-06	5.98e-06	-2.02265e-05	6.17e-06
MNP	0.706206	0.706204	1.4e-05	2.10607e-05	7.12e-07	4.47365e-05	1.4e-06	15.0609	0.0684	0.000320609	1.09e-05	0.000677525	2.15e-05	1.49362e-05	5.84e-06	-2.34953e-05	7.04e-06
MNP	0.706169	0.706167	1.46e-05	2.0408e-05	6.84e-07	2.87516e-05	6.57e-07	15.7387	0.0927	0.000322761	1.09e-05	0.000450196	1.03e-05	1.38434e-05	5.5e-06	-3.11728e-05	7.5e-06
MNP	0.706143	0.70614	1.35e-05	1.87631e-05	7.42e-07	1.27693e-05	5.26e-07	14.9173	0.0615	0.000279609	1.1e-05	0.000190127	7.84e-06	1.52041e-05	5.83e-06	-4.16419e-05	7.78e-06
MNP	0.706132	0.706129	1.73e-05	1.87041e-05	6.94e-07	1.57637e-05	7.42e-07	16.7325	0.122	0.000313565	1.13e-05	0.000272159	1.34e-05	3.20395e-05	6.66e-06	-2.09522e-05	8.19e-06
STD	0.709189	0.999987	1.45e-05	1.80791e-05	7.84e-07	5.1433e-06	4.36e-07	11.7014	0.0482	0.000209162	9.22e-06	6.35917e-05	5.29e-06	1.19292e-05	5.59e-06	1.53644e-05	5.54e-06
MNP	0.706161	0.706171	1.51e-05	2.20967e-05	1e-06	3.35944e-05	8.53e-07	12.5213	0.0907	0.000278122	1.18e-05	0.000419536	1.13e-05	2.723e-05	6.5e-06	8.8574e-06	7.95e-06
MNP	0.706194	0.706204	1.45e-05	2.9858e-05	9.1e-07	7.45689e-06	6.64e-07	10.5072	0.0451	0.000319639	1e-05	8.22145e-05	7.23e-06	4.36667e-05	5.77e-06	-2.60524e-05	7.82e-06
MNP	0.70619	0.706199	1.53e-05	3.19077e-05	9.5e-07	1.29451e-05	6.05e-07	9.92316	0.046	0.000314688	8.9e-06	0.000131917	5.98e-06	3.24922e-05	5.6e-06	2.33983e-05	8.35e-06
MNP	0.706212	0.706221	1.78e-05	3.10826e-05	9.36e-07	8.01707e-06	5.37e-07	10.7502	0.0561	0.00033459	1.03e-05	8.70774e-05	5.67e-06	4.17171e-05	5.45e-06	-1.06842e-05	7.91e-06
STD	0.709213	1.00001	1.39e-05	1.79125e-05	9.21e-07	4.42594e-06	5.66e-07	10.7891	0.0541	0.000196906	1.02e-05	4.77513e-05	6.1e-06	1.70976e-05	6.59e-06	-3.8963e-06	4.87e-06
MNP	0.70622	0.706216	1.7e-05	2.98402e-05	1e-06	1.0064e-05	5.76e-07	11.0739	0.0483	0.000330404	1.11e-05	0.000112312	6.34e-06	5.27446e-05	5.99e-06	-1.90037e-05	7.95e-06
MNP	0.706191	0.706187	1.37e-05	3.00516e-05	7.84e-07	4.0717e-05	1.68e-06	12.8256	0.0835	0.000384239	1.02e-05	0.00052261	2.17e-05	4.79369e-05	6.02e-06	-7.86305e-06	7.42e-06
MNP	0.706252	0.706247	1.31e-05	3.42043e-05	1.02e-06	2.03956e-05	6.06e-07	11.1098	0.0748	0.000380088	1.11e-05	0.000228613	6.3e-06	5.08635e-05	5.5e-06	1.85139e-06	6.98e-06
MNP	0.706208	0.706204	1.38e-05	2.66054e-05	8.13e-07	1.69378e-05	5.17e-07	14.1082	0.0703	0.000371293	1.16e-05	0.00023899	6.97e-06	2.81417e-05	5.26e-06	-3.62192e-05	6.57e-06
STD	0.709215	1.00002	1.45e-05	1.66796e-05	7.47e-07	3.08039e-06	5.12e-07	11.3811	0.0501	0.000194633	8.81e-06	3.54288e-05	5.82e-06	9.75798e-06	6.09e-06	-2.43658e-06	5.3e-06
MNP	0.7062	0.706185	1.5e-05	2.66146e-05	7.75e-07	1.95844e-05	5.85e-07	13.3315	0.0815	0.000351883	1.02e-05	0.000262224	7.41e-06	3.5553e-05	6.29e-06	-1.65785e-05	7.89e-06
MNP	0.706176	0.70616	1.37e-05	2.43507e-05	6.72e-07	2.35103e-05	7.55e-07	14.1194	0.0655	0.000341778	9.45e-06	0.000330736	1.01e-05	4.28756e-05	5.95e-06	-1.57631e-05	7.67e-06
MNP	0.706177	0.706162	1.36e-05	2.52214e-05	7.2e-07	2.72938e-05	8.88e-07	13.5571	0.0516	0.000343874	1e-05	0.000370661	1.14e-05	2.76336e-05	5.78e-06	-2.79829e-05	6.6e-06
MNP	0.706181	0.706166	1.34e-05	2.80587e-05	8.51e-07	3.5728e-05	9.04e-07	13.1346	0.0601	0.000366844	1.13e-05	0.00047415	1.29e-05	4.33568e-05	5.81e-06	-1.92812e-05	7.67e-06
STD	0.709236	1.00003	1.56e-05	1.57703e-05	9.05e-07	4.63484e-06	5.51e-07	10.7696	0.0469	0.000171722	9.9e-06	4.86704e-05	5.87e-06	-1.42626e-05	5.37e-06	-9.91905e-06	5.9e-06
MNP	0.706231	0.70621	1.3e-05	3.13369e-05	7.71e-07	1.80777e-05	5.59e-07	13.2344	0.0653	0.000408491	1.03e-05	0.00023851	7.7e-06	3.44193e-05	6.1e-06	-2.00907e-05	6.48e-06
MNP	0.706171	0.706151	1.4e-05	2.80523e-05	7.36e-07	1.61485e-05	5.74e-07	13.1825	0.0545	0.00036529	9.36e-06	0.000212014	8.06e-06	2.75412e-05	5.63e-06	-1.90896e-05	7.16e-06
MNP	0.706192	0.706171	1.69e-05	3.28535e-05	9.23e-07	3.03434e-05	6.46e-07	10.6149	0.0577	0.000352	9.64e-06	0.000320586	6.9e-06	2.14724e-05	5.97e-06	-2.90643e-05	8.04e-06
MNP	0.706207	0.706186	1.68e-05	2.62339e-05	8.18e-07	2.41524e-05	6.44e-07	14.4846	0.0778	0.000380827	1.2e-05	0.000352268	8.84e-06	4.16913e-05	5.47e-06	-4.06549e-05	8.2e-06
STD	0.709226	1.00004	1.51e-05	1.82632e-05	8.52e-07	4.75854e-06	5.24e-07	11.0011	0.0403	0.000200964	9.37e-06	5.26112e-05	5.78e-06	-5.32643e-06	5.82e-06	-2.20357e-05	5.2e-06
MNP	0.706199	0.706168	1.44e-05	2.65758e-05	7.69e-07	2.43093e-05	7.71e-07	11.9279	0.0568	0.000316198	9.21e-06	0.000287484	9.17e-06	1.60703e-05	5.68e-06	-3.23629e-05	6.29e-06
MNP	0.706225	0.706194	1.41e-05	2.66096e-05	8.79e-07	1.91898e-05	6.12e-07	12.2272	0.0996	0.000327829	1.06e-05	0.000233021	6.93e-06	2.84959e-05	5.62e-06	-3.49829e-05	6.66e-06
MNP	0.706179	0.706148	1.18e-05	2.56669e-05	7.76e-07	1.47849e-05	6.59e-07	13.7721	0.054	0.000353623	1.08e-05	0.000204024	9.29e-06	1.9907e-05	5.83e-06	-3.20763e-06	6.14e-06
MNP	0.706195	0.706164	1.6e-05	2.83151e-05	9.99e-07	1.40374e-05	5.74e-07	12.0951	0.0481	0.000343646	1.21e-05	0.000171172	6.94e-06	1.46787e-05	6.08e-06	-1.06222e-05	6.5e-06
STD	0.709256	1.00004	1.57e-05	1.73159e-05	9.35e-07	1.59269e-06	5.81e-07	11.1209	0.0436	0.000190827	1.02e-05	1.90743e-05	6.43e-06	-7.72313e-06	5.38e-06	-1.37014e-05	5.52e-06
MNP	0.706198	0.706168	1.93e-05	3.9062e-05	1.19e-06	2.06142e-05	1.16e-06	8.47518	0.0477	0.000333526	1.06e-05	0.000171933	9.21e-06	1.98388e-05	6e-06	-2.043e-05	7.43e-06
MNP	0.706223	0.706193	1.52e-05	2.95621e-05	7.74e-07	1.51948e-05	6.49e-07	13.5578	0.0634	0.000402512	1.06e-05	0.000203957	8.52e-06	3.08526e-05	5.71e-06	-1.90841e-05	5.94e-06
MNP	0.706187	0.706157	1.51e-05	2.74838e-05	7.81e-07	2.98362e-05	1e-06	12.356	0.0553	0.000335471	9.61e-06	0.000369885	1.13e-05	2.33729e-05	6.06e-06	-3.14954e-05	6.87e-06
MNP	0.7062	0.706169	1.75e-05	2.21218e-05	7.64e-07	2.84679e-05	1.19e-06	12.3449	0.0944	0.000274586	9.66e-06	0.000338503	1.23e-05	1.98385e-05	6.07e-06	-4.81057e-05	6.55e-06
STD	0.709225	1.00002	1.52e-05	1.70814e-05	8.54e-07	2.37093e-06	5.1e-07	11.0877	0.0223	0.000188917	9.49e-06	2.64189e-05	5.67e-06	-2.11064e-05	5.78e-06	-1.60347e-05	5.39e-06
MNP	0.706179	0.706168	1.79e-05	3.0295e-05	1.03e-06	8.5572e-06	5.92e-07	10.0248	0.0506	0.000303831	1.04e-05	8.6001e-05	5.98e-06	2.11441e-05	5.56e-06	-3.69356e-05	6.7e-06
MNP	0.706191	0.70618	1.53e-05	1.3031e-05	9.32e-07	1.43815e-05	6.29e-07	18.7789	0.559	0.00021861	1.36e-05	0.000244803	7.79e-06	7.74741e-06	5.96e-06	-1.97342e-05	6.32e-06
MNP	0.706166	0.706155	1.46e-05	2.2698e-05	8.02e-07	5.37454e-05	5.84e-06	12.3335	0.03	0.000279148	9.86e-06	0.000629124	6.67e-05	1.01383e-05	5.53e-06	-3.0904e-05	6.96e-06
MNP	0.706166	0.706155	1.65e-05	2.5341e-05	8.95e-07	3.33916e-05	9.22e-07	12.3841	0.0489	0.000315079	1.12e-05	0.000406243	1.1e-05	2.6274e-05	5.48e-06	-2.98432e-05	6.53e-06
STD	0.709217	1.00003	1.57e-05	1.71757e-05	8.98e-07	3.8601e-06	5.02e-07	10.9632	0.0445	0.000182229	9.62e-06	4.3022e-05	5.52e-06	-1.9477e-05	5.66e-06	-2.02722e-05	5.48e-06
MNP	0.706187	0.706166	1.96e-05	4.06468e-05	1.26e-06	3.23915e-05	1.05e-06	6.61626	0.0183	0.000267047	8.27e-06	0.000213763	7e-06	-1.79431e-06	5.39e-06	-3.80531e-05	7.27e-06
MNP	0.706192	0.706171	1.51e-05	2.12852e-05	7.8e-07	1.95765e-05	9.35e-07	14.7096	0.0813	0.000311666	1.13e-05	0.000285174	1.25e-05	1.18613e-05	5.97e-06	-2.75156e-05	5.99e-06
MNP	0.706171	0.70615	1.64e-05	1.47498e-05	6.33e-07	2.63103e-05	7.76e-07	16.6916	0.0677	0.000246489	1.06e-05	0.000441485	1.38e-05	6.01768e-06	5.26e-06	-4.84578e-05	6.96e-06
MNP	0.706153	0.706132	1.53e-05	1.54408e-05	6.61e-07	5.4368e-05	1.91e-06	15.9473	0.0792	0.000248587	1.07e-05	0.000856879	2.83e-05	6.58511e-06	5.97e-06	-2.86683e-05	6.75e-06
STD	0.709245	1.00003	1.42e-05	2.01461e-05	9.13e-07	6.2349e-06	5.12e-07	11.0076	0.0444	0.000226556	1e-05	6.93183e-05	5.69e-06	1.46772e-05	5.51e-06	-4.89685e-06	5.67e-06
MNP	0.706193	0.706174	1.19e-05	1.43203e-05	7.45e-07	3.52758e-05	1.16e-06	17.6067	0.0684	0.000251902	1.31e-05	0.000618343	1.96e-05	1.91842e-05	5.85e-06	-8.89596e-06	6.41e-06
MNP	0.706155	0.706136	1.53e-05	1.56564e-05	6.35e-07	6.70185e-05	2.31e-06	17.0516	0.0759	0.000270066	1.1e-05	0.00113231	3.64e-05	1.94669e-05	5.69e-06	-1.62894e-05	5.77e-06
MNP	0.706193	0.706175	1.27e-05	2.38489e-05	6.31e-07	3.273e-05	6.4e-07	14.2794	0.084	0.000336577	9.06e-06	0.000457835	9.73e-06	3.48936e-05	5.32e-06	5.74219e-06	5.09e-06
MNP	0.706207	0.706188	1.3e-05	2.51914e-05	7.13e-07	3.43571e-05	6.93e-07	14.4158	0.0637	0.000365748	1.07e-05	0.000491921	9.99e-06	4.60364e-05	5.18e-06	1.39011e-05	6.13e-06
STD	0.709212	1.00002	1.51e-05	1.85903e-05	9.61e-07	4.76208e-06	5.2e-07	10.9216	0.0404	0.000201135	1.04e-05	5.31092e-05	5.72e-06	1.45736e-05	5.27e-06	3.48644e-07	5.95e-06
MNP	0.70617	0.706156	1.3e-05	1.59157e-05	5.82e-07	4.70398e-05	1.41e-06	17.9383	0.0949	0.000278206	1e-05	0.0008334	2.33e-05	3.36414e-05	5.79e-06	-1.52215e-05	5.39e-06
MNP	0.706182	0.706168	1.29e-05	2.60509e-05	7.15e-07	2.06724e-05	7.79e-07	12.7221	0.0487	0.000335404	9.25e-06	0.000257697	9.06e-06	3.26499e-05	4.94e-06	3.03307e-06	4.86e-06
MNP	0.706216	0.706202	1.55e-05	2.92585e-05	9.33e-07	6.83118e-05	2.91e-06	10.962	0.044	0.000318269	1.01e-05	0.000757708	3.4e-05	2.98577e-05	5.38e-06	1.45535e-05	6.5e-06
MNP	0.706201	0.706188	1.27e-05	2.1945e-05	6.22e-07	2.37977e-05	7.61e-07	14.9115	0.0591	0.000323355	9.03e-06	0.000352962	1.12e-05	3.19017e-05	6.1e-06	8.67973e-06	5.65e-06
STD	0.709235	1.00003	1.52e-05	1.78272e-05	9.3e-07	8.10721e-06	4.54e-07	10.0165	0.0611	0.000176853	9.18e-06	8.13637e-05	4.52e-06	-2.98174e-06	5.42e-06	-2.07954e-05	5.02e-06
MNP	0.706221	0.706202	1.34e-05	2.441e-05	7.47e-07	3.43414e-05	8.25e-07	13.6976	0.0673	0.000335723	1.03e-05	0.000468453	9.89e-06	3.11438e-05	5.81e-06	1.27419e-05	6e-06
MNP	0.706195	0.706175	1.48e-05	2.19441e-05	6.72e-07	1.4915e-05	8.64e-07	14.0431	0.0637	0.000302805	9.69e-06	0.0002124	1.25e-05	2.50619e-05	5.49e-06	4.79417e-06	5.97e-06
MNP	0.706193	0.706174	1.44e-05	2.2799e-05	6.84e-07	3.07588e-05	6.27e-07	12.9512	0.0675	0.000292622	8.71e-06	0.000406532	8.84e-06	3.38206e-05	5.64e-06	1.1764e-05	5.22e-06
MNP	0.706205	0.706185	1.22e-05	2.15399e-05	6.93e-07	2.32827e-05	1.17e-06	13.4621	0.0608	0.000288	9.27e-06	0.000328741	1.67e-05	2.79055e-05	5.45e-06	1.21028e-05	5.75e-06
STD	0.709224	1.00002	1.65e-05	1.62433e-05	8.05e-07	1.79328e-06	5.67e-07	11.1652	0.0468	0.000180499	8.89e-06	1.98228e-05	6.35e-06	1.93765e-06	5.75e-06	-1.55954e-05	5.62e-06
MNP	0.706201	0.706189	1.53e-05	2.27802e-05	8.07e-07	1.88845e-05	1.09e-06	12.7125	0.0479	0.00029015	1.04e-05	0.000240748	1.42e-05	2.86908e-05	5.78e-06	-6.58062e-06	5.43e-06
MNP	0.706201	0.706188	1.25e-05	2.21387e-05	6.72e-07	1.32663e-05	5.69e-07	13.1756	0.0584	0.000291382	8.86e-06	0.000176342	7.63e-06	3.02801e-05	6.16e-06	9.53929e-07	5.79e-06
MNP	0.70616	0.706148	1.51e-05	2.15941e-05	7.31e-07	4.05867e-05	1.62e-06	13.0148	0.0373	0.000281845	9.57e-06	0.000529071	2.12e-05	3.38597e-05	5.23e-06	-1.01938e-05	5.4e-06
MNP	0.706174	0.706161	1.43e-05	2.56116e-05	7.98e-07	1.95658e-05	7.37e-07	11.3594	0.0331	0.000289874	9.1e-06	0.000223219	8.29e-06	3.45803e-05	5.78e-06	1.54858e-06	5.87e-06
STD	0.709221	1.00003	1.55e-05	1.51444e-05	9.47e-07	6.72885e-06	5.31e-07	10.7437	0.0451	0.000162078	1.01e-05	7.39094e-05	5.96e-06	1.34579e-05	6.06e-06	-8.87747e-06	5.55e-06
MNP	0.706174	0.706157	1.49e-05	2.40369e-05	8.33e-07	1.80728e-05	7.57e-07	11.4413	0.0445	0.00027446	9.51e-06	0.000207833	8.93e-06	2.04364e-05	5.9e-06	-5.98932e-07	5.35e-06
MNP	0.706191	0.706173	1.45e-05	2.19984e-05	7.95e-07	2.66058e-05	8.11e-07	12.9276	0.0529	0.000282172	1.02e-05	0.000346273	1.07e-05	3.3721e-05	5.35e-06	-3.08941e-06	6.14e-06
MNP	0.706197	0.706179	1.64e-05	2.39227e-05	8.85e-07	3.00626e-05	9.84e-07	10.7748	0.0372	0.000256158	9.51e-06	0.000319998	1.12e-05	2.81226e-05	5.27e-06	-4.98098e-06	5.81e-06
MNP	0.706198	0.70618	1.49e-05	3.2214e-05	1.08e-06	9.81626e-06	5.34e-07	10.152	0.0449	0.000326702	1.09e-05	9.73064e-05	5.27e-06	3.30693e-05	5.38e-06	9.28469e-06	5.32e-06
STD	0.709235		1.56e-05	1.71833e-05	9.69e-07	1.85125e-05	9.02e-07	10.0897	0.0887	0.000173981	1e-05	0.000187417	9.42e-06	4.12917e-06	5.73e-06	-2.39688e-05	5.02e-06
STD	0.709237	1.00003	1.49e-05	2.10252e-05	8.7e-07	5.86333e-06	4.03e-07	13.0965	0.0657	0.000269842	1.12e-05	7.65928e-05	5.22e-06	1.59096e-05	6.01e-06	1.77333e-05	5.98e-06
MNP	0.706189	0.706165	1.3e-05	2.77182e-05	7.13e-07	3.55352e-05	1.24e-06	14.6489	0.0781	0.000410748	1.09e-05	0.000513969	1.83e-05	5.81329e-05	5.85e-06	3.67021e-05	8.2e-06
MNP	0.706193	0.706169	1.26e-05	2.33634e-05	6.3e-07	2.57028e-05	1e-06	18.7501	0.0843	0.000433934	1.19e-05	0.000486336	1.8e-05	3.23791e-05	5.22e-06	1.84828e-05	8.72e-06
MNP	0.706169	0.706145	1.2e-05	2.18309e-05	7.61e-07	1.24972e-05	5.37e-07	18.7113	0.092	0.000408439	1.41e-05	0.000235771	1.08e-05	4.26034e-05	6.49e-06	4.17083e-06	7.22e-06
MNP	0.706159	0.706135	1.26e-05	1.87106e-05	5.35e-07	1.09226e-05	4.09e-07	21.1536	0.106	0.000396785	1.13e-05	0.000228068	8.4e-06	3.59994e-05	5.38e-06	-8.49231e-06	7.36e-06
STD	0.709231	1.00003	1.45e-05	2.11143e-05	6.98e-07	5.68773e-06	4.05e-07	13.3903	0.0508	0.000283218	9.22e-06	7.48295e-05	5.37e-06	1.44777e-05	5.87e-06	1.59821e-05	5.59e-06
MNP	0.706192	0.706172	1.27e-05	2.68084e-05	6.12e-07	1.95382e-05	5.5e-07	17.8483	0.0752	0.000479304	1.12e-05	0.000350053	9.88e-06	5.99148e-05	5.74e-06	2.22393e-05	8.36e-06
MNP	0.706152	0.706132	1.38e-05	1.9892e-05	6.04e-07	5.44757e-06	2.96e-07	19.575	0.0744	0.000385521	1.16e-05	0.000106381	5.6e-06	4.23972e-05	5.77e-06	-2.50942e-05	7.36e-06
MNP	0.706202	0.706182	1.35e-05	2.60488e-05	6.7e-07	8.84223e-06	3.11e-07	15.8544	0.0751	0.000408225	1.04e-05	0.000139034	4.93e-06	4.97592e-05	4.9e-06	6.45251e-06	8.08e-06
MNP	0.706166	0.706146	1.39e-05	2.54637e-05	6.46e-07	1.29112e-05	4.14e-07	16.9243	0.104	0.000434881	1.11e-05	0.000218001	7.37e-06	4.49803e-05	6.33e-06	8.8851e-06	8.18e-06
STD	0.709229	0.999999	1.4e-05	1.92246e-05	7.6e-07	5.83895e-06	4.51e-07	13.3863	0.057	0.000260191	1.01e-05	7.80044e-05	6.17e-06	1.68198e-05	5.47e-06	5.57998e-07	5.32e-06
MNP	0.706155	0.706156	1.39e-05	2.8067e-05	5.98e-07	7.47914e-06	3.73e-07	15.4518	0.0811	0.000434785	9.78e-06	0.000114426	5.7e-06	5.60002e-05	5.6e-06	1.68529e-05	8.06e-06
MNP	0.706222	0.706222	1.29e-05	2.62652e-05	6.11e-07	6.70998e-06	3.8e-07	15.8163	0.0813	0.000413244	9.9e-06	0.000105326	5.99e-06	5.63281e-05	5.29e-06	7.50279e-06	7.5e-06
MNP	0.706182	0.706183	1.23e-05	2.93324e-05	6.43e-07	8.13633e-06	3.78e-07	14.8976	0.0791	0.000436214	9.9e-06	0.000120107	5.61e-06	3.61236e-05	6.16e-06	1.93771e-05	7.52e-06
MNP	0.706225	0.706225	1.65e-05	3.63732e-05	8.46e-07	1.12073e-05	5.17e-07	12.5092	0.0674	0.000449153	1.06e-05	0.000141446	6.38e-06	4.74342e-05	5.62e-06	3.92857e-05	7.9e-06
STD	0.70919	0.999976	1.29e-05	2.02335e-05	7.67e-07	6.54977e-06	4.2e-07	13.2297	0.0571	0.000266086	1.02e-05	8.75014e-05	5.61e-06	9.39847e-06	4.96e-06	-1.00614e-05	5.18e-06
MNP	0.706186	0.706203	1.51e-05	3.59427e-05	7.98e-07	1.05145e-05	4.53e-07	12.3603	0.0546	0.000440895	9.77e-06	0.000131554	5.64e-06	4.67042e-05	6.13e-06	9.02234e-06	8.37e-06
MNP	0.706166	0.706182	1.23e-05	2.64297e-05	6.87e-07	5.99562e-06	3.48e-07	16.0781	0.0784	0.000424907	1.09e-05	9.59039e-05	5.57e-06	3.77539e-05	6.13e-06	1.52826e-05	8.64e-06
MNP	0.706175	0.706192	1.33e-05	2.53468e-05	6.34e-07	8.0152e-06	3.34e-07	16.5807	0.0771	0.000414376	1.03e-05	0.00013489	5.61e-06	3.23143e-05	6.11e-06	-1.97317e-06	7.58e-06
STD	0.709197	1	1.42e-05	1.93582e-05	8.48e-07	3.88877e-06	4.28e-07	12.2248	0.0961	0.000236258	1.07e-05	4.46975e-05	5.24e-06	-6.60473e-06	5.51e-06	-1.15892e-05	6.01e-06
MNP	0.70616	0.706159	1.39e-05	3.46529e-05	8.87e-07	8.46564e-06	4.45e-07	12.6246	0.0408	0.000436251	1.12e-05	0.000106276	5.6e-06	5.91937e-05	5.26e-06	1.57504e-05	8.24e-06
MNP	0.7062	0.706199	1.24e-05	2.76459e-05	7.06e-07	6.4208e-06	4.15e-07	14.7492	0.0644	0.000402789	1.02e-05	9.30241e-05	6.02e-06	3.65278e-05	5.34e-06	6.52711e-06	8.43e-06
MNP	0.706161	0.70616	1.29e-05	2.0942e-05	5.39e-07	1.0826e-05	5.89e-07	20.0181	0.0848	0.000417801	1.09e-05	0.000213877	1.11e-05	3.20291e-05	5.15e-06	-4.79378e-07	8.01e-06
MNP	0.706171	0.70617	1.22e-05	2.18404e-05	5.55e-07	1.94961e-05	7.07e-07	18.1752	0.0734	0.000394853	1.03e-05	0.000352726	1.36e-05	4.16481e-05	5.3e-06	-1.37876e-05	8.61e-06
STD	0.709225	0.999995	1.48e-05	1.92938e-05	7.72e-07	6.95751e-06	4.45e-07	12.8108	0.0524	0.00024631	9.76e-06	8.9682e-05	5.76e-06	4.16616e-06	5.7e-06	4.05219e-06	5.22e-06
MNP	0.706188	0.706191	1.27e-05	2.26069e-05	5.97e-07	1.14763e-05	4.42e-07	17.5368	0.0856	0.000398001	1.08e-05	0.000203078	8.3e-06	3.79858e-05	5.9e-06	-3.00843e-05	7.74e-06
MNP	0.706177	0.70618	1.45e-05	2.96231e-05	7.93e-07	1.67636e-05	8.7e-07	13.4507	0.0434	0.000399549	1.09e-05	0.000224906	1.17e-05	3.83353e-05	5.54e-06	-4.82492e-07	7.15e-06
MNP	0.706169	0.706172	1.42e-05	2.985e-05	7.79e-07	2.092e-05	6.04e-07	13.4281	0.0428	0.000403521	1.08e-05	0.000279703	7.87e-06	3.68581e-05	5.66e-06	3.45275e-05	7.93e-06
MNP	0.706169	0.706172	1.39e-05	2.62427e-05	7.72e-07	2.40812e-05	1.09e-06	16.0803	0.0701	0.000420169	1.24e-05	0.000382464	1.7e-05	4.61112e-05	5.67e-06	4.94566e-06	8.73e-06
STD	0.709189	0.999989	1.4e-05	2.04068e-05	7.06e-07	8.5792e-06	4.53e-07	13.2439	0.0509	0.000269854	9.3e-06	0.000113233	5.97e-06	4.79438e-06	6.64e-06	5.98234e-06	5.1e-06
MNP	0.706181	0.706189	1.22e-05	2.71893e-05	5.95e-07	1.39716e-05	4.01e-07	15.9593	0.0852	0.000435418	9.73e-06	0.000219252	5.94e-06	3.38437e-05	5.44e-06	1.48174e-07	6.97e-06
MNP	0.706233	0.706241	1.41e-05	2.55739e-05	6.45e-07	5.37213e-05	2.23e-06	17.477	0.084	0.000452439	1.16e-05	0.00091628	3.67e-05	5.11627e-05	6.17e-06	1.66915e-05	8.87e-06
MNP	0.706165	0.706173	1.37e-05	2.75075e-05	7.88e-07	4.11107e-05	1.93e-06	16.271	0.0748	0.000455162	1.27e-05	0.00067462	3.09e-05	4.16291e-05	5.99e-06	2.50896e-05	7.74e-06
MNP	0.70616	0.706168	1.58e-05	2.67194e-05	6.91e-07	3.05931e-05	1.16e-06	17.6523	0.124	0.000467557	1.17e-05	0.000540048	2.08e-05	5.20953e-05	5.81e-06	4.53722e-05	7.2e-06
STD	0.709215	1.00001	1.58e-05	2.0454e-05	7.74e-07	6.4266e-06	5.41e-07	12.0311	0.125	0.000248051	9.49e-06	7.54677e-05	6.42e-06	1.26106e-05	5.76e-06	-5.9346e-06	5.24e-06
MNP	0.706187	0.706178	1.36e-05	3.37063e-05	7.46e-07	2.87425e-05	1.31e-06	12.9094	0.0582	0.000433668	9.76e-06	0.000335186	1.12e-05	5.43414e-05	6.25e-06	3.71501e-05	7.56e-06
MNP	0.706194	0.706185	1.25e-05	3.64003e-05	8.78e-07	1.4319e-05	5.06e-07	12.8805	0.0651	0.000469597	1.11e-05	0.000181725	6.43e-06	4.94148e-05	5.88e-06	5.14024e-05	7.38e-06
MNP	0.706191	0.706182	1.22e-05	2.24071e-05	6.44e-07	2.75801e-05	1.24e-06	18.149	0.0734	0.000410781	1.21e-05	0.000497355	2.09e-05	4.2603e-05	5.37e-06	4.61261e-05	7.46e-06
MNP	0.706184	0.706175	1.24e-05	2.01404e-05	6.1e-07	2.68425e-05	6.04e-07	19.8634	0.0927	0.000397271	1.21e-05	0.000524751	1.13e-05	3.81928e-05	5.47e-06	1.94202e-06	7.36e-06
STD	0.709223	1	1.46e-05	2.41692e-05	1.07e-06	8.257e-06	5.43e-07	10.6721	0.109	0.00025729	1.11e-05	8.82849e-05	5.85e-06	2.82537e-05	5.81e-06	6.14235e-06	5.71e-06
MNP	0.706195	0.706193	1.51e-05	2.89168e-05	6.84e-07	3.60394e-05	1.45e-06	14.9802	0.105	0.00043979	1.09e-05	0.000533527	1.83e-05	5.19763e-05	5.4e-06	3.25793e-05	8.13e-06
MNP	0.706165	0.706163	1.39e-05	3.47942e-05	9.14e-07	3.79019e-05	1.15e-06	12.9945	0.063	0.000438854	1.19e-05	0.00048896	1.47e-05	5.42075e-05	5.4e-06	3.95927e-05	8.2e-06
MNP	0.706167	0.706165	1.45e-05	2.9099e-05	8.62e-07	1.32953e-05	6.41e-07	12.9135	0.0653	0.000371462	1.13e-05	0.000174873	8.07e-06	4.53127e-05	5.6e-06	1.49402e-05	7.44e-06
MNP	0.706187	0.706186	1.27e-05	1.65146e-05	6.74e-07	3.95392e-05	1.06e-06	17.7325	0.0938	0.000296926	1.2e-05	0.000699616	1.67e-05	1.62132e-05	5.12e-06	-2.13515e-05	8.22e-06
STD	0.709201	0.999976	1.43e-05	1.41455e-05	9.75e-07	6.19863e-06	5.44e-07	11.2226	0.033	0.000158439	1.1e-05	6.7742e-05	6.01e-06	-1.21332e-05	6.13e-06	-5.01944e-05	5.59e-06
MNP	0.706158	0.706174	1.61e-05	1.85727e-05	8.68e-07	9.54157e-05	3.5e-06	13.4133	0.0905	0.000248551	1.23e-05	0.00127707	4.38e-05	1.00816e-05	5.99e-06	-2.42423e-05	8.38e-06
MNP	0.70617	0.706186	1.67e-05	2.40016e-05	9.64e-07	3.7324e-05	1.23e-06	9.77777	0.044	0.00023278	9.22e-06	0.000362744	1.1e-05	1.79607e-05	5.55e-06	-1.51635e-05	8.01e-06
MNP	0.706123	0.70614	1.4e-05	1.70629e-05	9.15e-07	1.91047e-05	9.37e-07	12.0062	0.0471	0.000206232	1.11e-05	0.00023281	1.19e-05	-8.78822e-07	6.21e-06	-2.15327e-05	6.18e-06
MNP	0.706167	0.706184	1.57e-05	1.3695e-05	8.02e-07	6.67739e-06	5.94e-07	13.177	0.146	0.00017537	1.03e-05	8.59075e-05	7.4e-06	9.70967e-06	6.6e-06	-4.3322e-05	8.37e-06
STD	0.709185	0.999973	1.64e-05	9.94951e-06	1.03e-06	3.04201e-06	5.51e-07	9.76842	0.0419	9.95143e-05	1.01e-05	2.98356e-05	5.46e-06	-1.10614e-05	5.59e-06	-5.20807e-05	5.18e-06
MNP	0.706156	0.706175	1.33e-05	1.14749e-05	8.23e-07	1.61898e-05	1.07e-06	12.4376	0.0553	0.000149729	1.01e-05	0.000204951	1.39e-05	-6.76541e-06	6.28e-06	-6.41789e-06	7.57e-06
MNP	0.706134	0.706153	1.47e-05	1.32564e-05	8.32e-07	2.10415e-05	9e-07	11.775	0.0494	0.000154137	9.72e-06	0.000245036	9.87e-06	1.10468e-05	5.73e-06	-3.49343e-05	7.28e-06
MNP	0.706133	0.706152	1.22e-05	1.27251e-05	7.55e-07	3.07699e-05	1.19e-06	12.0709	0.0521	0.000153322	8.82e-06	0.000369352	1.47e-05	7.6886e-06	5.57e-06	6.75044e-07	7.47e-06
MNP	0.706132	0.706151	1.36e-05	8.82415e-06	7.43e-07	1.29638e-05	7.52e-07	13.4556	0.062	0.0001216	1.02e-05	0.000174096	9.98e-06	-1.86977e-06	6.03e-06	-5.67456e-05	8.28e-06
STD	0.709197	0.999987	1.53e-05	6.70412e-06	1.14e-06	1.88224e-06	6.67e-07	8.64839	0.0442	6.28447e-05	9.56e-06	1.60231e-05	5.83e-06	-1.39289e-06	6.07e-06	-4.15772e-05	5.32e-06
MNP	0.706164	0.706173	1.37e-05	1.078e-05	7.32e-07	4.96606e-06	5.28e-07	12.2788	0.0565	0.000130165	8.75e-06	5.94896e-05	6.53e-06	4.05259e-06	5.88e-06	-3.367e-05	7.74e-06
MNP	0.70616	0.706169	1.29e-05	1.30506e-05	8.8e-07	9.7308e-06	9.96e-07	11.2851	0.0568	0.000147411	9.96e-06	0.000105283	1.05e-05	-6.75502e-06	5.4e-06	-3.978e-06	6.76e-06
MNP	0.706172	0.706181	1.57e-05	1.55087e-05	1.02e-06	6.30367e-06	7.12e-07	9.67601	0.0509	0.0001462	9.81e-06	6.01052e-05	6.94e-06	7.9991e-06	5.45e-06	7.31694e-06	6.98e-06
MNP	0.706164	0.706174	1.52e-05	1.19734e-05	7.82e-07	7.62925e-06	6.5e-07	11.735	0.0551	0.000144057	9.36e-06	8.97299e-05	7.67e-06	6.36193e-06	5.73e-06	-2.93471e-05	7.48e-06
STD	0.709204	1.00001	1.58e-05	1.19198e-05	1.1e-06	6.90044e-06	6.26e-07	9.06463	0.034	0.000103076	9.6e-06	6.16257e-05	5.65e-06	-1.86791e-05	5.71e-06	-1.05153e-05	5.54e-06
MNP	0.706183	0.706176	1.76e-05	2.11725e-05	9.26e-07	1.39863e-05	8.66e-07	9.50944	0.0427	0.000200468	9.09e-06	0.000131118	7.93e-06	2.76075e-05	5.63e-06	-5.29682e-06	7.48e-06
MNP	0.706136	0.706128	1.36e-05	1.58151e-05	7.33e-07	1.87785e-05	7.85e-07	13.637	0.0753	0.000211951	9.92e-06	0.000259785	1.08e-05	1.19184e-05	6.03e-06	1.12468e-05	7.98e-06
MNP	0.706195	0.706187	1.76e-05	1.40211e-05	7.63e-07	1.18641e-05	5.33e-07	14.4493	0.0812	0.000203109	1.09e-05	0.000174911	8.12e-06	8.25244e-06	6.27e-06	-2.15848e-05	8.87e-06
MNP	0.706163	0.706155	1.67e-05	1.68034e-05	8.4e-07	1.93234e-06	4.33e-07	13.3934	0.0978	0.000228353	1.16e-05	2.31434e-05	5.71e-06	6.84186e-06	6.84e-06	-9.92668e-06	8.59e-06
STD	0.709231	1.00002	1.54e-05	1.39021e-05	9.29e-07	1.57774e-06	5.88e-07	9.775	0.0633	0.000140531	9.04e-06	1.64552e-05	5.8e-06	-7.16114e-06	5.15e-06	2.55646e-08	5.46e-06
MNP	0.706155	0.706139	1.46e-05	2.17894e-05	8.26e-07	5.68534e-05	1.68e-06	12.8017	0.0606	0.000275728	1.04e-05	0.00071368	2.1e-05	2.41179e-05	5.92e-06	5.70233e-06	8.91e-06
MNP	0.706217	0.706201	2.11e-05	4.47164e-05	1.35e-06	1.40497e-05	1.09e-06	5.90864	0.0212	0.000260581	7.86e-06	8.2303e-05	6.4e-06	2.4529e-05	6.2e-06	4.68852e-05	7.07e-06
MNP	0.706198	0.706182	1.35e-05	1.84991e-05	7.02e-07	3.14251e-05	1.52e-06	14.535	0.0701	0.000271002	1.04e-05	0.000442089	1.98e-05	2.25673e-05	5.91e-06	-1.47721e-05	7.79e-06
MNP	0.706186	0.70617	1.49e-05	2.56482e-05	1.1e-06	6.2145e-05	5.32e-06	9.66848	0.0326	0.000243962	1.04e-05	0.000603716	5.04e-05	1.80326e-05	5.81e-06	1.80069e-05	7.71e-06
STD	0.709221	1.00002	1.47e-05	1.64977e-05	9e-07	4.99038e-06	4.48e-07	10.7927	0.0389	0.000177556	9.67e-06	5.45097e-05	4.89e-06	2.52436e-06	5.25e-06	-1.78316e-05	5.34e-06
MNP	0.706185	0.706173	1.34e-05	2.27306e-05	8.67e-07	3.45986e-05	1.25e-06	12.276	0.0519	0.000281839	1.07e-05	0.000422443	1.52e-05	1.30862e-05	5.33e-06	3.00159e-05	7.45e-06
MNP	0.706157	0.706144	1.52e-05	1.94422e-05	7.13e-07	3.22579e-05	9.49e-07	15.5634	0.0598	0.000304532	1.12e-05	0.000498826	1.41e-05	6.54015e-06	5.92e-06	-1.81774e-05	9.28e-06
MNP	0.706177	0.706165	1.41e-05	1.96558e-05	7.01e-07	4.66809e-05	3.12e-06	14.1914	0.0513	0.000280097	9.72e-06	0.000652993	4.26e-05	2.01427e-05	6.07e-06	5.55057e-06	7.3e-06
MNP	0.706165	0.706153	1.64e-05	5.32061e-06	4.56e-07	5.17044e-06	3.24e-07	41.02	0.616	0.000219769	1.97e-05	0.000195601	9.46e-06	1.94393e-05	5.98e-06	-1.59191e-05	7.64e-06
STD	0.709224	1.00002	1.53e-05	1.6779e-05	8.39e-07	5.2678e-06	4.92e-07	11.0517	0.0478	0.000183257	9.11e-06	5.78399e-05	5.46e-06	-2.16548e-06	5.19e-06	2.02316e-06	5.4e-06
MNP	0.706184	0.706169	1.52e-05	2.00652e-05	6.59e-07	7.89744e-05	2.69e-06	15.7746	0.109	0.000318005	1.07e-05	0.00132772	4.75e-05	6.6817e-06	5.5e-06	-1.23614e-05	8.8e-06
MNP	0.706178	0.706163	1.15e-05	1.97906e-05	6.37e-07	3.9464e-05	1.32e-06	15.9125	0.064	0.000314484	1.01e-05	0.000650399	2.32e-05	1.69146e-05	6.05e-06	-5.33762e-06	8.16e-06
MNP	0.706194	0.706179	2.21e-05	3.15014e-05	1.51e-06	3.34028e-05	3.48e-06	13.2073	0.442	0.000389179	1.34e-05	0.0003294	1.96e-05	1.17061e-05	7.96e-06	-1.18183e-06	1.08e-05
MNP	0.706198	0.706183	1.51e-05	2.45089e-05	7.03e-07	2.7321e-05	8.7e-07	13.0074	0.126	0.000324095	9.56e-06	0.000352556	1.07e-05	1.97654e-05	5.47e-06	7.4368e-06	8.21e-06
STD	0.709226		1.58e-05	1.75655e-05	9.03e-07	4.76159e-06	5.62e-07	11.5059	0.0425	0.000201806	1.03e-05	5.29584e-05	6.5e-06	-2.46648e-06	5.75e-06	-4.72185e-07	5.54e-06

## Sheet: MNP02
SampleName	87Sr/86Sr	87/86SrCorr	SE	'84Kr/88Sr'	SE	'85Rb/88Sr'	SE	'88 Intens'	SE	'Kr84 (V)'	SE	'Rb85 (V)'	SE
STD	0.70921	1	2.49e-05	2.17496e-05	8.89e-07	9.37337e-06	5.65e-07	15.4105	0.0905	0.000336584	1.36e-05	0.000145841	9.36e-06
MNP	0.706202	0.7062	2.58e-05	2.94046e-05	7.55e-07	1.65991e-05	5.96e-07	25.081	0.224	0.000731631	1.91e-05	0.000425986	1.77e-05
MNP	0.706182	0.70618	2.41e-05	3.35992e-05	7.08e-07	2.10097e-05	7.5e-07	24.8516	0.233	0.000825561	1.86e-05	0.000517842	1.71e-05
MNP	0.706163	0.706161	2.37e-05	3.13788e-05	6.86e-07	9.42208e-06	2.82e-07	25.5533	0.162	0.000794333	1.78e-05	0.000243705	7.8e-06
MNP	0.706214	0.706213	2.15e-05	3.69086e-05	7.58e-07	2.56566e-05	1.49e-06	22.1681	0.192	0.000816268	1.8e-05	0.000577204	3.53e-05
STD	0.709214	1	2.99e-05	2.0831e-05	9.49e-07	5.17445e-06	3.98e-07	15.2629	0.118	0.000321274	1.49e-05	7.95562e-05	6.13e-06
MNP	0.706161	0.706158	2.66e-05	3.44224e-05	7.73e-07	1.46544e-05	4.83e-07	24.4212	0.18	0.000822344	1.93e-05	0.000356686	1.09e-05
MNP	0.706139	0.706136	2.54e-05	2.90678e-05	7.62e-07	7.00234e-06	3.15e-07	25.7532	0.143	0.000745218	1.96e-05	0.000178131	8.04e-06
MNP	0.706186	0.706183	2.42e-05	3.64396e-05	7.22e-07	1.38228e-05	5.69e-07	24.0876	0.2	0.000871466	1.71e-05	0.000326786	1.27e-05
MNP	0.706167	0.706164	2.54e-05	2.59878e-05	7.99e-07	2.07359e-05	1.03e-06	18.4581	0.129	0.000485656	1.57e-05	0.000377836	1.79e-05
STD	0.709213	1.00003	2.83e-05	1.90726e-05	9.02e-07	3.70902e-06	3.66e-07	15.3647	0.135	0.000282347	1.3e-05	5.67882e-05	5.67e-06
MNP	0.706187	0.706169	2.77e-05	2.58098e-05	8.71e-07	4.83505e-06	3.59e-07	18.7427	0.114	0.000485396	1.72e-05	9.29234e-05	6.9e-06
MNP	0.706144	0.706126	2.81e-05	2.19432e-05	9.25e-07	7.31885e-06	4.43e-07	19.7124	0.0948	0.00043179	1.78e-05	0.000143776	8.61e-06
MNP	0.706193	0.706174	2.28e-05	2.55948e-05	7.75e-07	1.06705e-05	3.5e-07	17.9946	0.123	0.000458812	1.39e-05	0.000192347	6.31e-06
MNP	0.70617	0.706151	2.5e-05	2.61027e-05	7.84e-07	5.24365e-06	3.5e-07	17.5635	0.107	0.000447666	1.35e-05	9.04754e-05	6.02e-06
STD	0.709245	1.00004	2.71e-05	1.90366e-05	8.88e-07	4.99276e-06	3.99e-07	15.4735	0.121	0.000298453	1.4e-05	7.82414e-05	6.28e-06
MNP	0.706166	0.706137	3.11e-05	3.28465e-05	1e-06	8.42325e-06	4.67e-07	14.1282	0.0939	0.000471948	1.35e-05	0.000118623	6.27e-06
MNP	0.706212	0.706184	2.32e-05	2.27504e-05	7.74e-07	1.5685e-05	7.43e-07	20.4587	0.117	0.000451249	1.51e-05	0.000313679	1.39e-05
MNP	0.706168	0.70614	2.51e-05	2.45502e-05	7.6e-07	7.09363e-06	4e-07	18.8761	0.11	0.000466487	1.47e-05	0.000133543	7.47e-06
MNP	0.70618	0.706152	2.27e-05	2.21712e-05	8.25e-07	2.80064e-05	1.5e-06	19.0396	0.112	0.00041996	1.6e-05	0.000493592	2.25e-05
STD	0.709233	1.00005	2.06e-05	1.88649e-05	7.85e-07	3.29651e-06	3.87e-07	16.3753	0.0856	0.000306156	1.25e-05	5.42509e-05	6.37e-06
MNP	0.706151	0.706119	2.72e-05	2.06632e-05	9.19e-07	4.61246e-06	3.08e-07	20.571	0.168	0.000426913	1.92e-05	9.80816e-05	6.77e-06
MNP	0.706147	0.706115	2.68e-05	1.95108e-05	8.21e-07	2.16474e-05	8.92e-07	20.8458	0.129	0.000403389	1.71e-05	0.000452893	1.86e-05
MNP	0.706172	0.70614	2.58e-05	1.99284e-05	7.96e-07	1.97768e-05	7.65e-07	21.1479	0.127	0.000421754	1.66e-05	0.000419159	1.7e-05
MNP	0.70616	0.706127	2.56e-05	1.73617e-05	7.34e-07	4.50738e-05	3.02e-06	21.3302	0.141	0.000369078	1.57e-05	0.000930189	5.9e-05
STD	0.709252	1.00003	2.63e-05	1.83428e-05	1.07e-06	4.94207e-06	4.25e-07	13.8018	0.125	0.000253116	1.5e-05	6.81237e-05	6.09e-06
MNP	0.706175	0.706154	2.38e-05	3.42875e-05	7.56e-07	6.5811e-05	4.03e-06	15.5174	0.116	0.000537962	1.18e-05	0.00102649	6.46e-05
MNP	0.706195	0.706175	2.83e-05	2.42261e-05	9.69e-07	6.48642e-05	2.67e-06	20.9287	0.16	0.000503022	1.97e-05	0.00132039	5.23e-05
MNP	0.706247	0.706226	2.4e-05	3.99087e-05	8.84e-07	7.59601e-05	4.37e-06	12.5444	0.0453	0.000499605	1.05e-05	0.000925872	5.09e-05
MNP	0.706254	0.706233	2.89e-05	6.04071e-05	1.28e-06	0.000121	4.69e-06	7.0862	0.073	0.000424314	8.87e-06	0.00083399	3.22e-05
STD	0.70921	1	2.81e-05	2.10269e-05	9.23e-07	4.648e-06	4.12e-07	15.9549	0.101	0.000340717	1.47e-05	7.32159e-05	6.64e-06
MNP	0.706163	0.70616	2.87e-05	6.81077e-05	2.09e-06	0.000108212	4.86e-06	7.13679	0.0882	0.000470647	1.15e-05	0.000723591	2.98e-05
MNP	0.70623	0.706227	2.48e-05	5.03773e-05	1.02e-06	5.32449e-05	1.73e-06	9.71222	0.0604	0.000485293	9.61e-06	0.000520552	1.94e-05
MNP	0.706173	0.706169	3.07e-05	2.05897e-05	8.2e-07	1.61798e-05	6.72e-07	21.6184	0.0989	0.000440901	1.75e-05	0.000350071	1.44e-05
MNP	0.706184	0.706181	3.25e-05	2.2684e-05	8.56e-07	1.4641e-05	8.79e-07	20.6731	0.131	0.000477584	1.8e-05	0.000297223	1.7e-05
STD	0.709217	1.00003	2.48e-05	2.14742e-05	8.79e-07	6.21251e-06	3.61e-07	15.581	0.081	0.000332081	1.35e-05	9.75128e-05	5.73e-06
MNP	0.706195	0.706177	3e-05	2.01499e-05	9.31e-07	1.99684e-05	9.11e-07	20.3963	0.0869	0.000411038	1.89e-05	0.000409688	1.92e-05
MNP	0.706189	0.706171	3.13e-05	2.19927e-05	8.71e-07	3.19572e-05	1.95e-06	20.663	0.106	0.000464407	1.85e-05	0.000669257	4.15e-05
MNP	0.706195	0.706177	2.65e-05	2.35874e-05	8.77e-07	1.08655e-05	5.6e-07	19.4674	0.11	0.000446551	1.62e-05	0.000212483	1.11e-05
MNP	0.706199	0.706181	2.87e-05	2.14849e-05	8.26e-07	1.40984e-05	1.01e-06	20.4266	0.127	0.000437676	1.69e-05	0.000286603	1.99e-05
STD	0.709238	1.00005	3.55e-05	2.21163e-05	1.38e-06	3.20239e-06	7.05e-07	11.8832	0.325	0.000253135	1.66e-05	4.16114e-05	8.47e-06
MNP	0.706206	0.706169	2.7e-05	2.20674e-05	9.06e-07	1.75176e-05	8.88e-07	18.8178	0.0823	0.000410829	1.66e-05	0.000325996	1.62e-05
MNP	0.70617	0.706133	2.87e-05	2.06467e-05	8.86e-07	6.3965e-06	3.5e-07	20.2885	0.127	0.000414383	1.77e-05	0.000129227	7.04e-06
MNP	0.706225	0.706188	2.62e-05	2.50187e-05	8.49e-07	1.68875e-05	5.16e-07	19.805	0.135	0.000504524	1.74e-05	0.000335373	1.05e-05
MNP	0.706206	0.706169	2.43e-05	3.3467e-05	9.59e-07	1.62184e-05	5.54e-07	17.4623	0.0996	0.000576863	1.66e-05	0.000281942	9.99e-06
STD	0.709256	1.00005	2.77e-05	1.94072e-05	8.4e-07	5.75772e-06	3.76e-07	15.3681	0.083	0.000290965	1.23e-05	8.8603e-05	5.79e-06
MNP	0.706217	0.706182	3.13e-05	2.77153e-05	9.27e-07	1.23397e-05	6.95e-07	18.5052	0.106	0.000512203	1.72e-05	0.000228721	1.22e-05
MNP	0.706219	0.706183	2.64e-05	2.75529e-05	7.79e-07	1.21202e-05	4.19e-07	17.5146	0.105	0.000487285	1.42e-05	0.00021176	7.11e-06
MNP	0.706225	0.706189	2.76e-05	2.33441e-05	8.21e-07	2.7984e-05	1.7e-06	18.2207	0.0931	0.000426802	1.47e-05	0.000499083	2.93e-05
MNP	0.706217	0.706181	2.68e-05	3.13173e-05	8.66e-07	2.07214e-05	1.02e-06	16.8146	0.0896	0.0005187	1.47e-05	0.000346501	1.62e-05
STD	0.709235	1.00004	2.86e-05	1.95082e-05	9.89e-07	6.09624e-06	4.32e-07	15.2994	0.095	0.000290623	1.46e-05	9.46385e-05	6.73e-06
MNP	0.706198	0.706172	2.93e-05	2.33357e-05	8.64e-07	2.27971e-05	7.62e-07	19.1663	0.121	0.000455979	1.73e-05	0.000437265	1.49e-05
MNP	0.706207	0.70618	2.58e-05	4.1169e-05	9.99e-07	1.75528e-05	5.16e-07	14.6017	0.0931	0.000604216	1.39e-05	0.000260172	7.73e-06
MNP	0.706215	0.706189	3.21e-05	2.75014e-05	9.51e-07	6.54257e-06	4.23e-07	15.4009	0.0948	0.000419157	1.43e-05	9.82242e-05	6.36e-06
MNP	0.706227	0.706201	2.35e-05	2.60393e-05	8.08e-07	9.79492e-06	4.46e-07	18.1573	0.0975	0.00046942	1.44e-05	0.000178076	8.08e-06
STD	0.709239	1.00005	2.66e-05	1.86959e-05	1.04e-06	4.2158e-06	3.65e-07	15.4297	0.0957	0.000290145	1.6e-05	6.24873e-05	5.64e-06
MNP	0.706225	0.706191	2.37e-05	3.05908e-05	7.55e-07	2.09401e-05	7.67e-07	19.1042	0.0936	0.000580061	1.52e-05	0.000401133	1.48e-05
MNP	0.706234	0.7062	2.46e-05	2.65363e-05	7.69e-07	1.04499e-05	4.32e-07	17.8532	0.0986	0.000478591	1.4e-05	0.000186894	7.78e-06
MNP	0.706233	0.706199	2.51e-05	2.7388e-05	8.57e-07	7.15783e-06	3.23e-07	17.4664	0.0951	0.000474739	1.45e-05	0.000123697	5.51e-06
MNP	0.706277	0.706243	2.16e-05	2.76473e-05	7.43e-07	5.49643e-05	2.48e-06	18.5462	0.113	0.000516759	1.47e-05	0.00102646	4.74e-05
STD	0.709249	1.00006	2.64e-05	1.81609e-05	8.96e-07	3.5842e-06	3.62e-07	15.1699	0.0866	0.00027469	1.34e-05	5.77193e-05	5.88e-06
MNP	0.706238	0.706192	2.98e-05	3.63459e-05	9.86e-07	3.68817e-05	1.62e-06	13.2573	0.131	0.000481517	1.26e-05	0.00049952	2.29e-05
MNP	0.706234	0.706188	2.26e-05	2.71778e-05	8.24e-07	2.83122e-05	9.83e-07	16.9628	0.0985	0.000456986	1.39e-05	0.000482838	1.74e-05
MNP	0.706219	0.706173	2.5e-05	3.06554e-05	7.87e-07	2.27057e-05	6.54e-07	14.8933	0.106	0.000457444	1.18e-05	0.000340365	9.28e-06
MNP	0.706225	0.706179	2.33e-05	2.81321e-05	8.84e-07	1.01814e-05	3.52e-07	18.5023	0.105	0.000516942	1.58e-05	0.000190901	6.5e-06
STD	0.709263	1.00008	2.34e-05	1.79398e-05	8.08e-07	7.40197e-06	3.94e-07	15.0301	0.13	0.000265148	1.19e-05	0.000111364	6.25e-06
MNP	0.706228	0.706175	2.08e-05	2.66098e-05	6.92e-07	1.51606e-05	7.28e-07	19.6777	0.112	0.00052614	1.39e-05	0.000290771	1.3e-05
MNP	0.706233	0.706179	2.43e-05	2.58946e-05	7.93e-07	9.09091e-06	3.52e-07	19.1414	0.0921	0.000497962	1.53e-05	0.000173928	6.8e-06
MNP	0.706265	0.706211	2.29e-05	2.90703e-05	6.9e-07	1.09623e-05	3.21e-07	19.7268	0.0963	0.000576919	1.42e-05	0.000217537	6.44e-06
MNP	0.706267	0.706213	2.75e-05	2.70271e-05	8.67e-07	2.63887e-05	1.64e-06	18.1873	0.0967	0.000494616	1.59e-05	0.000482075	2.99e-05
STD	0.709266		2.34e-05	1.49398e-05	7.08e-07	6.40197e-06	2.94e-07	15.0301	0.13	0.000265148	1.19e-05	0.000111364	6.25e-06
STD	0.709249	1.00002	3.57e-05	2.33448e-05	1.17e-06	6.27395e-06	5.23e-07	14.8707	0.133	0.000338587	1.67e-05	9.02487e-05	8.11e-06
MNP	0.706179	0.706167	2.67e-05	2.75001e-05	8.24e-07	7.0924e-06	3.04e-07	11.2557	0.0366	0.000439902	1.15e-05	0.000325918	2.06e-05
MNP	0.706173	0.706161	2.59e-05	2.63913e-05	8.66e-07	1.01929e-05	3.98e-07	19.3985	0.107	0.000513263	1.39e-05	0.000333131	1.5e-05
MNP	0.706161	0.706149	2.73e-05	2.37228e-05	7.14e-07	7.26395e-06	3.48e-07	18.9472	0.0957	0.000541824	1.66e-05	0.000288837	9.31e-06
MNP	0.706189	0.706178	2.67e-05	2.58903e-05	8.68e-07	1.31303e-05	5.46e-07	15.5577	0.109	0.000447264	1.49e-05	0.000150163	6.11e-06
MNP	0.706148	0.706136	2.8e-05	2.39228e-05	8.44e-07	9.20078e-06	3.2e-07	14.7462	0.094	0.000461411	1.32e-05	0.000144584	6.09e-06
STD	0.709194	0.999997	2.78e-05	2.0817e-05	8.14e-07	7.62745e-06	4.41e-07	13.9537	0.1	0.000473908	1.2e-05	0.000140415	7.38e-06
MNP	0.706172	0.706174	2.46e-05	2.34948e-05	7.52e-07	1.53114e-05	6.12e-07	14.2694	0.1	0.000456488	1.31e-05	0.000124872	5.67e-06
MNP	0.706147	0.706149	2.94e-05	2.43734e-05	9.43e-07	9.16858e-06	5.08e-07	14.3742	0.0939	0.000448435	1.36e-05	0.000105135	5.67e-06
MNP	0.706155	0.706157	2.59e-05	3.88187e-05	1.01e-06	2.90644e-05	1.86e-06	18.418	0.117	0.000514338	1.49e-05	0.000131426	5.72e-06
MNP	0.706181	0.706183	3.03e-05	2.82328e-05	9.51e-07	0.000102736	5.11e-06	18.8419	0.0949	0.000492244	1.66e-05	0.000192623	7.42e-06
MNP	0.706232	0.706234	3.8e-05	2.62554e-05	1.1e-06	2.76509e-05	1.01e-06	20.6563	0.13	0.000484206	1.49e-05	0.000153092	7.51e-06
STD	0.709222	1.00002	2.87e-05	1.98666e-05	8.66e-07	7.72863e-06	4.51e-07	14.039	0.1	0.000464261	1.29e-05	0.000121892	6.23e-06
MNP	0.706176	0.706159	2.45e-05	2.78295e-05	7.35e-07	5.66029e-06	3.49e-07	17.8764	0.0982	0.000462262	1.56e-05	0.000230357	8.91e-06
MNP	0.706112	0.706095	3.47e-05	3.94555e-05	1.55e-06	1.35655e-05	7.29e-07	19.7103	0.0879	0.000470341	1.65e-05	0.000183872	6.8e-06
MNP	0.706199	0.706181	2.61e-05	3.36334e-05	8.16e-07	1.20935e-05	4.72e-07	15.2978	0.0986	0.000317816	1.25e-05	0.000114759	6.77e-06
MNP	0.706215	0.706198	2.41e-05	2.35577e-05	7.3e-07	1.77961e-05	7.86e-07	20.1407	0.0869	0.00047611	1.53e-05	0.000308153	1.22e-05
MNP	0.706186	0.706168	2.67e-05	2.17227e-05	8.4e-07	1.10141e-05	5.96e-07	19.3092	0.2	0.00046738	1.7e-05	0.000184478	9.08e-06
STD	0.709233	1.00004	2.54e-05	2.16113e-05	1.13e-06	1.45554e-05	6.17e-07	14.5911	0.12	0.000487005	1.62e-05	0.000131446	6.65e-06
MNP	0.706211	0.706182	2.36e-05	2.65722e-05	7.35e-07	1.90034e-05	1.08e-06	15.8669	0.0708	0.000453654	1.54e-05	0.00160464	7.69e-05
MNP	0.706172	0.706143	2.7e-05	2.58849e-05	8.88e-07	1.92334e-05	6.39e-07	20.6896	0.218	0.000519309	2.25e-05	0.000682038	3.48e-05
MNP	0.706245	0.706216	2.69e-05	2.56072e-05	8.22e-07	3.96981e-05	1.78e-06	12.97	0.0894	0.000257958	1.12e-05	9.9023e-05	5.8e-06
MNP	0.70614	0.706111	2.53e-05	2.21478e-05	7.19e-07	2.81469e-05	1.91e-06	16.7737	0.109	0.00046258	1.18e-05	9.71978e-05	5.94e-06
MNP	0.706194	0.706164	2.88e-05	1.98536e-05	9.71e-07	1.94283e-05	9.1e-07	10.453	0.247	0.000406041	1.11e-05	0.000132711	5.96e-06
STD	0.709246	1.00004	2.4e-05	2.22716e-05	8.86e-07	7.00049e-06	4.38e-07	14.3962	0.0913	0.000293184	1.45e-05	6.54796e-05	6.02e-06
MNP	0.706182	0.706152	2.44e-05	2.34112e-05	7.47e-07	1.11649e-05	5.07e-07	14.1662	0.0958	0.000471975	1.15e-05	0.000171921	6.4e-06
MNP	0.706252	0.706222	2.76e-05	3.24407e-05	8.07e-07	1.12508e-05	7.22e-07	19.2873	0.117	0.000458139	1.44e-05	0.000346074	1.59e-05
MNP	0.706198	0.706168	2.35e-05	2.38715e-05	7.9e-07	1.70194e-05	8.66e-07	20.6264	0.122	0.000448488	1.77e-05	0.000224892	1.16e-05
MNP	0.706209	0.706179	2.83e-05	2.89906e-05	8.64e-07	1.52797e-05	5.19e-07	11.6353	0.117	0.000249236	1.35e-05	0.000163608	6.94e-06
MNP	0.706186	0.706157	2.95e-05	2.69827e-05	8.24e-07	3.63799e-05	2e-06	19.2981	0.112	0.000494556	1.66e-05	0.000370159	1.24e-05
STD	0.709234	1.00006	2.39e-05	2.05973e-05	8.89e-07	4.26381e-06	4.99e-07	14.5285	0.113	0.000461598	1.18e-05	0.000105836	5.34e-06
MNP	0.706175	0.706131	2.35e-05	2.35552e-05	7.83e-07	8.95033e-06	3.95e-07	19.3295	0.122	0.000492431	1.6e-05	0.000751398	3.2e-05
MNP	0.70623	0.706186	2.18e-05	2.48813e-05	8.59e-07	1.22497e-05	4.49e-07	20.9308	0.0913	0.00045931	1.47e-05	0.000575029	3.74e-05
MNP	0.706209	0.706165	2.86e-05	3.40428e-05	1.02e-06	9.08565e-06	4.05e-07	21.5923	0.141	0.000434569	2.04e-05	0.000423457	1.84e-05
MNP	0.706171	0.706127	2.68e-05	2.32995e-05	8.72e-07	1.30044e-05	4.3e-07	14.4979	0.104	0.000322197	1.28e-05	0.000103428	6.59e-06
MNP	0.706177	0.706133	2.56e-05	2.16214e-05	7.66e-07	1.67148e-05	9.71e-07	20.6314	0.122	0.000478188	1.5e-05	0.000229542	1.03e-05
STD	0.709274	1.00006	2.46e-05	2.02897e-05	8.71e-07	3.18588e-05	8.96e-07	14.5267	0.0747	0.000439432	1.19e-05	7.9384e-05	5.4e-06
MNP	0.706232	0.706186	2.43e-05	2.87067e-05	9.5e-07	9.70157e-06	3.84e-07	14.5324	0.0873	0.000475012	1.21e-05	0.000163879	1.06e-05
MNP	0.706222	0.706177	2.78e-05	2.95538e-05	9.1e-07	1.07864e-05	4.02e-07	18.7908	0.155	0.000462515	1.52e-05	0.00032416	1.73e-05
MNP	0.706215	0.70617	2.4e-05	3.12979e-05	9.11e-07	1.34633e-05	4.76e-07	17.3971	0.141	0.000474175	1.46e-05	0.000631981	3.32e-05
MNP	0.706205	0.706159	2.72e-05	2.98611e-05	9.7e-07	1.24778e-05	5.78e-07	14.4538	0.0602	0.000296969	1.27e-05	6.17301e-05	7.29e-06
MNP	0.706176	0.706131	2.67e-05	3.53649e-05	9.2e-07	1.20316e-05	5.69e-07	17.9728	0.121	0.000425707	1.41e-05	0.000160119	7.1e-06
STD	0.709236	1.00005	2.57e-05	2.11074e-05	1.06e-06	3.20793e-06	3.87e-07	18.0591	0.102	0.000403394	1.47e-05	8.83778e-05	6.43e-06
MNP	0.706202	0.706167	2.6e-05	3.15948e-05	9e-07	1.20358e-05	4.07e-07	14.48	0.0771	0.000492264	1.47e-05	0.000132746	5.9e-06
MNP	0.706224	0.706188	2.93e-05	2.93926e-05	9.39e-07	8.22267e-06	3.97e-07	19.6497	0.122	0.00045262	1.7e-05	0.000257703	9.13e-06
MNP	0.706237	0.706202	2.61e-05	3.04349e-05	8.86e-07	7.1968e-06	3.79e-07	20.1138	0.0988	0.000436134	1.53e-05	0.000335136	1.9e-05
MNP	0.706236	0.706201	2.64e-05	3.17248e-05	9.16e-07	9.74316e-06	4.15e-07	13.8821	0.116	0.000281407	1.25e-05	0.000435614	1.43e-05
STD	0.709256	1.00008	2.73e-05	1.92407e-05	9.48e-07	1.38197e-05	8.62e-07	2.02361	0.00945	0.000294669	7.84e-06	-1.98737e-05	5.94e-06
MNP	0.706237	0.706181	2.4e-05	3.1975e-05	8.73e-07	8.73923e-06	3.94e-07	14.2437	0.0749	0.000425859	1.3e-05	0.000154935	5.58e-06
MNP	0.70622	0.706164	2.74e-05	3.10569e-05	9.3e-07	7.36973e-06	3.92e-07	14.2978	0.0809	0.000445236	1.23e-05	0.000194901	6.92e-06
MNP	0.706203	0.706147	2.77e-05	3.35962e-05	8.86e-07	1.01919e-05	5.14e-07	14.5751	0.09	0.000428339	1.41e-05	0.000182818	7.95e-06
MNP	0.706217	0.706161	2.55e-05	3.37905e-05	9.14e-07	8.92661e-06	4.26e-07	12.5484	0.142	0.000440322	1.11e-05	0.000150143	7.76e-06
MNP	0.706182	0.706126	2.59e-05	3.32928e-05	1.12e-06	8.8307e-06	4.59e-07	14.5665	0.0761	0.000307135	1.5e-05	4.65652e-05	5.64e-06
STD	0.709277	1.00005	3e-05	2.01497e-05	9.83e-07	4.52322e-06	4.2e-07	14.1892	0.0949	0.000456378	1.34e-05	8.91024e-05	6.22e-06
MNP	0.706214	0.706177	2.42e-05	3.23467e-05	8.42e-07	7.47158e-06	3.69e-07	0.0422623	0.000349	5.02199e-06	7.36e-06	0.427274	0.00276
MNP	0.706191	0.706154	2.48e-05	3.00771e-05	8.31e-07	5.45148e-06	3.72e-07	15.1317	0.0959	0.00047618	1.33e-05	0.000183805	6.28e-06
MNP	0.706174	0.706137	2.85e-05	2.22934e-05	8.44e-07	4.86326e-06	3.44e-07	15.5334	0.0909	0.000451047	1.39e-05	0.000130399	6.32e-06
MNP	0.706214	0.706176	2.57e-05	3.18911e-05	9.36e-07	6.21787e-06	4.28e-07	13.6001	0.0581	0.000264259	1.28e-05	0.000191013	1.26e-05
STD	0.709217		2.62e-05	2.11307e-05	9.23e-07	1.12552e-06	3.84e-07	14.4811	0.0727	0.000308546	1.35e-05	1.66015e-05	5.61e-06
STD	0.709199	0.999973	2.56e-05	2.06255e-05	8.85e-07	4.60732e-06	3.81e-07	15.1736	0.0874	0.000315967	1.36e-05	6.90227e-05	5.68e-06
MNP	0.706189	0.706208	2.64e-05	2.63735e-05	8.99e-07	7.36066e-06	4.39e-07	16.8339	0.137	0.000439899	1.48e-05	0.000126152	7.2e-06
MNP	0.70619	0.706209	2.28e-05	3.14176e-05	9.3e-07	8.43361e-06	3.73e-07	14.7653	0.0799	0.000466023	1.33e-05	0.000123288	5.4e-06
MNP	0.706178	0.706197	2.9e-05	3.00578e-05	1.01e-06	8.3645e-06	3.79e-07	15.8555	0.0898	0.00047489	1.6e-05	0.000132535	5.94e-06
MNP	0.706207	0.706226	2.61e-05	3.96152e-05	9.07e-07	1.39506e-05	3.94e-07	12.8796	0.0826	0.000507979	1.17e-05	0.00017977	5.45e-06
MNP	0.706193	0.706212	2.45e-05	3.40268e-05	8.4e-07	8.92991e-06	3.81e-07	14.4995	0.11	0.000482619	1.19e-05	0.000127376	5.64e-06
STD	0.709184	0.999996	2.65e-05	2.30253e-05	9.32e-07	6.26975e-06	4.42e-07	14.5876	0.0888	0.000329311	1.35e-05	9.29792e-05	6.48e-06
MNP	0.706171	0.706174	2.45e-05	3.34954e-05	8.92e-07	9.6211e-06	4.6e-07	15.0677	0.0924	0.000503664	1.32e-05	0.000147087	7.22e-06
MNP	0.70615	0.706152	2.71e-05	2.91239e-05	8.91e-07	8.71678e-06	4.41e-07	16.2355	0.106	0.000479633	1.47e-05	0.000143663	7.21e-06
MNP	0.706218	0.70622	2.67e-05	3.5579e-05	9.7e-07	4.78605e-05	1.59e-06	16.0915	0.097	0.000576829	1.62e-05	0.000770355	2.47e-05
MNP	0.706184	0.706187	2.59e-05	3.19864e-05	8.34e-07	5.74691e-05	2.59e-06	15.6803	0.102	0.000512502	1.36e-05	0.000902846	4e-05
STD	0.709231	1.00003	2.8e-05	2.23436e-05	1.04e-06	4.79757e-06	4.18e-07	14.6504	0.125	0.00032587	1.49e-05	7.19483e-05	6.26e-06
MNP	0.706192	0.706174	2.52e-05	2.98132e-05	8.6e-07	0.000116491	9.03e-06	18.1358	0.115	0.000547159	1.62e-05	0.00210071	0.000166
MNP	0.70617	0.706152	2.58e-05	2.24624e-05	8.11e-07	3.34755e-05	1.71e-06	20.6776	0.118	0.000467441	1.67e-05	0.000694976	3.45e-05
MNP	0.706197	0.706179	2.6e-05	2.78651e-05	8.35e-07	1.11862e-05	4.65e-07	16.321	0.0958	0.000457998	1.41e-05	0.000181912	7.48e-06
MNP	0.706172	0.706154	2.55e-05	2.36017e-05	8.92e-07	1.23896e-05	6.19e-07	19.4836	0.112	0.000458906	1.69e-05	0.000238823	1.19e-05
MNP	0.70619	0.706172	2.88e-05	3.25835e-05	9.37e-07	3.28469e-05	9.25e-07	15.3163	0.0613	0.000494484	1.4e-05	0.000512433	1.64e-05
STD	0.709225	1.00002	2.33e-05	2.14626e-05	8.94e-07	5.97547e-06	4.2e-07	14.5727	0.0721	0.000309031	1.26e-05	8.47471e-05	5.78e-06
MNP	0.706266	0.706253	3.38e-05	9.08097e-05	1.99e-06	6.66837e-05	4.56e-06	5.19239	0.0293	0.000468668	9.99e-06	0.000337982	2.16e-05
MNP	0.706196	0.706183	2.78e-05	3.34236e-05	9.31e-07	3.69021e-05	1.44e-06	15.3382	0.224	0.000500619	1.33e-05	0.000559037	2.39e-05
MNP	0.706213	0.7062	2.97e-05	3.63356e-05	9.05e-07	9.7634e-06	4.5e-07	14.1326	0.0949	0.000510094	1.33e-05	0.000135232	6.41e-06
MNP	0.706214	0.706201	2.79e-05	3.74795e-05	9.95e-07	1.25567e-05	3.98e-07	13.6446	0.0818	0.000522172	1.45e-05	0.000170546	5.48e-06
MNP	0.706176	0.706163	2.85e-05	3.36554e-05	9.03e-07	8.64533e-06	3.54e-07	15.1504	0.103	0.000509952	1.37e-05	0.000128514	5.21e-06
STD	0.709221	1.00002	3.11e-05	2.20448e-05	9.59e-07	6.08706e-06	4.34e-07	14.5531	0.128	0.000338164	1.4e-05	8.79283e-05	6.65e-06
MNP	0.706213	0.706198	2.61e-05	3.11757e-05	8.34e-07	3.94628e-05	1.59e-06	16.9074	0.121	0.000529243	1.43e-05	0.000654762	2.4e-05
MNP	0.706237	0.706223	2.78e-05	2.77042e-05	9.02e-07	1.70851e-05	7.21e-07	18.8334	0.135	0.000522615	1.72e-05	0.000319493	1.24e-05
MNP	0.706183	0.706169	2.6e-05	2.71255e-05	8.67e-07	8.2083e-05	2.43e-06	18.8721	0.104	0.00051787	1.65e-05	0.00153307	4.31e-05
MNP	0.706136	0.706122	2.8e-05	2.82151e-05	8.73e-07	5.16517e-05	1.97e-06	18.7848	0.11	0.000530545	1.59e-05	0.000958639	3.39e-05
MNP	0.706178	0.706163	2.91e-05	2.99265e-05	8.72e-07	6.1422e-05	2.13e-06	18.5839	0.108	0.00055521	1.64e-05	0.00114346	4.14e-05
STD	0.709229	1.00002	2.78e-05	2.29638e-05	9.13e-07	6.6353e-06	4.06e-07	14.3184	0.0825	0.000329079	1.36e-05	9.42838e-05	5.98e-06
MNP	0.706203	0.70619	2.55e-05	2.71722e-05	8.46e-07	1.59135e-05	6.86e-07	19.3355	0.109	0.000526673	1.67e-05	0.000303713	1.22e-05
MNP	0.7062	0.706187	1.96e-05	2.56675e-05	6.99e-07	1.75719e-05	1.2e-06	20.154	0.134	0.000519545	1.43e-05	0.000355249	2.36e-05
MNP	0.706253	0.70624	2.51e-05	3.1359e-05	9.13e-07	2.97367e-05	8.69e-07	16.8153	0.175	0.000521219	1.55e-05	0.000499592	1.18e-05
MNP	0.70621	0.706196	2.34e-05	3.33081e-05	7.43e-07	1.49032e-05	4.4e-07	17.6161	0.116	0.000585244	1.25e-05	0.000262944	8.19e-06
MNP	0.706191	0.706178	2.44e-05	2.87791e-05	7.38e-07	1.14e-05	4.53e-07	17.8895	0.11	0.00051098	1.33e-05	0.000203656	8.27e-06
STD	0.709218	1.00003	2.68e-05	2.18935e-05	1.02e-06	6.02083e-06	5.05e-07	13.3608	0.0789	0.00029013	1.35e-05	8.09485e-05	6.79e-06
MNP	0.70619	0.706172	2.49e-05	2.61536e-05	7.56e-07	1.85497e-05	7.03e-07	19.243	0.139	0.000500448	1.46e-05	0.000354555	1.35e-05
MNP	0.706181	0.706163	2.55e-05	2.12476e-05	7.17e-07	1.44567e-05	5.82e-07	21.0019	0.133	0.000442353	1.49e-05	0.000309168	1.33e-05
MNP	0.706197	0.706179	2.55e-05	2.82239e-05	7.65e-07	6.8428e-06	3.54e-07	16.8412	0.11	0.000475757	1.31e-05	0.000117221	6.07e-06
MNP	0.706223	0.706205	2.89e-05	4.04016e-05	1.13e-06	1.49922e-05	4.9e-07	13.9275	0.104	0.000564897	1.59e-05	0.000211038	6.77e-06
MNP	0.706263	0.706245	3.02e-05	4.01408e-05	9.93e-07	1.36301e-05	4.2e-07	13.1489	0.0837	0.000531199	1.34e-05	0.000182418	5.52e-06
STD	0.709238	1.00003	2.19e-05	2.16786e-05	8.57e-07	9.56741e-06	4.05e-07	14.0804	0.0754	0.000304698	1.2e-05	0.000132576	5.66e-06
MNP	0.706219	0.706196	2.95e-05	3.17585e-05	8.87e-07	8.50232e-06	3.63e-07	15.0844	0.115	0.000480067	1.27e-05	0.000128472	5.57e-06
MNP	0.706199	0.706177	3.26e-05	3.22707e-05	8.98e-07	8.25601e-06	3.85e-07	14.934	0.0727	0.000481271	1.33e-05	0.000123403	5.84e-06
MNP	0.706248	0.706226	2.54e-05	2.62264e-05	8.78e-07	5.66836e-06	3.77e-07	17.8115	0.11	0.000455008	1.44e-05	0.000101775	6.86e-06
MNP	0.706196	0.706174	2.85e-05	3.31913e-05	1.03e-06	7.11747e-06	3.84e-07	14.3458	0.0808	0.000477638	1.5e-05	0.00010343	5.42e-06
MNP	0.706235	0.706213	2.91e-05	4.04125e-05	9.06e-07	1.03829e-05	4.39e-07	14.2873	0.0965	0.000571545	1.27e-05	0.000150666	6.57e-06
STD	0.709227	1.00005	2.56e-05	2.24856e-05	8.84e-07	7.75865e-06	4.87e-07	14.9966	0.0833	0.000341256	1.28e-05	0.000119586	7.42e-06
MNP	0.70623	0.706195	2.66e-05	3.01995e-05	1.08e-06	8.57698e-06	4.3e-07	15.0663	0.0826	0.000459349	1.59e-05	0.000129097	6.39e-06
MNP	0.706236	0.706202	3.18e-05	3.38826e-05	9.13e-07	8.51005e-06	4.48e-07	13.6029	0.0903	0.000462425	1.34e-05	0.000114379	6e-06
MNP	0.70625	0.706215	2.74e-05	3.44055e-05	1.09e-06	1.0189e-05	4.71e-07	13.0273	0.0852	0.000446449	1.4e-05	0.000133344	6.11e-06
MNP	0.70622	0.706186	2.78e-05	3.24751e-05	9.16e-07	7.42789e-06	3.92e-07	14.7853	0.109	0.000475917	1.35e-05	0.000108203	5.66e-06
MNP	0.706206	0.706172	3.01e-05	3.45022e-05	1.06e-06	7.82072e-06	4.83e-07	13.1567	0.0958	0.00044476	1.37e-05	0.000102813	6.36e-06
STD	0.709262	1.00003	2.67e-05	1.9567e-05	8.6e-07	3.62868e-06	4.34e-07	14.6286	0.104	0.000282332	1.24e-05	5.56989e-05	6.35e-06
MNP	0.70621	0.706188	2.63e-05	3.26636e-05	8.46e-07	6.13628e-06	4.79e-07	14.0595	0.089	0.000459002	1.22e-05	8.64021e-05	6.8e-06
MNP	0.706218	0.706196	3.04e-05	2.37483e-05	1.02e-06	4.27486e-06	3.62e-07	17.5607	0.0964	0.000415665	1.73e-05	7.4279e-05	6.47e-06
MNP	0.706209	0.706187	2.54e-05	3.35403e-05	9.7e-07	1.00565e-05	4.55e-07	13.8964	0.0694	0.000465826	1.34e-05	0.000138769	6.58e-06
MNP	0.706194	0.706172	2.26e-05	2.32826e-05	7.74e-07	6.78996e-06	4.34e-07	18.3106	0.0898	0.000426753	1.4e-05	0.00012361	7.82e-06
MNP	0.706146	0.706124	2.66e-05	2.52997e-05	8.6e-07	4.25839e-06	3.48e-07	16.8927	0.119	0.000422394	1.43e-05	6.96712e-05	5.57e-06
STD	0.709203	1	2.19e-05	2.14296e-05	7.43e-07	4.63302e-06	4.4e-07	14.6215	0.0912	0.000312781	1.08e-05	6.41003e-05	6.28e-06
MNP	0.706229	0.706229	3.29e-05	3.56845e-05	1.01e-06	8.50405e-06	4.25e-07	13.8649	0.0742	0.000494626	1.38e-05	0.000118735	5.96e-06
MNP	0.706237	0.706236	4.79e-05	0.000175663	5.53e-06	-5.05971e-06	3.94e-06	1.66853	0.0114	0.000293675	8.91e-06	-7.19311e-06	6.59e-06
MNP	0.706184	0.706184	3.26e-05	1.87477e-05	8.84e-07	7.38577e-06	4.35e-07	21.5154	0.131	0.000395629	1.89e-05	0.000170357	1.08e-05
MNP	0.70621	0.70621	2.91e-05	3.11292e-05	9.79e-07	6.22966e-06	4.07e-07	13.9893	0.0835	0.000430253	1.36e-05	8.67962e-05	5.62e-06
MNP	0.706178	0.706178	2.67e-05	2.47509e-05	7.15e-07	7.95664e-06	3.57e-07	18.481	0.0851	0.000452628	1.27e-05	0.000147352	6.31e-06
STD	0.709218	1.00002	2.62e-05	2.03899e-05	7.89e-07	4.5053e-06	4.39e-07	14.4517	0.0677	0.000296788	1.14e-05	6.51085e-05	6.3e-06
MNP	0.706164	0.706147	2.74e-05	2.59339e-05	7.71e-07	2.65551e-05	1.14e-06	17.782	0.121	0.000465846	1.35e-05	0.000473067	2.03e-05
MNP	0.706153	0.706136	1.8e-05	2.27402e-05	7.25e-07	9.54048e-06	5.64e-07	19.5832	0.0935	0.000442092	1.39e-05	0.000186411	1.1e-05
MNP	0.706215	0.706198	2.56e-05	2.39028e-05	8.85e-07	3.32512e-05	1.61e-06	18.6674	0.0738	0.000448162	1.66e-05	0.000672563	3.59e-05
MNP	0.706163	0.706145	2.5e-05	2.7397e-05	7.95e-07	1.18287e-05	6.06e-07	17.5753	0.103	0.000475866	1.34e-05	0.000208564	1.1e-05
MNP	0.7062	0.706183	2.38e-05	2.84208e-05	7.25e-07	2.59688e-05	9.42e-07	18.8888	0.125	0.000533071	1.34e-05	0.00048214	1.68e-05
STD	0.709237	1.00004	3.16e-05	2.07099e-05	1.01e-06	1.12895e-05	4.53e-07	13.1292	0.145	0.00027904	1.3e-05	0.000148527	5.63e-06
MNP	0.706163	0.706136	2.92e-05	2.34047e-05	7.87e-07	2.42051e-05	1.46e-06	17.3186	0.117	0.000408808	1.39e-05	0.000407056	2.35e-05
MNP	0.706193	0.706166	3e-05	2.64536e-05	9.91e-07	2.90026e-05	1.54e-06	18.0085	0.123	0.00047276	1.78e-05	0.000512152	2.67e-05
MNP	0.706198	0.706171	2.99e-05	2.32189e-05	9.86e-07	3.06524e-05	9.77e-07	19.7513	0.144	0.000452813	1.91e-05	0.00060664	1.94e-05
MNP	0.706164	0.706137	2.9e-05	1.78958e-05	9.83e-07	9.73154e-06	4.99e-07	21.6433	0.157	0.000389167	2.11e-05	0.000213008	1.1e-05
MNP	0.706196	0.706169	2.72e-05	2.42677e-05	9.02e-07	4.37355e-05	2.57e-06	20.0307	0.17	0.00047627	1.73e-05	0.000870586	5.1e-05
STD	0.709237	1.00002	2.62e-05	2.16165e-05	8.63e-07	1.22397e-06	4.02e-07	13.4503	0.0998	0.000288373	1.09e-05	1.80418e-05	5.35e-06
MNP	0.706171	0.706155	2.49e-05	2.14322e-05	9.37e-07	1.38235e-05	9.81e-07	16.7396	0.0746	0.000355106	1.57e-05	0.00022839	1.59e-05
MNP	0.706188	0.706172	2.86e-05	2.60239e-05	9.75e-07	1.82701e-05	7.74e-07	15.9596	0.0995	0.000414082	1.49e-05	0.000274367	8.99e-06
MNP	0.706179	0.706163	2.81e-05	2.19303e-05	9.52e-07	1.74189e-05	8.31e-07	19.3642	0.119	0.000419574	1.79e-05	0.000337828	1.59e-05
MNP	0.706175	0.706159	2.31e-05	1.88864e-05	6.96e-07	1.44642e-05	7.57e-07	20.0453	0.0974	0.000380118	1.39e-05	0.000290428	1.51e-05
MNP	0.706173	0.706157	2.94e-05	2.22256e-05	1.02e-06	4.51032e-05	1.99e-06	18.6214	0.203	0.000414096	1.86e-05	0.000846972	4.07e-05
STD	0.709216		2.21e-05	2.05289e-05	8.9e-07	3.89656e-06	3.96e-07	14.6486	0.083	0.000299075	1.3e-05	5.80257e-05	5.84e-06

## Sheet: MNP03
SampleName	87Sr/86Sr	'87Sr/86Sr_Corr'	SE	'84Kr/88Sr'	SE	'85Rb/88Sr'	SE	'88 Intens'	SE	'Kr84 (V)'	SE	'Rb85 (V)'	SE	'167Er2'	SE	'173Yb2'	SE
STD	0.709189	0.999993	1.3e-05	1.67787e-05	9.29e-07	5.17314e-06	4.93e-07	12.8336	0.0419	0.000212723	1.18e-05	6.65013e-05	6.29e-06	1.02402e-05	5.92e-06	-5.91162e-06	5.37e-06
MNP	0.706186	0.706191	1.82e-05	2.09422e-05	8.58e-07	4.70216e-05	1.36e-06	15.5079	0.0949	0.000321538	1.35e-05	0.000726854	1.94e-05	2.71627e-05	6.12e-06	3.02652e-05	5.43e-06
MNP	0.70616	0.706166	1.53e-05	1.71646e-05	6.82e-07	7.40437e-05	2.98e-06	18.0319	0.0801	0.000306122	1.21e-05	0.0013292	5.34e-05	2.39303e-05	5.77e-06	1.8424e-05	5.54e-06
MNP	0.706169	0.706175	1.51e-05	1.59961e-05	6.43e-07	5.96749e-05	1.96e-06	18.9334	0.0885	0.000301383	1.21e-05	0.00111535	3.41e-05	3.23928e-05	5.7e-06	1.14248e-05	5.51e-06
MNP	0.706158	0.706163	1.32e-05	2.14864e-05	6.64e-07	4.42079e-05	1.64e-06	16.5641	0.0703	0.000356612	1.09e-05	0.000728514	2.49e-05	2.96732e-05	5.3e-06	9.70011e-06	5.09e-06
STD	0.70922	1.00001	1.82e-05	1.73167e-05	1.15e-06	4.63692e-06	6.57e-07	12.3719	0.0463	0.000212849	1.41e-05	5.51821e-05	8.21e-06	1.01112e-05	8.49e-06	5.21743e-06	7.39e-06
MNP	0.706175	0.706165	1.41e-05	2.18444e-05	6.61e-07	5.35896e-05	3.09e-06	16.0198	0.0829	0.00035499	1.08e-05	0.000859035	4.91e-05	2.16761e-05	6.51e-06	1.89896e-05	6.25e-06
MNP	0.706193	0.706183	1.52e-05	2.86807e-05	7.61e-07	3.18114e-05	9.25e-07	12.6789	0.0549	0.000363369	9.64e-06	0.000401956	1.08e-05	2.70196e-05	5.54e-06	2.18235e-05	5.58e-06
MNP	0.706159	0.706149	1.32e-05	2.96331e-05	6.96e-07	1.6824e-05	6.04e-07	12.4571	0.0477	0.00036824	8.83e-06	0.000209095	7.43e-06	4.43005e-05	6.8e-06	3.25954e-05	5.43e-06
MNP	0.706178	0.706168	1.31e-05	2.33914e-05	6.11e-07	1.94121e-05	5.83e-07	14.647	0.0454	0.000342705	8.99e-06	0.000286677	8.73e-06	2.78838e-05	5.63e-06	2.34605e-05	5.89e-06
STD	0.70922	1.00001	1.39e-05	1.7242e-05	7.41e-07	6.45318e-06	4.53e-07	12.3987	0.0505	0.000217888	9.46e-06	8.00158e-05	5.57e-06	-1.56328e-06	6.2e-06	-1.95768e-05	5.33e-06
MNP	0.706164	0.706158	1.38e-05	1.77013e-05	6.26e-07	1.47671e-05	5.21e-07	18.1564	0.0749	0.000316008	1.1e-05	0.000266753	9.53e-06	2.11513e-05	5.62e-06	4.28899e-06	5.63e-06
MNP	0.706191	0.706185	2.01e-05	2.06421e-05	1.19e-06	1.6257e-05	8.47e-07	9.16892	0.148	0.000189381	1.11e-05	0.000151644	7.48e-06	2.41658e-05	6.34e-06	1.3034e-05	6.74e-06
MNP	0.706183	0.706177	1.61e-05	2.17797e-05	8.76e-07	1.60401e-05	8.83e-07	14.5262	0.0753	0.000314332	1.26e-05	0.000234755	1.38e-05	2.03877e-05	5.82e-06	9.12779e-06	5.11e-06
MNP	0.706174	0.706168	1.6e-05	2.16821e-05	7.02e-07	2.84876e-05	8.33e-07	15.683	0.087	0.000338251	1.11e-05	0.000443855	1.36e-05	2.48183e-05	5.51e-06	8.30628e-06	5.74e-06
STD	0.709213	0.999993	1.67e-05	1.71259e-05	9.55e-07	2.66211e-06	5.25e-07	11.6412	0.0449	0.000200482	1.11e-05	3.08997e-05	6.1e-06	1.97167e-05	5.72e-06	-4.5709e-06	5.23e-06
MNP	0.70619	0.706195	1.4e-05	2.39334e-05	8.22e-07	6.15769e-05	2.15e-06	13.8076	0.057	0.000330725	1.15e-05	0.000844924	2.96e-05	2.23848e-05	6.02e-06	1.96497e-05	5.23e-06
MNP	0.706126	0.706131	1.8e-05	3.87488e-05	1.46e-06	4.56629e-05	1.66e-06	7.15277	0.0121	0.000277074	1.05e-05	0.000321571	1.14e-05	3.23091e-05	5.94e-06	8.76182e-06	5.03e-06
MNP	0.706192	0.706197	1.53e-05	3.25915e-05	9.87e-07	5.40355e-05	1.96e-06	10.4741	0.057	0.000343765	1.06e-05	0.000565061	2e-05	2.59132e-05	6.43e-06	2.17854e-05	6.13e-06
MNP	0.706181	0.706186	1.3e-05	2.11419e-05	7.01e-07	0.000137999	4.69e-06	15.05	0.0739	0.000315659	1.02e-05	0.00206834	7.21e-05	2.43461e-05	6.41e-06	1.24384e-05	5.11e-06
STD	0.709197	1.00001	1.36e-05	1.51893e-05	8.97e-07	5.09309e-06	4.82e-07	12.1282	0.0522	0.000183286	1.08e-05	5.94675e-05	5.95e-06	1.31298e-05	5.98e-06	-1.23003e-05	5.49e-06
MNP	0.706175	0.70617	1.8e-05	1.47501e-05	7.57e-07	2.66896e-05	1.24e-06	17.0934	0.115	0.000258351	1.34e-05	0.000452931	1.93e-05	1.20128e-05	5.93e-06	8.6773e-06	5.63e-06
MNP	0.70616	0.706156	1.27e-05	1.50896e-05	6.54e-07	5.1589e-05	1.5e-06	18.0063	0.0934	0.000276338	1.21e-05	0.000923795	2.52e-05	2.10321e-05	5.43e-06	-1.10205e-06	6.1e-06
MNP	0.706156	0.706151	1.49e-05	1.5025e-05	6.56e-07	4.79092e-05	1.61e-06	17.6197	0.0835	0.000264817	1.15e-05	0.000844297	2.78e-05	2.1585e-05	5.44e-06	3.18874e-06	5.47e-06
MNP	0.706149	0.706145	1.16e-05	1.67382e-05	7.29e-07	7.58061e-05	4.71e-06	17.1575	0.0712	0.000288428	1.23e-05	0.00128085	7.79e-05	1.92993e-05	5.74e-06	4.70422e-06	5.95e-06
STD	0.709232	1.00004	1.42e-05	1.68675e-05	8.38e-07	3.29343e-06	4.85e-07	11.7155	0.0394	0.000198126	9.76e-06	3.89502e-05	5.58e-06	8.86269e-06	5.78e-06	-9.80384e-07	5.07e-06
MNP	0.706195	0.70617	1.23e-05	1.55705e-05	6.5e-07	3.7376e-05	8.72e-07	17.274	0.0563	0.00026976	1.13e-05	0.00064827	1.57e-05	1.66518e-05	5.42e-06	4.41978e-06	6.09e-06
MNP	0.706181	0.706155	1.29e-05	1.9609e-05	6.66e-07	5.92659e-05	1.92e-06	16.1727	0.0976	0.000316285	1.09e-05	0.00100836	3.52e-05	3.05154e-05	6.6e-06	2.46784e-05	5.61e-06
MNP	0.706163	0.706138	1.41e-05	1.78124e-05	5.64e-07	3.32384e-05	9.7e-07	17.3525	0.0962	0.000309476	9.91e-06	0.000567411	1.43e-05	9.05965e-06	6.2e-06	1.76134e-05	4.97e-06
MNP	0.706202	0.706176	1.44e-05	2.38563e-05	8.27e-07	1.87988e-05	6.27e-07	13.6843	0.0709	0.000326742	1.14e-05	0.000260645	8.75e-06	3.55166e-05	5.83e-06	4.68145e-06	6.04e-06
STD	0.70924	1.00003	1.55e-05	1.54073e-05	8.54e-07	4.20399e-06	4.49e-07	11.5408	0.0485	0.000177597	1e-05	5.02373e-05	5.31e-06	-8.83572e-06	6.26e-06	-1.15276e-05	5.77e-06
MNP	0.706193	0.706173	1.35e-05	2.32168e-05	7.97e-07	4.16048e-05	8.65e-07	14.5386	0.0681	0.000335364	1.18e-05	0.000599639	1.1e-05	5.28785e-05	5.63e-06	1.91833e-05	4.83e-06
MNP	0.706198	0.706178	1.34e-05	2.50654e-05	7.42e-07	4.47102e-05	2.47e-06	14.3379	0.0785	0.000356406	1.09e-05	0.000620551	3.08e-05	3.63683e-05	5.59e-06	3.58033e-05	5.39e-06
MNP	0.706197	0.706177	1.65e-05	2.67351e-05	8.33e-07	6.74014e-05	2.37e-06	13.4533	0.0685	0.000361343	1.14e-05	0.00089129	2.85e-05	3.41088e-05	6.69e-06	2.8623e-05	5.58e-06
MNP	0.706209	0.706189	1.39e-05	2.56226e-05	7.7e-07	1.22526e-05	5.56e-07	13.4899	0.0431	0.000342741	1.03e-05	0.000166192	7.46e-06	3.85941e-05	5.86e-06	2.97252e-05	6.14e-06
STD	0.70922	1.00001	1.38e-05	1.50047e-05	8.15e-07	1.99451e-06	5.36e-07	10.7296	0.0766	0.000161522	8.77e-06	2.24153e-05	5.82e-06	-1.7788e-05	5.81e-06	-1.61105e-05	5.43e-06
MNP	0.706186	0.706182	1.63e-05	2.8229e-05	8.15e-07	1.53707e-05	7.21e-07	11.212	0.0283	0.000320819	9.54e-06	0.000174078	8.18e-06	3.63644e-05	5.58e-06	2.587e-05	5.23e-06
MNP	0.706159	0.706155	1.26e-05	1.5838e-05	7.07e-07	3.92205e-05	1.24e-06	16.551	0.0668	0.000264684	1.18e-05	0.000656494	2.04e-05	2.07129e-05	6.2e-06	-1.2521e-05	6.22e-06
MNP	0.706202	0.706198	1.55e-05	1.54654e-05	6.27e-07	5.19169e-05	1.14e-06	17.2955	0.106	0.000268911	1.08e-05	0.000882559	1.97e-05	1.51856e-05	5.61e-06	1.31849e-05	5.76e-06
MNP	0.706154	0.706151	1.65e-05	1.73646e-05	6.75e-07	6.50191e-05	1.84e-06	16.3412	0.0972	0.000283123	1.1e-05	0.00108245	3.11e-05	9.24803e-06	7.15e-06	5.89629e-06	5.56e-06
STD	0.709208	0.999998	1.5e-05	1.41428e-05	8.73e-07	3.51112e-06	5e-07	11.309	0.0252	0.000161736	9.74e-06	3.99291e-05	5.63e-06	7.48379e-07	6.45e-06	-1.90331e-05	5.9e-06
MNP	0.706149	0.706151	1.39e-05	2.17043e-05	8.02e-07	2.59282e-05	1.33e-06	12.6434	0.067	0.000277173	1.01e-05	0.000322281	1.59e-05	1.01207e-05	5.42e-06	6.21568e-07	5.21e-06
MNP	0.706167	0.706168	1.36e-05	2.19096e-05	9.29e-07	9.62506e-06	5.26e-07	12.0538	0.0522	0.000266618	1.15e-05	0.000117214	6.25e-06	1.54167e-05	5.63e-06	9.98948e-06	5.16e-06
MNP	0.706182	0.706183	1.6e-05	2.00885e-05	8.23e-07	3.56498e-05	1.28e-06	12.4596	0.0446	0.000251639	1.03e-05	0.000438479	1.53e-05	1.04748e-05	6.34e-06	-2.55881e-06	6.19e-06
MNP	0.70619	0.706191	2.14e-05	3.84234e-05	1.17e-06	5.58071e-05	2.1e-06	6.56862	0.0568	0.000247453	7.55e-06	0.000353182	1.11e-05	2.70526e-05	5.75e-06	1.04263e-05	5.68e-06
STD	0.70921	0.999996	1.74e-05	1.68012e-05	9.1e-07	1.05799e-06	4.89e-07	11.187	0.0408	0.000187879	1.01e-05	1.17967e-05	5.45e-06	2.15358e-06	5.28e-06	-1.72071e-05	5.16e-06
MNP	0.706204	0.706207	1.43e-05	2.44406e-05	8.61e-07	2.84158e-05	7.51e-07	11.2477	0.0768	0.000273747	9.68e-06	0.00032915	8.46e-06	2.18197e-05	6.04e-06	1.35114e-05	5.87e-06
MNP	0.706179	0.706181	1.54e-05	1.94002e-05	7.98e-07	2.16549e-05	6.78e-07	14.9996	0.0643	0.000290558	1.21e-05	0.000325854	9.45e-06	2.40919e-05	5.55e-06	2.35337e-05	5.72e-06
MNP	0.706208	0.706211	1.38e-05	2.22399e-05	7.97e-07	3.68098e-05	9.81e-07	13.6006	0.0677	0.000303478	1.06e-05	0.000505218	1.33e-05	2.00093e-05	5.22e-06	1.82449e-05	5.81e-06
MNP	0.706179	0.706182	1.46e-05	1.9105e-05	6.69e-07	1.03953e-05	4.58e-07	14.0568	0.0656	0.000266767	9.31e-06	0.000146586	6.44e-06	1.6502e-05	5.92e-06	1.89235e-05	5.83e-06
STD	0.709204	0.999992	1.36e-05	1.66606e-05	9.85e-07	4.4357e-06	4.65e-07	11.042	0.0349	0.000179529	1.07e-05	4.8464e-05	5.11e-06	3.28278e-06	5.7e-06	1.06399e-05	5.61e-06
MNP	0.706165	0.706171	1.45e-05	1.95625e-05	6.62e-07	6.18376e-06	4.36e-07	14.6359	0.0761	0.000285114	9.83e-06	8.97079e-05	6.31e-06	3.11316e-05	6.11e-06	3.55422e-05	6.71e-06
MNP	0.706167	0.706173	1.58e-05	1.55117e-05	7.17e-07	8.21468e-06	4.77e-07	15.7232	0.056	0.000243044	1.14e-05	0.000129468	7.41e-06	2.45768e-05	5.27e-06	1.53326e-05	5.73e-06
MNP	0.706156	0.706161	1.32e-05	1.67968e-05	6.09e-07	4.03143e-06	4.2e-07	15.6378	0.07	0.000263445	9.69e-06	6.38432e-05	6.59e-06	2.42895e-05	6.22e-06	1.41051e-05	5.64e-06
MNP	0.706161	0.706167	1.3e-05	1.86039e-05	6.41e-07	1.39462e-05	8.97e-07	14.4219	0.0703	0.000268336	9.24e-06	0.000194963	1.22e-05	2.25261e-05	6.02e-06	1.45171e-05	6.04e-06
STD	0.709205	1.00001	1.5e-05	1.7624e-05	8.51e-07	3.2592e-07	4.91e-07	11.2315	0.0424	0.00019823	9.58e-06	4.73868e-06	5.66e-06	8.89842e-07	5.72e-06	-8.09841e-07	5.64e-06
MNP	0.706202	0.706194	1.62e-05	2.62447e-05	9.17e-07	2.12811e-05	6.69e-07	11.2461	0.0454	0.000294537	1.03e-05	0.000238901	7.64e-06	2.92011e-05	5.61e-06	2.33569e-05	6.08e-06
MNP	0.706217	0.70621	1.3e-05	2.94632e-05	8.26e-07	2.61623e-05	1.21e-06	11.4855	0.0547	0.000338118	9.3e-06	0.000299191	1.42e-05	2.83432e-05	5.71e-06	3.09973e-05	4.86e-06
MNP	0.706244	0.706237	1.57e-05	2.72555e-05	9.21e-07	1.67688e-05	6.96e-07	11.2821	0.0671	0.000310771	1.07e-05	0.000189856	7.66e-06	3.88535e-05	6.27e-06	1.26741e-05	6.38e-06
MNP	0.706202	0.706194	1.34e-05	1.91247e-05	6.73e-07	3.16336e-05	1.11e-06	14.9516	0.0604	0.000285455	1e-05	0.000469694	1.53e-05	3.40374e-05	5.68e-06	2.48399e-05	5.99e-06
STD	0.70923	1.00002	1.51e-05	1.67229e-05	9.71e-07	2.4041e-06	5.24e-07	11.0202	0.037	0.000186331	1.08e-05	2.63102e-05	5.76e-06	1.57433e-05	5.81e-06	1.93085e-06	6.12e-06
MNP	0.706218	0.706206	1.44e-05	1.85301e-05	6.85e-07	2.42225e-05	1.28e-06	14.9841	0.0646	0.000279024	1.04e-05	0.000353302	1.77e-05	1.56181e-05	6.1e-06	2.98185e-05	5.98e-06
MNP	0.706191	0.706178	1.53e-05	2.2375e-05	8.3e-07	3.17794e-05	1.47e-06	14.5873	0.125	0.000324338	1.16e-05	0.00045613	2.11e-05	5.11231e-05	5.93e-06	2.74437e-05	5.89e-06
MNP	0.706181	0.706168	1.2e-05	1.75111e-05	6.94e-07	6.74272e-05	2.55e-06	14.916	0.0817	0.000263651	1.05e-05	0.00101038	3.89e-05	1.74332e-05	5.79e-06	1.02731e-05	5.58e-06
MNP	0.706171	0.706158	1.47e-05	1.95107e-05	7.85e-07	2.58534e-05	1.07e-06	14.4665	0.0643	0.000279534	1.12e-05	0.000368131	1.41e-05	4.0556e-05	5.88e-06	2.61305e-05	5.79e-06
STD	0.709216	1.00003	1.52e-05	1.44441e-05	9.4e-07	2.53807e-06	5.67e-07	10.562	0.0403	0.000150161	9.83e-06	2.56311e-05	5.89e-06	-5.23974e-06	6.07e-06	-2.66573e-06	6.23e-06
MNP	0.706167	0.706147	1.3e-05	1.56296e-05	6.06e-07	3.21406e-05	1.55e-06	15.784	0.072	0.000248298	9.78e-06	0.000513157	2.67e-05	1.61695e-05	6.18e-06	-7.76498e-07	5.95e-06
MNP	0.706206	0.706187	1.15e-05	1.4366e-05	6.88e-07	1.72076e-05	6.71e-07	16.2343	0.0806	0.000234568	1.14e-05	0.00027623	1.04e-05	1.55055e-05	5.85e-06	9.7393e-06	5.8e-06
MNP	0.706216	0.706196	1.66e-05	2.1217e-05	8.11e-07	5.48727e-05	1.85e-06	12.8537	0.109	0.000266861	1.01e-05	0.000683084	1.96e-05	1.76407e-05	5.31e-06	-1.79618e-05	6.47e-06
MNP	0.706183	0.706163	1.37e-05	1.24223e-05	6.49e-07	3.49233e-05	1.01e-06	24.3088	0.205	0.000296995	1.5e-05	0.000819863	2.43e-05	2.01058e-05	6.28e-06	-6.6012e-06	7.35e-06
STD	0.709244		1.53e-05	1.58909e-05	9.11e-07	4.07637e-06	4.94e-07	10.8854	0.0461	0.000177813	9.94e-06	4.46797e-05	5.41e-06	-1.38189e-05	5.27e-06	-1.16663e-05	5.86e-06
STD	0.709229	1.00003	1.52e-05	1.5275e-05	8.85e-07	3.38014e-06	5.64e-07	10.9826	0.0356	0.000165829	9.65e-06	3.47839e-05	6.16e-06	-1.73154e-05	5.36e-06	-5.29996e-05	5.79e-06
MNP	0.706204	0.706185	1.39e-05	2.1358e-05	9.63e-07	5.30906e-06	5.42e-07	11.9816	0.0575	0.000255554	1.14e-05	6.54123e-05	6.69e-06	1.65507e-05	6.14e-06	-5.01265e-05	6.52e-06
MNP	0.706177	0.706158	1.54e-05	1.97602e-05	6.93e-07	5.11193e-06	4.35e-07	12.8355	0.0754	0.000251944	8.88e-06	6.44659e-05	5.41e-06	1.57901e-05	6.08e-06	-3.78364e-05	5.94e-06
MNP	0.70618	0.706161	1.17e-05	1.9784e-05	7.94e-07	3.92802e-06	4.63e-07	12.4883	0.0569	0.000249024	1.01e-05	5.10387e-05	5.85e-06	1.18507e-05	5e-06	-2.05414e-05	5.81e-06
MNP	0.706196	0.706177	1.37e-05	1.99681e-05	7.63e-07	4.81114e-06	4.54e-07	13.0468	0.0624	0.000260559	9.95e-06	6.3653e-05	5.94e-06	1.06047e-05	5.22e-06	-4.38917e-05	6.18e-06
STD	0.709229	1.00002	1.4e-05	1.56983e-05	8.64e-07	2.65682e-06	5.31e-07	9.9436	0.0575	0.000156813	8.76e-06	2.55727e-05	5.18e-06	-1.09251e-05	5.29e-06	-4.13917e-05	5.18e-06
MNP	0.706205	0.706192	1.5e-05	2.2198e-05	7.43e-07	5.51165e-06	4.57e-07	12.1672	0.0539	0.000266473	9.36e-06	6.9555e-05	5.73e-06	2.70707e-05	6.15e-06	1.05671e-05	7.42e-06
MNP	0.7062	0.706186	1.46e-05	2.2774e-05	1.38e-06	5.8077e-06	4.68e-07	12.1479	0.0783	0.000276447	1.75e-05	7.27963e-05	5.75e-06	2.01186e-05	6.59e-06	1.71885e-05	6.03e-06
MNP	0.706163	0.706149	1.33e-05	1.6696e-05	6.89e-07	5.25713e-06	4.36e-07	14.1291	0.0641	0.000236997	9.79e-06	7.16726e-05	6e-06	8.46384e-06	5.81e-06	7.21212e-06	6.06e-06
MNP	0.706164	0.706151	1.42e-05	1.90535e-05	8.75e-07	6.05876e-06	4.65e-07	13.6839	0.0609	0.000253515	1.18e-05	8.20836e-05	6.52e-06	1.21284e-05	6e-06	1.41929e-05	6.28e-06
STD	0.709218	1.00002	1.37e-05	1.69034e-05	8.62e-07	5.99286e-06	6.11e-07	10.5312	0.0439	0.000177556	9.02e-06	6.23042e-05	6.25e-06	-8.51217e-06	5.61e-06	-8.07139e-06	6.37e-06
MNP	0.706189	0.706172	1.3e-05	1.75166e-05	6.44e-07	5.97579e-06	4.94e-07	15.6172	0.0755	0.000271055	1.01e-05	9.29982e-05	7.73e-06	2.70411e-05	6.35e-06	1.12457e-05	6.58e-06
MNP	0.706194	0.706176	1.32e-05	1.62675e-05	6.86e-07	3.1118e-06	4.17e-07	14.6142	0.068	0.000237513	9.99e-06	4.61168e-05	6.01e-06	1.15317e-05	5.5e-06	2.67164e-05	6.15e-06
MNP	0.706187	0.70617	1.55e-05	2.08494e-05	8.92e-07	5.91839e-06	4.48e-07	12.1486	0.0978	0.000247842	1.06e-05	7.40461e-05	5.51e-06	9.23504e-06	5.92e-06	4.16251e-05	6.09e-06
MNP	0.706172	0.706155	1.36e-05	1.86317e-05	6.52e-07	4.89176e-06	4.99e-07	12.6487	0.0619	0.000236509	8.26e-06	6.08734e-05	6.15e-06	2.50548e-05	5.01e-06	2.23451e-05	6.47e-06
STD	0.709237	1.00002	1.53e-05	1.55789e-05	9.87e-07	6.70435e-06	5.69e-07	10.3578	0.0313	0.000161546	1.03e-05	7.04216e-05	5.94e-06	1.0609e-05	5.25e-06	2.61252e-05	5.52e-06
MNP	0.70618	0.706166	1.56e-05	1.74379e-05	7.5e-07	4.56954e-06	3.54e-07	14.139	0.0476	0.000249458	1.07e-05	6.40595e-05	5.06e-06	2.0301e-05	5.76e-06	2.45819e-05	5.79e-06
MNP	0.706185	0.706171	1.08e-05	1.43953e-05	6.27e-07	8.84005e-06	4.93e-07	15.4948	0.0681	0.000230314	9.66e-06	0.000136363	7.59e-06	1.2653e-05	5.15e-06	3.72889e-05	5.12e-06
MNP	0.706216	0.706202	1.37e-05	1.85082e-05	7.74e-07	6.05815e-06	4.04e-07	12.7488	0.0591	0.000234538	1e-05	7.8256e-05	5.05e-06	1.65051e-05	5.17e-06	1.65902e-05	6.12e-06
MNP	0.706187	0.706173	1.32e-05	1.93965e-05	7.34e-07	5.03093e-06	4.81e-07	12.7768	0.058	0.000246952	9.47e-06	6.50708e-05	6.31e-06	2.0633e-05	5.77e-06	1.27753e-05	6.06e-06
STD	0.709212	0.999997	1.59e-05	1.55286e-05	9.49e-07	1.7972e-06	5.37e-07	10.142	0.0392	0.000159045	9.53e-06	1.9063e-05	5.36e-06	2.7044e-06	5.42e-06	-3.15615e-05	5.95e-06
MNP	0.706171	0.706173	1.26e-05	1.73005e-05	7.33e-07	4.74758e-06	4.19e-07	12.8485	0.0587	0.000224521	9.79e-06	6.07227e-05	5.34e-06	1.68568e-05	5.53e-06	-7.1593e-06	5.95e-06
MNP	0.706162	0.706164	1.59e-05	2.54885e-05	1.06e-06	5.49191e-06	5.43e-07	9.60167	0.0538	0.000238736	9.9e-06	5.36451e-05	5.25e-06	1.77914e-05	5.45e-06	-4.26682e-06	5.48e-06
MNP	0.706177	0.706179	1.44e-05	2.60947e-05	9.1e-07	7.20824e-06	5.85e-07	9.59584	0.0461	0.000253942	8.98e-06	6.7585e-05	5.75e-06	2.15926e-05	5.42e-06	9.71834e-06	5.52e-06
MNP	0.706166	0.706168	1.51e-05	2.31657e-05	8.05e-07	5.93983e-06	5.43e-07	9.78573	0.0419	0.000230744	8.05e-06	5.9115e-05	5.41e-06	3.58667e-05	5.77e-06	-2.20347e-05	6.46e-06
STD	0.709204	0.999993	1.57e-05	1.6424e-05	1.03e-06	4.40838e-06	5.53e-07	9.62465	0.0341	0.000163231	9.66e-06	4.32806e-05	5.39e-06	1.46353e-05	5.69e-06	-5.14191e-05	6.03e-06
MNP	0.706168	0.706173	1.37e-05	1.80926e-05	6.33e-07	7.73064e-06	4.87e-07	13.5093	0.0767	0.000244307	8.6e-06	0.000106805	6.64e-06	1.44437e-05	5.81e-06	-3.38211e-05	6.6e-06
MNP	0.706152	0.706157	1.4e-05	1.77706e-05	7.35e-07	1.02398e-05	4.92e-07	13.1827	0.0645	0.000235482	9.42e-06	0.000135146	6.51e-06	2.06142e-05	5.14e-06	-1.10632e-05	6.95e-06
MNP	0.706179	0.706183	1.5e-05	2.19132e-05	8.44e-07	1.10312e-05	6.15e-07	10.8956	0.0479	0.000238709	9.21e-06	0.000119877	6.42e-06	2.18658e-05	5.85e-06	-1.69569e-05	6.57e-06
MNP	0.70619	0.706194	1.39e-05	1.78784e-05	6.88e-07	1.27362e-05	5.76e-07	14.4704	0.0669	0.000256342	9.84e-06	0.000189038	8.93e-06	1.54351e-05	6.51e-06	-2.67637e-05	7.17e-06
STD	0.709206	1.00001	1.48e-05	1.62327e-05	8.96e-07	3.12608e-06	5.75e-07	10.2555	0.0265	0.000167825	9.26e-06	3.20003e-05	5.89e-06	2.31288e-06	5.58e-06	-6.77499e-05	7.06e-06
MNP	0.706164	0.706158	1.23e-05	1.77246e-05	7.03e-07	6.51641e-06	4.05e-07	14.0749	0.0682	0.000252546	9.99e-06	9.21474e-05	5.73e-06	1.87739e-05	6.12e-06	-1.64516e-06	6.41e-06
MNP	0.706193	0.706187	1.32e-05	1.73905e-05	6.82e-07	1.71805e-05	4.9e-07	14.8494	0.0713	0.000258046	1.01e-05	0.000253312	7.32e-06	2.33773e-05	5.48e-06	-8.90151e-06	6.76e-06
MNP	0.706154	0.706149	1.4e-05	1.58938e-05	6.42e-07	1.27608e-05	5.46e-07	15.2284	0.0639	0.000239261	9.93e-06	0.00019321	7.85e-06	2.3284e-05	5.52e-06	-1.09748e-05	5.9e-06
MNP	0.706184	0.706179	1.32e-05	1.63088e-05	7.49e-07	7.4667e-06	5.19e-07	15.1006	0.0685	0.000248391	1.12e-05	0.000111347	7.75e-06	2.55267e-05	6.12e-06	-4.43407e-06	6.07e-06
STD	0.709225	1.00002	4.29e-05	2.09447e-05	3.59e-06	-9.72533e-07	2.15e-06	3.35345	0.208	8.20294e-05	1.1e-05	1.86359e-07	5.67e-06	4.83812e-06	5.98e-06	-3.60026e-05	7.63e-06
MNP	0.70618	0.706166	1.34e-05	1.80577e-05	7.14e-07	7.31722e-06	5.44e-07	13.1333	0.0543	0.000236908	9.32e-06	9.60665e-05	7.16e-06	1.41972e-05	5.41e-06	-4.03643e-06	6.45e-06
MNP	0.706172	0.706158	1.51e-05	1.85434e-05	8.62e-07	5.35069e-06	5.39e-07	12.7955	0.0651	0.000234196	1.09e-05	6.97678e-05	6.93e-06	2.32954e-05	5.6e-06	1.21014e-05	6.2e-06
MNP	0.706189	0.706175	1.34e-05	2.01061e-05	7.99e-07	1.67726e-05	6.45e-07	12.4846	0.0645	0.00025352	1.01e-05	0.000213295	8.23e-06	9.0317e-06	6.54e-06	1.46986e-05	6.87e-06
MNP	0.70617	0.706155	1.27e-05	1.57421e-05	7.35e-07	1.62337e-05	6.81e-07	14.424	0.062	0.000225568	1.07e-05	0.000231771	9.37e-06	2.36595e-05	5.83e-06	-1.82344e-05	6.09e-06
STD	0.709224	1.00001	1.73e-05	1.48933e-05	9.31e-07	2.63725e-06	5.2e-07	10.333	0.037	0.000155851	9.75e-06	2.6149e-05	5.42e-06	1.12868e-06	6.02e-06	-4.55419e-05	6.88e-06
MNP	0.706172	0.706166	1.39e-05	1.83201e-05	7.17e-07	1.58084e-05	7.88e-07	13.716	0.0686	0.000251365	9.93e-06	0.000219411	1.11e-05	2.31382e-05	5.42e-06	-1.55687e-05	6.5e-06
MNP	0.706188	0.706183	1.22e-05	1.8904e-05	7.93e-07	4.18217e-06	4.31e-07	13.1603	0.0633	0.000246506	1.03e-05	5.63197e-05	5.73e-06	1.81035e-05	5.74e-06	-2.99011e-06	5.74e-06
MNP	0.706194	0.706188	1.36e-05	1.84601e-05	8.31e-07	4.65252e-06	4.4e-07	12.2849	0.0498	0.000226579	1.01e-05	5.80959e-05	5.31e-06	3.00375e-05	5.41e-06	5.07227e-06	6.27e-06
MNP	0.706137	0.706131	1.31e-05	1.79777e-05	7.33e-07	3.32476e-06	4.4e-07	13.4824	0.0636	0.000241503	9.86e-06	4.35919e-05	5.88e-06	2.15036e-05	5.35e-06	-7.76876e-06	5.58e-06
STD	0.709207	1.00002	1.45e-05	1.54681e-05	8.91e-07	4.20963e-06	5.57e-07	9.8433	0.0199	0.000153524	8.84e-06	4.14724e-05	5.49e-06	1.11999e-05	5.27e-06	-1.68084e-05	4.76e-06
MNP	0.706192	0.706175	1.44e-05	1.89706e-05	7.45e-07	1.37721e-05	5.64e-07	11.76	0.0533	0.000223233	8.76e-06	0.000161158	7.14e-06	2.48266e-05	5.85e-06	-3.9593e-06	5.59e-06
MNP	0.706152	0.706134	1.5e-05	1.78357e-05	8.91e-07	6.53754e-06	5.39e-07	12.1653	0.0474	0.000219477	1.07e-05	7.7115e-05	6.45e-06	1.94605e-05	5.79e-06	-2.91637e-06	5.63e-06
MNP	0.706186	0.706168	1.35e-05	1.98709e-05	7.33e-07	5.42264e-06	4.63e-07	11.455	0.0586	0.000227985	8.37e-06	6.16094e-05	5.1e-06	1.94767e-05	5.38e-06	4.48152e-06	6.6e-06
MNP	0.706196	0.706178	1.53e-05	2.37336e-05	9.16e-07	4.05804e-06	5.56e-07	9.8993	0.0452	0.000234667	8.76e-06	4.0287e-05	5.5e-06	4.00325e-05	5.77e-06	1.55789e-05	7.5e-06
STD	0.709248	1.00005	1.5e-05	1.50675e-05	8.89e-07	6.48493e-06	5.52e-07	10.0601	0.0398	0.000149657	8.74e-06	6.52975e-05	5.56e-06	1.42733e-06	5.58e-06	-1.51021e-05	5.95e-06
MNP	0.706195	0.706162	1.46e-05	2.45583e-05	8.87e-07	6.5707e-06	6.3e-07	9.902	0.0419	0.000242147	8.84e-06	6.53542e-05	6.29e-06	2.36027e-05	6.09e-06	1.89261e-05	5.36e-06
MNP	0.706217	0.706183	1.23e-05	1.51611e-05	6.27e-07	4.49413e-06	4.14e-07	14.7401	0.0626	0.000219738	8.96e-06	6.67352e-05	6.14e-06	1.38914e-05	5.77e-06	-9.14107e-06	7.07e-06
MNP	0.706195	0.706162	1.46e-05	1.86395e-05	8.37e-07	8.72903e-06	4.72e-07	12.9753	0.0861	0.000241211	1.08e-05	0.000111832	5.95e-06	3.57489e-05	6.49e-06	1.86069e-05	7.53e-06
MNP	0.706185	0.706151	1.41e-05	1.94056e-05	8.61e-07	3.7687e-05	8.53e-07	12.2605	0.047	0.000240028	1.04e-05	0.000463882	1.03e-05	3.27882e-05	6.08e-06	1.78505e-05	7.27e-06
STD	0.709241	1.00004	1.95e-05	1.5957e-05	1.41e-06	3.40429e-06	8.12e-07	7.34033	0.112	0.000119614	1.01e-05	2.58121e-05	6.03e-06	1.5802e-05	5.74e-06	1.28912e-05	7.02e-06
MNP	0.706192	0.706167	1.63e-05	2.12391e-05	8.99e-07	9.43597e-06	5.95e-07	11.4843	0.0481	0.00024453	1.04e-05	0.000110145	6.72e-06	1.35417e-05	5.83e-06	5.29117e-06	7.38e-06
MNP	0.70618	0.706155	1.31e-05	1.96209e-05	8.33e-07	2.4078e-05	1.08e-06	11.2834	0.0328	0.000221443	9.49e-06	0.000271006	1.2e-05	1.55551e-05	5.2e-06	-2.12137e-06	6.68e-06
MNP	0.706192	0.706166	1.33e-05	1.91918e-05	7.09e-07	3.2152e-05	1.2e-06	12.2968	0.0658	0.000238839	8.53e-06	0.000382187	1.28e-05	2.78628e-05	5.24e-06	1.4523e-05	6.76e-06
MNP	0.706172	0.706147	1.4e-05	2.0877e-05	8.39e-07	1.6625e-05	6.75e-07	10.8024	0.0547	0.000223657	8.87e-06	0.00018215	7.09e-06	2.30516e-05	5.26e-06	2.00276e-05	6.37e-06
STD	0.709231	1.00001	1.64e-05	1.75036e-05	1.04e-06	2.62648e-06	5.99e-07	10.1231	0.0349	0.000175487	1.05e-05	2.91027e-05	6.2e-06	1.29283e-05	6.21e-06	-4.13485e-05	6.42e-06
MNP	0.706208	0.706201	1.91e-05	2.12818e-05	9.53e-07	2.90342e-05	1.14e-06	10.8103	0.0565	0.000236001	1.05e-05	0.000315095	1.2e-05	2.17225e-05	6e-06	2.49251e-05	6.71e-06
MNP	0.70619	0.706183	1.31e-05	2.05907e-05	7.23e-07	6.14516e-05	4.66e-06	12.6952	0.0641	0.000264896	9.39e-06	0.000595036	3.24e-05	1.75751e-05	5.47e-06	1.47647e-05	6.88e-06
MNP	0.706184	0.706177	1.44e-05	2.06694e-05	8.64e-07	1.40769e-05	7.46e-07	11.2	0.0445	0.000233464	9.82e-06	0.000157299	8.17e-06	1.74895e-05	6.11e-06	1.23214e-05	7.15e-06
MNP	0.706191	0.706184	1.58e-05	2.18649e-05	8.36e-07	3.06918e-05	1.99e-06	10.9414	0.062	0.000238721	9.24e-06	0.000319566	2.01e-05	3.14029e-05	5.85e-06	2.55954e-05	6.22e-06
STD	0.709204	0.999991	1.81e-05	1.69693e-05	9.4e-07	4.78064e-06	5.88e-07	10.1508	0.0409	0.000172547	9.71e-06	4.67955e-05	6e-06	-2.39074e-06	5.76e-06	-1.23715e-05	5.53e-06
MNP	0.706184	0.70619	1.29e-05	1.81416e-05	7.52e-07	1.16034e-05	8.42e-07	12.364	0.0592	0.000224199	9.43e-06	0.000149705	1.08e-05	3.04042e-05	5e-06	1.51035e-05	6.72e-06
MNP	0.706141	0.706148	1.5e-05	1.77544e-05	8.41e-07	2.24046e-05	8.2e-07	13.7855	0.0321	0.000245303	1.17e-05	0.000306604	1.09e-05	1.27918e-05	6.45e-06	-7.51638e-06	5.46e-06
MNP	0.70621	0.706217	1.36e-05	1.53234e-05	7.28e-07	1.63776e-05	5.36e-07	15.113	0.061	0.000230956	1.13e-05	0.000247937	7.91e-06	1.61733e-05	5.33e-06	-2.30091e-06	5.68e-06
MNP	0.706144	0.706151	1.2e-05	1.91582e-05	8.07e-07	1.26393e-05	6.79e-07	13.0679	0.0637	0.000248874	1.07e-05	0.00016575	8.59e-06	3.37098e-05	5.64e-06	-7.71677e-06	5.97e-06
STD	0.709203	0.999983	1.55e-05	1.72265e-05	1.02e-06	4.03103e-06	5.99e-07	8.92847	0.117	0.000154709	9.04e-06	3.24196e-05	5.3e-06	1.00551e-05	5.25e-06	-2.58763e-05	6.03e-06
MNP	0.706145	0.706157	1.47e-05	1.94357e-05	8.99e-07	2.20441e-05	6.9e-07	12.4729	0.0507	0.000239746	1.11e-05	0.000277362	8.91e-06	3.14611e-05	5.75e-06	2.21891e-06	6.43e-06
MNP	0.706146	0.706158	1.31e-05	2.12857e-05	7.44e-07	9.58169e-06	5.39e-07	11.7176	0.0547	0.000248884	8.63e-06	0.00011205	6.35e-06	2.15179e-05	5.18e-06	1.50715e-05	6.13e-06
MNP	0.706146	0.706158	1.41e-05	1.996e-05	8.33e-07	4.41722e-05	1.66e-06	12.7424	0.0667	0.000253832	1.05e-05	0.000557175	1.97e-05	3.1429e-05	5.62e-06	-2.01825e-06	6.67e-06
MNP	0.706151	0.706163	1.4e-05	1.99907e-05	8.21e-07	3.30672e-05	8e-07	12.6113	0.0576	0.000251933	9.92e-06	0.000410351	1.05e-05	1.26117e-05	5.65e-06	-1.20047e-05	6.2e-06
STD	0.709193	0.999972	1.53e-05	1.50464e-05	9.75e-07	2.51292e-06	5.36e-07	10.0886	0.037	0.000149805	9.92e-06	2.62531e-05	5.43e-06	1.78329e-05	5.72e-06	-6.8538e-06	5.43e-06
MNP	0.70616	0.706179	1.67e-05	2.04846e-05	8.71e-07	2.8428e-05	8.69e-07	11.9374	0.113	0.000236937	1.03e-05	0.000341386	8.88e-06	2.94869e-05	5.39e-06	-7.83e-07	5.91e-06
MNP	0.706172	0.706191	1.39e-05	2.04935e-05	8.59e-07	1.94415e-05	5.72e-07	12.0477	0.0511	0.000245008	1.02e-05	0.000233779	6.74e-06	2.6599e-05	5.49e-06	-1.53959e-06	6.17e-06
MNP	0.706184	0.706204	1.43e-05	2.00393e-05	7.76e-07	4.25934e-05	1.77e-06	12.1403	0.0597	0.00024289	9.42e-06	0.000518623	2.16e-05	4.01257e-05	5.91e-06	7.39343e-06	6.21e-06
MNP	0.706134	0.706154	1.47e-05	1.98201e-05	7.61e-07	7.13038e-06	5.74e-07	12.5564	0.0466	0.000249103	9.61e-06	8.93862e-05	7.14e-06	1.67975e-05	5.98e-06	-7.24107e-06	6.07e-06
STD	0.709188	0.999962	1.5e-05	1.7601e-05	9.66e-07	3.40996e-06	5.45e-07	10.0467	0.0361	0.000177223	9.81e-06	3.28376e-05	5.55e-06	-8.2702e-06	6.77e-06	-1.75448e-05	5.75e-06
MNP	0.70613	0.706156	1.44e-05	1.99895e-05	7.65e-07	8.04721e-06	4.39e-07	13.2797	0.0548	0.000264435	1.02e-05	0.000105807	5.82e-06	1.58401e-05	5.18e-06	-5.14453e-06	5.95e-06
MNP	0.706195	0.706222	1.41e-05	2.0436e-05	8.12e-07	1.5586e-05	8.15e-07	12.4436	0.0389	0.000255869	1.02e-05	0.000191377	9.82e-06	3.10513e-05	5.88e-06	4.10327e-06	5.83e-06
MNP	0.706139	0.706166	1.47e-05	2.40037e-05	9.1e-07	1.83744e-05	8.9e-07	11.379	0.05	0.000273673	1.04e-05	0.000207281	9.65e-06	2.12334e-05	5.92e-06	-3.79018e-08	6.08e-06
MNP	0.706131	0.706158	1.53e-05	2.07821e-05	8.56e-07	1.20818e-05	5.39e-07	11.9184	0.0433	0.000244854	1e-05	0.000143985	6.29e-06	1.60519e-05	5.47e-06	1.79908e-05	5.17e-06
STD	0.709179	0.999961	1.6e-05	1.56286e-05	9.05e-07	2.66704e-06	5.38e-07	10.222	0.0353	0.000161363	9.34e-06	2.68949e-05	5.51e-06	7.40253e-06	5.41e-06	-1.6555e-05	6e-06
MNP	0.706153	0.70618	1.46e-05	2.52493e-05	8.22e-07	6.9795e-06	5.53e-07	10.8164	0.0465	0.000274788	9.07e-06	7.61856e-05	6.03e-06	2.97831e-05	6.13e-06	8.1235e-06	6.35e-06
MNP	0.706134	0.706162	1.56e-05	2.15325e-05	9.23e-07	2.679e-05	1.21e-06	11.545	0.0492	0.000245543	1.05e-05	0.000305253	1.38e-05	1.88381e-05	5.84e-06	1.45631e-05	6.23e-06
MNP	0.706166	0.706194	1.45e-05	2.46686e-05	9.16e-07	1.55539e-05	6.65e-07	12.0235	0.059	0.000296812	1.11e-05	0.000184914	8.14e-06	1.66692e-05	5.71e-06	4.27904e-06	5.56e-06
MNP	0.706159	0.706186	1.36e-05	2.30521e-05	8.21e-07	2.28007e-05	1.19e-06	12.4665	0.0525	0.000287072	1.03e-05	0.000282206	1.5e-05	2.47456e-05	5.74e-06	1.60558e-05	6.43e-06
STD	0.709186	0.99995	1.52e-05	1.86214e-05	9.13e-07	5.08622e-06	5.77e-07	10.2708	0.0374	0.000189299	9.18e-06	5.11225e-05	5.85e-06	3.14465e-07	6.07e-06	-3.26588e-05	6.49e-06
MNP	0.706116	0.706152	1.45e-05	2.01684e-05	7.26e-07	8.81221e-06	5.7e-07	13.3742	0.066	0.000271162	9.86e-06	0.00011691	7.52e-06	2.87351e-05	6.04e-06	1.34967e-05	5.72e-06
MNP	0.706123	0.706159	1.59e-05	2.06878e-05	8.81e-07	4.54972e-06	4.42e-07	12.1618	0.0551	0.000248813	1.07e-05	5.76971e-05	5.44e-06	2.44001e-05	5.32e-06	1.75068e-05	5.41e-06
MNP	0.706152	0.706188	1.5e-05	2.14811e-05	7.83e-07	4.49066e-06	4.86e-07	11.8206	0.0581	0.000252788	9.12e-06	5.48683e-05	5.84e-06	3.16957e-05	5.99e-06	5.63095e-06	6.39e-06
MNP	0.706176	0.706212	1.48e-05	2.8166e-05	9.66e-07	7.55077e-06	5.89e-07	9.92592	0.0489	0.000282307	9.89e-06	7.39902e-05	5.8e-06	4.24823e-05	6.41e-06	3.77382e-05	6.05e-06
STD	0.709163	0.999947	1.49e-05	1.90995e-05	9.15e-07	6.36721e-06	5.37e-07	10.2973	0.038	0.000192548	9.17e-06	6.58334e-05	5.52e-06	2.13889e-06	5.58e-06	2.13094e-06	5.83e-06
MNP	0.706169	0.706206	1.47e-05	2.71264e-05	9.44e-07	1.08393e-05	6.58e-07	10.1885	0.0521	0.000274619	9.59e-06	0.000110282	6.77e-06	2.68288e-05	5.53e-06	1.46592e-05	6.04e-06
MNP	0.706124	0.706161	1.4e-05	2.3572e-05	9.55e-07	1.10104e-05	8.82e-07	10.3562	0.0446	0.000242638	9.79e-06	0.000116501	9.65e-06	1.15745e-05	5.83e-06	1.07791e-05	5.67e-06
MNP	0.706143	0.70618	1.55e-05	2.9049e-05	1.05e-06	6.47161e-06	5.35e-07	9.24288	0.0355	0.00026837	9.72e-06	5.96359e-05	4.92e-06	2.57889e-05	6.71e-06	1.45052e-05	6.85e-06
MNP	0.706178	0.706215	1.66e-05	2.75619e-05	9.03e-07	1.09584e-05	6.19e-07	9.68875	0.0405	0.000266013	8.69e-06	0.000105415	5.91e-06	1.78372e-05	4.96e-06	-1.20044e-05	5.5e-06
STD	0.709182	0.999986	1.39e-05	1.69234e-05	9.6e-07	2.02887e-06	6.66e-07	9.15118	0.0396	0.000154092	8.74e-06	2.11666e-05	6.08e-06	-3.18338e-07	5.18e-06	-2.08689e-06	5.12e-06
MNP	0.706211	0.706221	1.4e-05	2.38197e-05	9.67e-07	1.30207e-05	1.04e-06	10.9006	0.0504	0.000260683	1.1e-05	0.000141258	1.12e-05	1.65071e-05	5.94e-06	1.92406e-05	5.35e-06
MNP	0.706169	0.706179	1.45e-05	2.08677e-05	7.58e-07	3.81795e-06	4.87e-07	12.53	0.064	0.000261811	9.59e-06	4.85654e-05	5.98e-06	2.45652e-05	5.46e-06	1.4332e-08	5.77e-06
MNP	0.706155	0.706165	1.59e-05	2.84034e-05	8.52e-07	5.10779e-06	5.54e-07	9.7109	0.0499	0.000279579	8.64e-06	5.00208e-05	5.24e-06	3.77174e-05	5.71e-06	1.82251e-05	6.84e-06
MNP	0.706189	0.706198	1.62e-05	3.05585e-05	1.16e-06	6.28315e-06	6.06e-07	9.54288	0.0528	0.000288101	1.11e-05	6.11122e-05	5.83e-06	3.75895e-05	6e-06	1.70907e-05	6.04e-06
STD	0.709218	1.00001	1.46e-05	1.62818e-05	9.92e-07	5.83762e-06	6.29e-07	9.76998	0.0402	0.000156324	9.45e-06	5.62961e-05	6.2e-06	1.96989e-05	5.66e-06	-8.28155e-06	5.24e-06
MNP	0.706182	0.706175	1.4e-05	2.77399e-05	9.04e-07	6.95966e-06	5.1e-07	10.0388	0.0425	0.000282254	9.35e-06	6.87895e-05	5.07e-06	3.38745e-05	5.89e-06	2.77044e-05	7e-06
MNP	0.706184	0.706176	1.42e-05	2.42655e-05	9.39e-07	5.34765e-06	5.48e-07	10.0082	0.0328	0.000243432	9.49e-06	5.52984e-05	5.45e-06	4.08758e-05	5.62e-06	1.54462e-05	6.33e-06
MNP	0.706195	0.706187	1.54e-05	2.68727e-05	8.18e-07	5.92712e-06	5.55e-07	10.0481	0.0435	0.000272895	8.32e-06	6.02991e-05	5.59e-06	2.53541e-05	5.05e-06	4.5689e-06	6.37e-06
MNP	0.70618	0.706172	1.79e-05	2.74197e-05	1e-06	6.173e-06	5.54e-07	9.73638	0.0403	0.000268474	9.78e-06	5.91385e-05	5.38e-06	2.32954e-05	6.12e-06	1.82112e-05	6.35e-06
STD	0.709217	1	1.62e-05	1.86806e-05	8.62e-07	4.34302e-06	6.32e-07	9.88613	0.0377	0.000184551	8.54e-06	4.14174e-05	6.17e-06	3.63062e-06	5.27e-06	-2.31416e-05	6.32e-06
MNP	0.706146	0.706146	1.75e-05	2.48522e-05	9.48e-07	8.78552e-06	6.55e-07	10.2621	0.0509	0.000248454	9.29e-06	8.92546e-05	6.8e-06	1.57601e-05	5.19e-06	2.89733e-05	6.28e-06
MNP	0.706151	0.706151	1.44e-05	2.6921e-05	7.61e-07	4.44827e-06	6.41e-07	9.64138	0.0486	0.000260187	7.4e-06	4.4811e-05	6.16e-06	3.37883e-05	5.79e-06	3.72524e-05	5.74e-06
MNP	0.706191	0.706191	1.56e-05	2.74797e-05	9.5e-07	5.87483e-06	5.89e-07	10.2088	0.0468	0.000285901	9.94e-06	5.84672e-05	5.82e-06	2.63847e-05	5.64e-06	4.02424e-05	6.87e-06
MNP	0.706179	0.706179	1.59e-05	2.6318e-05	8.8e-07	5.53668e-06	5.2e-07	10.1182	0.0606	0.000260441	8.56e-06	5.41366e-05	5.23e-06	2.90251e-05	5.9e-06	2.17146e-05	5.94e-06
STD	0.709203	0.999998	1.6e-05	1.83569e-05	9.85e-07	5.40315e-06	6.56e-07	9.2232	0.0417	0.000168611	8.92e-06	4.769e-05	6.06e-06	-2.56697e-07	5.31e-06	-5.46395e-06	6.44e-06
MNP	0.706188	0.706189	1.77e-05	3.46128e-05	1.07e-06	7.60039e-06	7.28e-07	7.77673	0.0193	0.000268909	8.28e-06	5.90757e-05	5.66e-06	3.56773e-05	5.94e-06	3.54411e-05	6.23e-06
MNP	0.706204	0.706206	1.49e-05	2.74654e-05	9.9e-07	4.3578e-06	6.05e-07	9.7919	0.0609	0.000268056	9.76e-06	4.41334e-05	5.8e-06	2.31669e-05	5.97e-06	2.56143e-05	6.17e-06
MNP	0.706163	0.706164	1.6e-05	2.64117e-05	9.18e-07	5.0183e-06	6.31e-07	9.56435	0.0466	0.000254599	8.72e-06	4.79563e-05	5.85e-06	2.71102e-05	6.03e-06	2.86417e-05	6.93e-06
MNP	0.706162	0.706163	1.38e-05	2.15777e-05	8.27e-07	1.14376e-05	5.17e-07	11.4684	0.0424	0.000247191	9.27e-06	0.00013231	5.96e-06	1.08931e-05	5.49e-06	2.08279e-05	5.92e-06
STD	0.709215		1.79e-05	1.8102e-05	9.65e-07	2.70264e-06	6.85e-07	9.18389	0.0743	0.000169461	8.94e-06	2.52243e-05	5.96e-06	1.65555e-06	6.12e-06	-1.80124e-05	5.69e-06

## Sheet: MNP04
SampleName	87Sr/86Sr_	'87Sr/86Sr_Corr'	SE	'84Kr/88Sr'	SE	'85Rb/88Sr'	SE	'88 Intens'	SE	'Kr84 (V)'	SE	'Rb85 (V)'	SE	'167Er2'	SE	'173Yb2'	SE
STD	0.709196	0.999999	1.2e-05	1.60425e-05	7.18e-07	5.05915e-06	3.34e-07	15.9019	0.0663	0.000255274	1.13e-05	8.20047e-05	5.51e-06	6.4919e-06	5.54e-06	-1.83623e-05	5.32e-06
MNP	0.706136	0.706137	1.31e-05	2.42432e-05	5.57e-07	1.67279e-05	6.58e-07	18.3548	0.0629	0.00044599	1.05e-05	0.000307622	1.16e-05	4.62972e-05	6.04e-06	1.12678e-05	5.5e-06
MNP	0.706152	0.706152	1.14e-05	2.68952e-05	6.58e-07	1.53692e-05	4.74e-07	17.202	0.0824	0.000461831	1.14e-05	0.000265274	8.49e-06	5.82019e-05	5.8e-06	2.77651e-05	5.73e-06
MNP	0.706183	0.706184	1.18e-05	2.27395e-05	5.46e-07	1.25799e-05	3.65e-07	19.2265	0.0846	0.000437273	1.08e-05	0.000241254	6.48e-06	4.93564e-05	5.48e-06	1.54232e-05	5.35e-06
STD	0.709223	1.00004	1.22e-05	1.45194e-05	6.68e-07	3.93838e-06	3.33e-07	15.8242	0.0626	0.000229296	1.05e-05	6.13736e-05	5.36e-06	1.5824e-05	6.16e-06	-1.9492e-05	5.06e-06
MNP	0.706184	0.706159	1.31e-05	2.57933e-05	6.29e-07	1.70133e-05	5.92e-07	18.2591	0.0826	0.000470233	1.15e-05	0.000307838	1.06e-05	5.2529e-05	5.13e-06	3.08915e-05	6.51e-06
MNP	0.706193	0.706168	1.12e-05	1.79375e-05	4.81e-07	9.65299e-06	4.12e-07	23.2585	0.115	0.000417747	1.14e-05	0.000223385	9.95e-06	4.8067e-05	5.41e-06	5.65172e-06	5.79e-06
MNP	0.706177	0.706152	1.15e-05	1.73513e-05	4.37e-07	6.21066e-06	3.33e-07	23.7555	0.12	0.000408343	1.05e-05	0.000149174	8.18e-06	4.45511e-05	5.82e-06	2.20041e-05	5.24e-06
STD	0.709248		1.21e-05	1.56566e-05	7.67e-07	2.26489e-06	3.83e-07	15.9894	0.0612	0.000250105	1.22e-05	3.34702e-05	6.05e-06	7.836e-06	5.78e-06	-2.90201e-05	6.36e-06
std	0.709198	0.999992	1.27e-05	2.09474e-05	6.59e-07	5.43484e-06	4.12e-07	13.9342	0.0569	0.000290886	9.06e-06	7.67349e-05	5.75e-06	3.79208e-05	5.55e-06	-7.22373e-05	5.55e-06
MNP	0.706176	0.706181	1.33e-05	2.8383e-05	6.67e-07	2.74159e-05	1.41e-06	16.1232	0.0943	0.000453744	1.09e-05	0.000437593	2.18e-05	8.08607e-05	5.9e-06	-6.19748e-05	7.51e-06
MNP	0.706181	0.706187	1.33e-05	2.85731e-05	1.12e-06	3.25289e-05	8.19e-07	16.1096	0.0927	0.000448082	1.83e-05	0.000516017	1.18e-05	8.12999e-05	5.81e-06	-7.13665e-05	7.29e-06
MNP	0.706175	0.706181	1.3e-05	3.00611e-05	6.28e-07	5.41038e-05	2.5e-06	15.9863	0.0808	0.00047912	1.02e-05	0.000864023	4.14e-05	8.19677e-05	5.61e-06	-7.09622e-05	7.21e-06
MNP	0.706194	0.7062	1.21e-05	3.37965e-05	7.58e-07	3.95988e-05	9.54e-07	15.525	0.0978	0.000523873	1.19e-05	0.000622664	1.61e-05	7.78655e-05	6.26e-06	-5.15599e-05	7.92e-06
std	0.70921	1.00001	1.41e-05	2.19852e-05	7.13e-07	4.30954e-06	4.45e-07	13.8233	0.0568	0.000301929	9.68e-06	5.95623e-05	6.15e-06	5.22985e-05	5.2e-06	-6.76417e-05	5.42e-06
MNP	0.706199	0.706189	1.35e-05	3.53522e-05	6.05e-07	1.71642e-05	4.96e-07	15.9272	0.095	0.000562964	1.01e-05	0.000269494	7.94e-06	9.17281e-05	5.87e-06	-3.07973e-05	8.18e-06
MNP	0.706167	0.706157	1.26e-05	3.35351e-05	5.88e-07	4.34259e-05	1.18e-06	15.4269	0.0527	0.00052083	9.16e-06	0.000659154	1.67e-05	8.19011e-05	5.33e-06	-4.11247e-05	7.47e-06
MNP	0.70618	0.70617	1.34e-05	3.14858e-05	5.91e-07	1.03794e-05	5.07e-07	14.1086	0.069	0.000444614	8.75e-06	0.000148471	6.78e-06	7.3842e-05	5.62e-06	-5.01203e-05	7.47e-06
MNP	0.706198	0.706188	1.37e-05	3.54762e-05	6.75e-07	1.18305e-05	4.62e-07	13.3495	0.074	0.000478964	9.28e-06	0.000161627	6.08e-06	8.81987e-05	5.56e-06	-4.54557e-05	6.87e-06
std	0.70923	0.999982	1.67e-05	2.52806e-05	8.64e-07	6.6214e-06	5.66e-07	10.7477	0.138	0.000272617	9.76e-06	7.21057e-05	6.1e-06	4.23644e-05	5.8e-06	-5.42738e-05	4.98e-06
MNP	0.706166	0.706178	1.36e-05	4.18252e-05	6.99e-07	1.34288e-05	4e-07	13.344	0.0651	0.000557205	9.63e-06	0.000179066	5.33e-06	8.43353e-05	5.46e-06	-4.48931e-05	8.11e-06
MNP	0.706153	0.706166	1.46e-05	3.7286e-05	8.06e-07	1.15856e-05	4.06e-07	13.3583	0.0601	0.000501155	1.09e-05	0.000153917	5.28e-06	8.92974e-05	5.5e-06	-5.14623e-05	7.56e-06
MNP	0.706155	0.706168	1.29e-05	3.63839e-05	6.33e-07	1.04244e-05	4.25e-07	13.2445	0.0794	0.00048113	8.92e-06	0.000139275	5.76e-06	7.49103e-05	5.94e-06	-3.24067e-05	7.31e-06
MNP	0.706149	0.706161	1.26e-05	2.9983e-05	6.37e-07	7.70339e-06	3.62e-07	14.8379	0.0803	0.000449444	9.81e-06	0.00011406	5.46e-06	6.30046e-05	5.87e-06	-7.37154e-05	7.17e-06
std	0.709165	0.999943	1.38e-05	2.09461e-05	7.79e-07	7.10095e-06	4.05e-07	12.6183	0.0671	0.000266361	9.92e-06	9.20409e-05	5.16e-06	2.88842e-05	5.13e-06	-6.49175e-05	5.38e-06
MNP	0.706167	0.706207	1.37e-05	4.63762e-05	1.06e-06	1.13549e-05	5.6e-07	9.63539	0.0509	0.000450991	1e-05	0.000110506	5.42e-06	6.55472e-05	5.37e-06	-4.61838e-05	8.22e-06
MNP	0.706179	0.706219	1.37e-05	3.17396e-05	6.8e-07	9.09377e-06	4e-07	13.6633	0.0608	0.000433824	9.42e-06	0.000124534	5.48e-06	7.35379e-05	5.89e-06	-6.68232e-05	6.55e-06
MNP	0.706193	0.706233	1.4e-05	4.27287e-05	7.81e-07	1.27262e-05	4.2e-07	12.5379	0.0691	0.000534043	9.79e-06	0.000159459	5.52e-06	7.53276e-05	5.76e-06	-5.26013e-05	7.1e-06
MNP	0.706164	0.706205	1.55e-05	3.31348e-05	7.43e-07	8.28859e-06	4.12e-07	13.5885	0.0713	0.000448098	1.02e-05	0.000112587	5.54e-06	7.52824e-05	5.56e-06	-5.56324e-05	7.28e-06
std	0.709175	0.999961	1.46e-05	2.17095e-05	6.92e-07	7.261e-06	3.69e-07	14.0564	0.0552	0.000305895	9.69e-06	0.000102083	5.2e-06	4.68453e-05	5.17e-06	-4.78027e-05	5.2e-06
MNP	0.70619	0.706217	1.27e-05	3.3565e-05	6.99e-07	8.78429e-06	4.31e-07	13.8104	0.0702	0.00046658	9.57e-06	0.000121594	6.03e-06	6.48363e-05	5.18e-06	-5.7878e-05	6.37e-06
MNP	0.706147	0.706175	1.3e-05	2.76218e-05	6.15e-07	6.72935e-06	3.56e-07	15.9396	0.0779	0.000447942	9.92e-06	0.000106206	5.71e-06	8.35727e-05	6.53e-06	-4.48492e-05	7.15e-06
MNP	0.706147	0.706175	1.37e-05	3.42645e-05	7.13e-07	1.11085e-05	5.41e-07	13.6516	0.0616	0.000471085	9.79e-06	0.00015072	7.24e-06	8.20511e-05	5.71e-06	-4.47605e-05	7.22e-06
MNP	0.706134	0.706162	1.26e-05	2.68814e-05	6.64e-07	6.59325e-06	3.12e-07	16.3678	0.0798	0.000442981	1.11e-05	0.000107884	5.22e-06	6.92696e-05	6.3e-06	-4.18165e-05	7.94e-06
std	0.70919	0.999963	1.4e-05	2.24604e-05	7.35e-07	9.41146e-06	4.25e-07	13.4488	0.0697	0.000300438	9.82e-06	0.00012626	5.74e-06	3.37282e-05	5.82e-06	-7.45087e-05	5.17e-06
MNP	0.706151	0.706178	1.35e-05	3.04174e-05	6.04e-07	1.74505e-05	4e-07	15.4324	0.0764	0.000471345	9.35e-06	0.000268422	6.13e-06	7.16685e-05	5.59e-06	-6.86555e-05	7.26e-06
MNP	0.706157	0.706183	1.42e-05	3.28978e-05	6.73e-07	9.4145e-06	3.9e-07	14.2274	0.0626	0.000461583	9.75e-06	0.000134708	5.47e-06	6.04955e-05	5.69e-06	-5.59075e-05	6.4e-06
MNP	0.706188	0.706215	1.38e-05	3.03809e-05	7.11e-07	1.64327e-05	5.31e-07	14.8223	0.0744	0.000448616	1.1e-05	0.00024236	7.9e-06	7.26195e-05	5.4e-06	-6.37338e-05	6.55e-06
MNP	0.706163	0.70619	1.44e-05	3.05249e-05	7.57e-07	1.41485e-05	4.09e-07	14.9132	0.0781	0.00045596	1.14e-05	0.000212209	5.82e-06	7.43809e-05	5.42e-06	-6.7487e-05	7.72e-06
std	0.709177	0.999966	1.45e-05	2.19638e-05	7.57e-07	5.94664e-06	4.32e-07	13.8059	0.0707	0.000304332	1.04e-05	7.97253e-05	5.86e-06	4.03391e-05	6.36e-06	-4.08292e-05	6.03e-06
MNP	0.706217	0.706241	1.92e-05	2.80732e-05	8.91e-07	1.14051e-05	6.6e-07	19.7731	0.592	0.000494597	1.56e-05	0.000191085	8.31e-06	7.28983e-05	5.87e-06	-6.30889e-05	7.62e-06
MNP	0.706176	0.7062	1.28e-05	3.05557e-05	6.39e-07	1.57735e-05	4.91e-07	14.6982	0.0579	0.000445246	9.86e-06	0.000230666	7.23e-06	6.71191e-05	5.95e-06	-4.78057e-05	6.75e-06
MNP	0.706179	0.706203	1.31e-05	2.80651e-05	6.04e-07	9.9038e-06	3.71e-07	16.2183	0.0798	0.000453175	9.38e-06	0.000158627	6.28e-06	7.53289e-05	5.44e-06	-4.83233e-05	7.21e-06
MNP	0.7062	0.706223	1.23e-05	3.12852e-05	6.52e-07	1.26233e-05	4.84e-07	14.2944	0.0719	0.000446622	9.39e-06	0.000180335	7.17e-06	7.53417e-05	5.39e-06	-5.87594e-05	6.36e-06
std	0.709195	1.00001	1.46e-05	2.17393e-05	7.53e-07	4.08117e-06	4.89e-07	12.9431	0.0891	0.000285873	9.82e-06	5.19801e-05	6.41e-06	3.63476e-05	6.46e-06	-5.52588e-05	5.02e-06
MNP	0.706168	0.706163	1.31e-05	2.7733e-05	7.36e-07	2.10492e-05	6.09e-07	14.9609	0.0768	0.000412766	1.14e-05	0.000313382	8.98e-06	6.99386e-05	6.05e-06	-5.23524e-05	6.55e-06
MNP	0.706152	0.706147	1.22e-05	3.00681e-05	6.73e-07	6.18178e-06	3.76e-07	14.9071	0.0711	0.000447243	1.04e-05	9.1777e-05	5.6e-06	5.85296e-05	5.56e-06	-5.06543e-05	6.24e-06
MNP	0.706145	0.706141	1.3e-05	3.19689e-05	6.4e-07	1.07934e-05	4.42e-07	14.421	0.0716	0.000463578	9.34e-06	0.000152987	6.53e-06	7.05635e-05	6.09e-06	-5.15181e-05	6.64e-06
MNP	0.706173	0.706168	1.46e-05	3.281e-05	6.52e-07	8.21579e-06	4.5e-07	13.4859	0.0733	0.000439529	8.84e-06	0.000111744	6.1e-06	7.16748e-05	5.29e-06	-3.07261e-05	7.98e-06
std	0.709235	1.00006	1.48e-05	2.37039e-05	6.85e-07	4.85345e-06	3.58e-07	14.0811	0.0624	0.000335918	9.9e-06	6.88883e-05	5.17e-06	5.22118e-05	5.64e-06	-1.69554e-05	6.24e-06
MNP	0.706205	0.70616	1.25e-05	3.19067e-05	6.77e-07	1.32881e-05	5.19e-07	14.0876	0.0781	0.000450289	9.57e-06	0.000187335	7.12e-06	7.36116e-05	5.84e-06	-3.68379e-05	7.06e-06
MNP	0.706193	0.706148	1.53e-05	3.02332e-05	6.97e-07	1.07378e-05	4.54e-07	14.1868	0.0838	0.00043144	1.04e-05	0.000151446	6.66e-06	7.88233e-05	5.07e-06	-3.3161e-05	7.27e-06
MNP	0.706179	0.706135	1.38e-05	3.23321e-05	7.17e-07	1.30873e-05	6.46e-07	14.4154	0.0804	0.000464352	1.08e-05	0.000190663	8.97e-06	5.67565e-05	6.16e-06	-2.53091e-05	6.12e-06
MNP	0.706181	0.706136	1.46e-05	1.85723e-05	6.93e-07	2.53787e-06	3.52e-07	16.0434	0.0948	0.000297609	1.12e-05	3.96454e-05	5.66e-06	-8.97277e-05	5.69e-06	0.000127218	6.82e-06
std	0.709275	1.00006	1.37e-05	1.14502e-05	8.1e-07	-5.3042e-07	3.61e-07	13.6381	0.0568	0.000153735	1.08e-05	-6.09247e-06	4.84e-06	-0.00011546	6.43e-06	8.73282e-05	5.65e-06
MNP	0.706222	0.706179	1.29e-05	2.54086e-05	6.71e-07	7.29493e-06	3.87e-07	15.1886	0.0796	0.000385407	1.04e-05	0.000111436	5.75e-06	-3.62692e-05	5.29e-06	9.9124e-05	6.35e-06
MNP	0.706203	0.70616	1.6e-05	2.18024e-05	7.65e-07	3.95036e-06	3.84e-07	14.6211	0.0661	0.000322473	1.16e-05	5.59595e-05	5.61e-06	-4.7799e-05	6.17e-06	9.13737e-05	8.7e-06
MNP	0.706231	0.706188	1.43e-05	2.52693e-05	7.84e-07	1.17943e-05	6.93e-07	14.081	0.058	0.000356631	1.11e-05	0.000162918	9.25e-06	-4.30015e-05	5.43e-06	8.27843e-05	6.48e-06
MNP	0.706179	0.706135	1.28e-05	1.79942e-05	6.67e-07	5.11047e-06	5.59e-07	16.4769	0.0775	0.00029862	1.12e-05	8.45265e-05	9.09e-06	-5.46341e-05	5.43e-06	0.000108194	7.49e-06
std	0.709232	1.00003	1.24e-05	1.39141e-05	7.94e-07	4.10815e-06	4.04e-07	13.5333	0.0451	0.000188235	1.08e-05	5.46232e-05	5.37e-06	-6.69835e-05	6.17e-06	8.81518e-05	5.66e-06
MNP	0.706169	0.706144	1.53e-05	2.22332e-05	7.18e-07	5.30955e-06	3.97e-07	14.6161	0.0639	0.000324339	1.05e-05	7.83327e-05	5.87e-06	-2.88669e-05	5.74e-06	6.95552e-05	7.66e-06
MNP	0.706203	0.706178	1.27e-05	2.45162e-05	6.85e-07	4.56063e-06	3.91e-07	14.7778	0.0661	0.000361948	1.01e-05	6.65083e-05	5.76e-06	-2.30503e-05	5.7e-06	7.43366e-05	7.18e-06
MNP	0.706233	0.706208	1.41e-05	3.26189e-05	7.7e-07	5.77744e-06	4.82e-07	11.2703	0.0683	0.000370665	8.93e-06	6.38713e-05	5.32e-06	-1.18817e-05	5.98e-06	0.000104757	8.01e-06
MNP	0.706219	0.706195	1.43e-05	3.30609e-05	7.76e-07	8.1443e-06	4.37e-07	12.3619	0.0406	0.000406137	9.39e-06	9.97081e-05	5.36e-06	1.46727e-05	5.61e-06	9.0388e-05	7.05e-06
std	0.709237	1.00003	1.55e-05	1.61609e-05	6.22e-07	4.39347e-06	4.43e-07	14.0869	0.0647	0.000225691	8.66e-06	6.20728e-05	6.25e-06	-4.17559e-05	5.73e-06	8.20124e-05	5.18e-06
MNP	0.706183	0.706159	1.54e-05	2.84929e-05	6.7e-07	2.87571e-05	6.68e-07	15.4978	0.0623	0.000443754	1.06e-05	0.000447832	9.8e-06	5.03254e-06	5e-06	9.41601e-05	6.38e-06
MNP	0.706216	0.706191	1.36e-05	2.68343e-05	5.86e-07	4.12535e-05	1.21e-06	16.4191	0.0838	0.000442129	9.74e-06	0.000681054	2.09e-05	1.86152e-06	5.68e-06	8.96515e-05	6.5e-06
MNP	0.706205	0.70618	1.37e-05	2.6127e-05	6.44e-07	2.76109e-05	8.95e-07	17.7569	0.082	0.000459743	1.15e-05	0.000483573	1.51e-05	1.93252e-05	5.74e-06	5.97618e-05	6.36e-06
MNP	0.706183	0.706159	1.33e-05	3.0734e-05	7.32e-07	5.91569e-06	4.12e-07	13.3263	0.0643	0.000401924	9.62e-06	7.87025e-05	5.46e-06	-3.36932e-06	6.32e-06	5.05026e-05	7.32e-06
std	0.709232	1.00004	1.41e-05	1.88562e-05	6.8e-07	2.77593e-06	3.9e-07	13.4827	0.0704	0.000258158	9.46e-06	3.75056e-05	5.19e-06	-2.03889e-05	5.79e-06	4.83535e-05	5.76e-06
MNP	0.706218	0.706192	1.52e-05	3.37332e-05	8.22e-07	8.18152e-06	4.15e-07	14.0624	0.0678	0.000476919	1.18e-05	0.000115601	5.9e-06	1.22963e-05	6.02e-06	8.24174e-05	5.96e-06
MNP	0.706204	0.706177	1.37e-05	2.76859e-05	7.69e-07	6.81278e-06	4.8e-07	13.2722	0.0489	0.00036563	1e-05	9.03882e-05	6.4e-06	-2.61688e-05	6.54e-06	9.63407e-05	8.42e-06
MNP	0.706203	0.706177	1.36e-05	2.93999e-05	8e-07	7.46034e-06	4.71e-07	12.3791	0.0495	0.000359799	9.8e-06	9.22932e-05	5.96e-06	-2.80447e-05	5.73e-06	6.95374e-05	7.03e-06
MNP	0.706228	0.706201	1.2e-05	2.69535e-05	6.73e-07	5.39689e-06	4.44e-07	13.5172	0.0317	0.000364238	9.47e-06	7.33028e-05	6.01e-06	-1.60294e-05	5.51e-06	0.000105208	6.85e-06
std	0.709242	1.00002	1.43e-05	1.43679e-05	7.35e-07	1.07236e-06	4.53e-07	13.0275	0.0788	0.000187827	9.53e-06	1.44751e-05	5.93e-06	-6.63022e-05	6.5e-06	9.62637e-05	5.44e-06
MNP	0.70621	0.706197	1.34e-05	2.4094e-05	6.98e-07	5.1772e-06	4.07e-07	15.3369	0.0613	0.000367635	1.08e-05	8.01747e-05	6.16e-06	-1.85417e-05	5.77e-06	8.34662e-05	6.67e-06
MNP	0.706237	0.706225	1.34e-05	2.27163e-05	7.62e-07	3.1014e-06	5.1e-07	14.74	0.0688	0.000333759	1.14e-05	4.57125e-05	7.5e-06	-6.32992e-05	6.87e-06	0.000112402	7.02e-06
MNP	0.706231	0.706219	1.36e-05	2.26545e-05	5.88e-07	4.60007e-06	3.56e-07	15.951	0.0807	0.000357085	9.41e-06	7.50139e-05	5.76e-06	-3.9527e-05	6.13e-06	0.000128755	7.85e-06
MNP	0.706195	0.706183	1.25e-05	2.24441e-05	7.03e-07	5.2711e-06	4.47e-07	16.0669	0.08	0.000357235	1.11e-05	8.39856e-05	7.33e-06	-2.89945e-05	5.38e-06	9.28434e-05	8.07e-06
std	0.709204	1	1.3e-05	2.77068e-05	8.84e-07	1.04708e-05	4.84e-07	13.2102	0.0629	0.000359907	1.09e-05	0.000137819	6.12e-06	6.82837e-05	7.58e-06	4.302e-06	6.55e-06
MNP	0.706178	0.706176	1.37e-05	3.65336e-05	6.42e-07	2.61521e-05	6.09e-07	15.3082	0.0941	0.000555195	9.92e-06	0.000394233	8.07e-06	0.000153371	6.4e-06	-1.19185e-05	6.6e-06
MNP	0.706216	0.706214	1.28e-05	3.6666e-05	5.76e-07	2.2922e-05	5.03e-07	15.6518	0.0777	0.000582831	9.89e-06	0.000362375	8.08e-06	0.000132636	6.31e-06	-3.40284e-05	6.84e-06
MNP	0.706166	0.706164	1.45e-05	3.92781e-05	6.35e-07	2.43592e-05	4.89e-07	15.3142	0.0811	0.000597725	9.97e-06	0.000374798	8.38e-06	0.000150415	6.02e-06	-5.38151e-07	6.62e-06
MNP	0.706164	0.706163	1.37e-05	3.7338e-05	6.77e-07	2.2417e-05	7.09e-07	15.7734	0.0851	0.00058644	1.11e-05	0.000377695	1.43e-05	0.000163966	5.65e-06	-2.08451e-05	7.53e-06
std	0.70922		1.46e-05	2.8036e-05	7.47e-07	1.06219e-05	4.74e-07	13.7566	0.0473	0.000384357	1.03e-05	0.000146162	6.56e-06	0.000101844	5.88e-06	-2.44435e-05	5.28e-06
STD	0.709225	1.00001	1.48e-05	1.56783e-05	8.66e-07	1.20549e-05	4.69e-07	14.2788	0.0698	0.000219522	1.23e-05	0.000172212	6.77e-06	9.3814e-06	6.26e-06	-3.4114e-05	5.52e-06
MNP	0.706167	0.706161	1.11e-05	1.9801e-05	5.2e-07	1.6045e-05	7.28e-07	22.0392	0.0938	0.00043732	1.17e-05	0.000359169	1.63e-05	2.32204e-05	5.7e-06	4.49821e-06	5.01e-06
MNP	0.706159	0.706153	1.19e-05	2.26347e-05	5.49e-07	1.70157e-05	4.99e-07	20.1467	0.0581	0.000456775	1.15e-05	0.000344424	1.07e-05	3.60887e-05	5.77e-06	2.34142e-05	6.05e-06
MNP	0.706136	0.70613	1.03e-05	1.69008e-05	5.89e-07	1.42756e-05	7.1e-07	23.8711	0.0965	0.000403563	1.45e-05	0.000336278	1.63e-05	2.76111e-05	5.55e-06	3.94512e-06	5.39e-06
MNP	0.706176	0.70617	1.08e-05	1.95833e-05	4.7e-07	3.88753e-05	1.53e-06	21.4429	0.107	0.000423588	1.04e-05	0.000819496	3.27e-05	3.65435e-05	5.39e-06	1.71124e-05	5.05e-06
STD	0.709207	0.999985	1.5e-05	1.59778e-05	6.95e-07	1.18736e-05	5.13e-07	13.6715	0.0563	0.000218277	9.67e-06	0.000165744	7.37e-06	-1.4601e-06	6.2e-06	-2.12251e-05	5.48e-06
MNP	0.706124	0.706135	1.1e-05	2.07737e-05	5.03e-07	1.37023e-05	4.62e-07	19.5599	0.1	0.000400497	9.63e-06	0.000266221	8.53e-06	3.69762e-05	5.38e-06	3.72405e-05	5.53e-06
MNP	0.70612	0.706131	1.2e-05	1.5573e-05	4.68e-07	5.55954e-06	3.06e-07	21.0963	0.0566	0.000330143	1e-05	0.000117623	6.44e-06	2.46938e-05	5.47e-06	1.88822e-05	5.06e-06
MNP	0.706153	0.706164	1.23e-05	2.34094e-05	6.54e-07	7.36416e-06	3.18e-07	18.2033	0.0795	0.000425695	1.19e-05	0.000133865	5.74e-06	3.2041e-05	6.73e-06	4.70421e-05	5.92e-06
MNP	0.706163	0.706174	1.25e-05	2.88611e-05	6.92e-07	8.76124e-06	4.09e-07	14.2647	0.0683	0.000408083	1e-05	0.000122578	5.71e-06	4.37406e-05	5.99e-06	3.48154e-05	5.37e-06
STD	0.709191	0.999989	1.36e-05	1.29407e-05	6.82e-07	6.54508e-06	4.09e-07	13.796	0.0515	0.000178218	9.48e-06	9.01822e-05	5.64e-06	1.1603e-05	5.51e-06	1.23128e-05	5e-06
MNP	0.706167	0.706175	1.06e-05	2.49126e-05	6.6e-07	7.98946e-06	3.72e-07	16.1479	0.0622	0.000404311	1.1e-05	0.000129043	6.04e-06	5.25643e-05	5.68e-06	4.7471e-05	5.82e-06
MNP	0.706186	0.706194	1.26e-05	2.48421e-05	6.27e-07	7.46873e-06	3.39e-07	16.898	0.0638	0.000414926	1.07e-05	0.000125837	5.8e-06	4.26179e-05	5.51e-06	5.37439e-05	5.27e-06
MNP	0.706166	0.706174	1.14e-05	2.08008e-05	5.94e-07	8.03016e-06	3e-07	19.5095	0.0911	0.000402377	1.15e-05	0.000156281	5.9e-06	4.54308e-05	5.53e-06	4.54733e-05	5.76e-06
MNP	0.706134	0.706142	1.22e-05	2.0002e-05	5.59e-07	5.74079e-06	3.05e-07	19.7712	0.0779	0.000392629	1.07e-05	0.000111896	5.95e-06	3.59707e-05	5.95e-06	4.37741e-05	5.97e-06
STD	0.709213	0.999997	1.33e-05	1.38355e-05	7.77e-07	5.84318e-06	3.96e-07	13.6579	0.0547	0.000190802	1.05e-05	8.15149e-05	5.53e-06	-1.54922e-05	6.09e-06	9.6381e-06	5.15e-06
MNP	0.706164	0.706166	1.26e-05	2.98001e-05	7.29e-07	2.20743e-05	8.57e-07	14.2084	0.0791	0.000421034	1.04e-05	0.000313937	1.28e-05	4.62457e-05	5.11e-06	5.70505e-05	4.72e-06
STD	0.709203	1.00002	1.36e-05	1.5485e-05	7.71e-07	6.02268e-06	4.21e-07	13.089	0.0319	0.000202026	1.01e-05	7.87285e-05	5.47e-06	3.22231e-05	5.88e-06	9.71449e-06	5.78e-06
MNP	0.709208	0.709192	1.18e-05	1.85689e-05	7.15e-07	8.00836e-06	4.11e-07	14.0044	0.0527	0.000262209	1.03e-05	0.000113321	5.72e-06	1.04774e-05	5.81e-06	1.72382e-05	5.18e-06
MNP	0.706175	0.706159	1.7e-05	3.25594e-05	9.71e-07	1.30659e-05	5.26e-07	10.9306	0.0507	0.00035376	1.06e-05	0.000142274	5.66e-06	4.47879e-05	5.02e-06	4.73457e-05	5.86e-06
MNP	0.706185	0.706169	1.2e-05	1.87719e-05	5.83e-07	2.04597e-05	5.99e-07	19.9285	0.114	0.000376164	1.17e-05	0.000404175	1.07e-05	4.84922e-05	5.73e-06	4.12927e-05	6.07e-06
MNP	0.706161	0.706145	1.32e-05	2.13733e-05	6.19e-07	1.70378e-05	9e-07	18.1699	0.114	0.000385549	1.11e-05	0.000300014	1.51e-05	3.14221e-05	5.22e-06	3.72533e-05	5.57e-06
MNP	0.706143	0.706127	1.35e-05	2.29511e-05	6.19e-07	6.84307e-06	3.19e-07	15.9561	0.0738	0.000364126	9.73e-06	0.000109523	5.15e-06	4.39463e-05	5.92e-06	3.8692e-05	4.76e-06
STD	0.70925	1.00005	1.28e-05	1.75159e-05	7.22e-07	6.4622e-06	3.96e-07	13.9189	0.0408	0.000243536	1e-05	9.05867e-05	5.43e-06	7.97357e-06	5.85e-06	9.3718e-08	5.47e-06
MNP	0.706186	0.706153	1.31e-05	1.88404e-05	5.5e-07	1.11306e-05	3.78e-07	20.3915	0.0698	0.00038608	1.13e-05	0.000223088	7.34e-06	3.67148e-05	5.59e-06	3.76361e-05	5.33e-06
MNP	0.706174	0.706141	1.34e-05	1.71248e-05	5.52e-07	6.11235e-05	1.96e-06	20.4653	0.0609	0.000340317	1.11e-05	0.00125106	4.14e-05	2.59098e-05	5.51e-06	3.137e-05	5.59e-06
MNP	0.706198	0.706165	1.33e-05	1.69501e-05	5.49e-07	5.71853e-05	2.68e-06	20.6259	0.125	0.000347095	1.13e-05	0.0011887	5.06e-05	2.74535e-05	5.93e-06	2.69026e-05	4.36e-06
MNP	0.706198	0.706165	1.39e-05	1.96989e-05	6.05e-07	6.70151e-05	1.39e-06	18.4724	0.13	0.000361013	1.11e-05	0.00121302	2.41e-05	4.13258e-05	5.5e-06	2.08073e-05	5.07e-06
STD	0.709236	1.00002	1.53e-05	1.83462e-05	7.55e-07	4.96943e-06	4.63e-07	13.2783	0.0735	0.000242664	1.01e-05	6.5898e-05	6.14e-06	2.17148e-05	6.01e-06	-7.68521e-07	6.3e-06
MNP	0.706143	0.706132	1.9e-05	1.72031e-05	6e-07	1.42753e-05	4.48e-07	20.0951	0.0726	0.000347749	1.22e-05	0.000285812	8.67e-06	1.73003e-05	5.75e-06	3.27771e-05	5.78e-06
MNP	0.706169	0.706159	1.53e-05	2.44107e-05	7.59e-07	2.03921e-05	7.11e-07	13.7435	0.0795	0.000338165	1.04e-05	0.000277738	1.01e-05	3.0909e-05	5.77e-06	1.92805e-05	5.56e-06
MNP	0.706183	0.706172	1.58e-05	1.7377e-05	6.3e-07	1.58736e-05	7.14e-07	20.353	0.108	0.000351938	1.27e-05	0.000326756	1.56e-05	2.18022e-05	6.3e-06	2.33654e-05	5.16e-06
MNP	0.70617	0.706159	1.65e-05	1.76583e-05	5.82e-07	5.78493e-05	1.98e-06	20.6469	0.202	0.000355494	1.09e-05	0.00119219	3.84e-05	3.37572e-05	6.49e-06	1.71984e-05	5.43e-06
STD	0.709206	1.00001	1.46e-05	1.6214e-05	7.34e-07	9.74478e-06	3.95e-07	13.8864	0.0443	0.000226617	1.03e-05	0.000135588	5.52e-06	1.39726e-05	6.16e-06	7.90657e-06	5.68e-06
MNP	0.706199	0.706191	1.47e-05	3.42455e-05	8.6e-07	8.30179e-05	3e-06	11.1991	0.0808	0.000378864	9.79e-06	0.000907284	2.83e-05	4.17493e-05	5.78e-06	2.1069e-05	5.62e-06
MNP	0.706173	0.706165	1.75e-05	3.57833e-05	1.06e-06	2.62221e-05	9.23e-07	9.5345	0.0157	0.000339587	1.02e-05	0.000248517	8.74e-06	3.37899e-05	6.83e-06	2.98965e-05	5.75e-06
MNP	0.706187	0.706179	1.7e-05	3.37908e-05	1.05e-06	6.448e-05	2.11e-06	9.94174	0.0224	0.000339655	1.06e-05	0.000647422	2.02e-05	4.05527e-05	6.58e-06	2.64394e-05	6.14e-06
MNP	0.70618	0.706172	1.43e-05	2.27356e-05	5.57e-07	1.90233e-05	5.68e-07	15.7298	0.0655	0.000359376	8.9e-06	0.000299322	9.32e-06	2.6324e-05	6.1e-06	2.39568e-05	5.7e-06
STD	0.70923	1.00001	2.54e-05	2.13721e-05	1.65e-06	2.90619e-06	1.06e-06	6.65548	0.12	0.000156252	1.17e-05	2.61297e-05	7.55e-06	3.10744e-06	7.8e-06	-7.34934e-06	6.4e-06
MNP	0.7062	0.706191	1.9e-05	2.12363e-05	7.15e-07	1.70382e-05	4.71e-07	17.4218	0.144	0.000372191	1.26e-05	0.000299964	8.38e-06	3.0907e-05	5.68e-06	1.73374e-05	5.2e-06
MNP	0.706143	0.706134	1.45e-05	2.10955e-05	7.22e-07	2.11936e-05	9.69e-07	17.019	0.0548	0.000360296	1.25e-05	0.000357053	1.56e-05	3.06882e-05	6.37e-06	1.14085e-05	5.5e-06
MNP	0.706157	0.706148	1.53e-05	2.69421e-05	7.77e-07	4.46416e-05	1.44e-06	13.9861	0.0218	0.000376961	1.1e-05	0.000624589	2.04e-05	3.69868e-05	5.9e-06	2.95725e-05	5.37e-06
MNP	0.706211	0.706203	1.7e-05	3.36598e-05	1.05e-06	8.47598e-05	2.58e-06	10.3765	0.121	0.000342759	1.07e-05	0.000861901	2.57e-05	3.3338e-05	5.76e-06	2.00251e-05	5.13e-06
STD	0.709207	0.999997	1.33e-05	1.68128e-05	6.4e-07	6.15036e-06	4.69e-07	13.5086	0.0501	0.000228175	8.47e-06	8.35426e-05	6.3e-06	-1.34044e-05	6.22e-06	-7.76982e-06	5.32e-06
MNP	0.70614	0.706142	1.21e-05	1.90363e-05	5.96e-07	4.29156e-05	7.09e-07	17.6518	0.0955	0.000337865	1.07e-05	0.000768444	1.46e-05	1.39242e-05	6.37e-06	2.66301e-05	6.06e-06
MNP	0.706209	0.706211	2.53e-05	3.02727e-05	1.12e-06	2.88178e-05	7.91e-07	12.3526	0.222	0.000362902	1.19e-05	0.000352732	1.06e-05	2.93438e-05	5.45e-06	1.52191e-05	5.3e-06
MNP	0.706161	0.706163	1.41e-05	2.15142e-05	5.3e-07	9.4635e-06	4.47e-07	17.5812	0.0986	0.000382897	9.66e-06	0.000163004	7.72e-06	2.50884e-05	6.1e-06	2.19449e-05	5.48e-06
MNP	0.706209	0.706211	1.76e-05	1.0024e-05	6.79e-07	1.48385e-05	7.04e-07	31.2384	0.819	0.000296649	1.61e-05	0.000404806	1.01e-05	2.9129e-05	6.08e-06	1.74114e-05	5.3e-06
STD	0.709209	1.00002	1.44e-05	1.56758e-05	7.48e-07	5.49147e-06	3.95e-07	13.2802	0.0699	0.00020674	9.97e-06	7.40679e-05	5.2e-06	6.6116e-06	5.6e-06	-1.35285e-05	4.95e-06
MNP	0.706188	0.706177	1.57e-05	2.93356e-05	9.27e-07	2.19839e-05	7.61e-07	11.9768	0.081	0.000352453	1.11e-05	0.000261547	8.41e-06	3.48736e-05	5.05e-06	2.72118e-05	5.51e-06
MNP	0.706194	0.706184	1.59e-05	2.36194e-05	7.28e-07	5.51585e-05	1.09e-06	15.5537	0.0572	0.000365147	1.12e-05	0.000848804	1.89e-05	1.84395e-05	6.43e-06	2.59975e-05	5.47e-06
MNP	0.706213	0.706202	1.39e-05	2.72063e-05	7.63e-07	1.07269e-05	4.4e-07	13.8212	0.0594	0.000378578	1.08e-05	0.00014653	6.18e-06	3.23292e-05	5.85e-06	1.87667e-05	5.81e-06
MNP	0.706153	0.706143	1.41e-05	2.85064e-05	8.42e-07	3.04435e-05	8.24e-07	13.0339	0.0569	0.000370436	1.08e-05	0.00040069	1.14e-05	1.70865e-05	6.58e-06	2.06579e-05	5.45e-06
STD	0.709233	1.00002	1.42e-05	1.67443e-05	8.44e-07	2.255e-06	5.45e-07	12.4438	0.116	0.000209063	1.04e-05	2.91543e-05	6.61e-06	-1.88934e-06	5.68e-06	-1.74842e-05	5.66e-06
MNP	0.706157	0.706146	1.49e-05	2.07131e-05	6.69e-07	2.0733e-05	9.9e-07	18.6539	0.218	0.000382083	1.28e-05	0.000365641	1.63e-05	3.15933e-05	5.92e-06	2.86665e-05	5.5e-06
MNP	0.706166	0.706154	1.22e-05	1.63188e-05	5.77e-07	4.12359e-05	9.85e-07	19.4356	0.0901	0.000318714	1.14e-05	0.000801093	2.08e-05	4.60114e-07	5.9e-06	3.48293e-06	5.75e-06
MNP	0.706186	0.706175	1.36e-05	1.51506e-05	5.95e-07	6.01666e-05	1.7e-06	20.9824	0.144	0.000313707	1.21e-05	0.00124109	3.67e-05	2.10383e-05	5.66e-06	6.28439e-06	5.58e-06
MNP	0.706148	0.706137	1.58e-05	1.70635e-05	6.9e-07	3.54859e-05	1.05e-06	20.2283	0.147	0.000339097	1.38e-05	0.000698167	1.98e-05	1.69946e-05	5.46e-06	-2.34942e-06	4.96e-06
STD	0.709211	0.999983	1.48e-05	1.60248e-05	7.09e-07	2.88269e-06	3.94e-07	13.0683	0.0548	0.000208575	9.15e-06	3.84159e-05	5.14e-06	7.42597e-06	5.28e-06	-7.74605e-06	5.84e-06
MNP	0.706164	0.706176	1.44e-05	1.84719e-05	6.81e-07	5.14093e-05	1.88e-06	17.2453	0.0982	0.000315838	1.16e-05	0.000879726	2.91e-05	3.59872e-06	5.94e-06	-4.4923e-06	4.87e-06
MNP	0.70614	0.706152	1.45e-05	1.57319e-05	5.88e-07	4.41494e-05	1.21e-06	21.8384	0.0894	0.000344455	1.27e-05	0.000954936	2.34e-05	2.02896e-05	5.62e-06	-8.98923e-06	5.08e-06
MNP	0.70615	0.706162	1.31e-05	2.04809e-05	7e-07	5.60929e-05	1.16e-06	17.9121	0.0647	0.000369323	1.24e-05	0.00100834	2.11e-05	2.01423e-05	5.57e-06	8.37223e-06	6.26e-06
MNP	0.70614	0.706152	1.66e-05	1.82493e-05	6.57e-07	8.42914e-05	2.29e-06	19.6819	0.0522	0.000354036	1.26e-05	0.00164525	4.42e-05	2.41791e-05	5.48e-06	9.472e-06	5.64e-06
STD	0.709185	0.999995	1.34e-05	1.70079e-05	7.1e-07	3.12289e-06	3.85e-07	13.2009	0.0443	0.000224052	9.3e-06	4.26505e-05	5.15e-06	2.83227e-06	4.99e-06	-9.64006e-06	5.51e-06
MNP	0.706153	0.706157	1.34e-05	1.88741e-05	6.76e-07	5.90987e-05	2.52e-06	14.5899	0.0341	0.000275248	9.76e-06	0.000868682	3.8e-05	9.05655e-06	5.83e-06	6.06219e-09	5.13e-06
MNP	0.706162	0.706165	1.28e-05	1.99937e-05	6.15e-07	3.27366e-05	1.17e-06	18.1256	0.0978	0.000362234	1.15e-05	0.000599867	2.11e-05	1.79803e-05	5.32e-06	9.2861e-06	5.02e-06
MNP	0.706169	0.706172	1.27e-05	2.1828e-05	6.46e-07	1.29728e-05	5.47e-07	17.19	0.0879	0.000372736	1.09e-05	0.000227189	9.71e-06	3.08088e-05	5.75e-06	1.01103e-05	5.58e-06
MNP	0.706203	0.706206	1.35e-05	1.89e-05	6.71e-07	4.12336e-05	1.6e-06	18.0466	0.0822	0.000344475	1.26e-05	0.000765534	3e-05	4.00137e-05	6.37e-06	6.41377e-06	5.95e-06
STD	0.709228	0.999995	1.53e-05	1.59349e-05	8.15e-07	4.4241e-06	4.89e-07	13.2875	0.0661	0.000211924	1.07e-05	5.90962e-05	6.42e-06	5.51017e-06	5.49e-06	-2.73929e-05	5.3e-06
MNP	0.706156	0.70616	1.69e-05	3.01109e-05	1.06e-06	3.08958e-05	1.43e-06	10.5381	0.0487	0.000317423	1.12e-05	0.000325051	1.53e-05	1.83096e-05	5.39e-06	8.60325e-07	4.96e-06
MNP	0.706172	0.706176	1.28e-05	2.58712e-05	5.92e-07	2.66556e-05	6.27e-07	18.1056	0.0732	0.000472229	1.11e-05	0.000482514	1.14e-05	5.13718e-05	5.56e-06	3.30079e-05	5.54e-06
MNP	0.70616	0.706163	1.29e-05	1.74514e-05	6.01e-07	3.55676e-05	1.18e-06	19.9011	0.0965	0.000343133	1.18e-05	0.000706962	2.3e-05	1.22331e-05	5.17e-06	-5.59467e-06	5.26e-06
MNP	0.706169	0.706173	1.18e-05	1.96067e-05	5.46e-07	4.10708e-05	1.5e-06	19.8871	0.0889	0.000391343	1.1e-05	0.000820582	2.74e-05	1.62179e-05	6.02e-06	4.8906e-06	5.5e-06
STD	0.709185	0.999996	1.57e-05	1.67774e-05	7.08e-07	3.65091e-06	4.16e-07	13.5882	0.0499	0.000230826	9.55e-06	5.07805e-05	5.7e-06	6.17388e-06	6.5e-06	-2.43292e-05	5.82e-06
MNP	0.706196	0.706199	1.4e-05	2.82389e-05	6.57e-07	1.15754e-05	3.74e-07	15.3422	0.0722	0.000434336	1.06e-05	0.000176896	5.6e-06	3.31548e-05	6.01e-06	3.81453e-05	5.6e-06
MNP	0.706232	0.706234	1.81e-05	4.29924e-05	1.81e-06	2.54625e-05	1.18e-06	8.24576	0.0623	0.000346744	1.46e-05	0.000207148	9.73e-06	1.17535e-05	6.84e-06	-1.33309e-06	5.86e-06
MNP	0.706142	0.706145	1.46e-05	2.10533e-05	7.18e-07	2.79239e-05	7.64e-07	16.7935	0.0836	0.000358007	1.25e-05	0.000477546	1.32e-05	1.92552e-05	5.82e-06	7.93086e-06	5.69e-06
MNP	0.706181	0.706184	1.29e-05	2.39801e-05	7.29e-07	4.94625e-05	1.96e-06	15.3692	0.0696	0.000369903	1.12e-05	0.000735136	2.74e-05	2.59846e-05	5.02e-06	3.0945e-05	5.85e-06
STD	0.709229		1.41e-05	1.81801e-05	8.64e-07	4.3532e-06	4.2e-07	13.5357	0.0443	0.000245959	1.16e-05	5.83401e-05	5.66e-06	-8.30842e-06	5.46e-06	1.79514e-06	4.32e-06
STD	0.709221	0.999999	1.44e-05	1.72188e-05	1.12e-06	6.36729e-06	4.55e-07	13.2209	0.0445	0.00023128	1.49e-05	8.26476e-05	5.97e-06	8.05335e-06	6.11e-06	1.2356e-05	5.22e-06
MNP	0.706206	0.706207	1.25e-05	2.39228e-05	5.96e-07	3.55672e-05	1.37e-06	18.0359	0.0785	0.00043196	1.07e-05	0.000621472	2.29e-05	5.26647e-05	5.16e-06	3.78924e-05	5.56e-06
MNP	0.706204	0.706205	1.29e-05	2.54179e-05	6.19e-07	3.18101e-05	2.09e-06	15.2923	0.0757	0.000389615	9.67e-06	0.000374861	1.63e-05	4.80359e-05	5.3e-06	2.48065e-05	5.41e-06
MNP	0.706202	0.706203	1.18e-05	3.22906e-05	6.37e-07	4.88423e-05	2.99e-06	15.8464	0.0822	0.000514377	1.03e-05	0.000776847	4.72e-05	7.19522e-05	5.51e-06	5.62981e-05	6.13e-06
MNP	0.706211	0.706212	1.37e-05	3.39996e-05	7.43e-07	3.35874e-05	9.11e-07	13.9177	0.0848	0.000473556	1.06e-05	0.000468552	1.25e-05	6.68906e-05	5.75e-06	5.00004e-05	6.04e-06
STD	0.709198	1.00002	1.21e-05	1.62622e-05	7.31e-07	3.60316e-06	4.32e-07	13.5109	0.0518	0.000220699	9.87e-06	4.99981e-05	5.91e-06	1.41767e-05	5.76e-06	1.50949e-05	5.28e-06
MNP	0.706192	0.706179	1.23e-05	2.95996e-05	6.52e-07	2.12477e-05	7.01e-07	15.5752	0.0705	0.000462047	1.04e-05	0.000329228	1.06e-05	6.023e-05	6.02e-06	3.32997e-05	5.89e-06
MNP	0.706197	0.706184	1.25e-05	2.35137e-05	8.17e-07	5.04788e-05	1.24e-06	17.5355	0.08	0.000406442	1.51e-05	0.000888704	2.25e-05	4.31449e-05	5.95e-06	4.09721e-05	5.36e-06
MNP	0.706203	0.70619	1.27e-05	2.23078e-05	6.28e-07	3.68137e-05	1.02e-06	17.3441	0.0989	0.000394624	1.18e-05	0.000630769	1.71e-05	3.44109e-05	5.66e-06	2.47833e-05	5.16e-06
MNP	0.706165	0.706151	1.15e-05	2.09396e-05	6.66e-07	3.60151e-05	9.67e-07	18.1188	0.0624	0.000381448	1.22e-05	0.000651763	1.78e-05	3.98252e-05	5.82e-06	2.5372e-05	6.74e-06
STD	0.709249	1.00002	1.56e-05	1.76401e-05	7.72e-07	4.05731e-06	4.76e-07	12.6963	0.0925	0.000217322	9.52e-06	5.35979e-05	6.14e-06	9.90042e-06	6.04e-06	2.27207e-06	5.21e-06
MNP	0.70619	0.706178	1.5e-05	3.07744e-05	7.9e-07	1.71013e-05	5.99e-07	12.4544	0.0548	0.000382259	1e-05	0.000213636	7.36e-06	3.70733e-05	6.09e-06	4.81378e-05	5.31e-06
MNP	0.706212	0.7062	1.52e-05	2.83429e-05	7.74e-07	1.86196e-05	6.27e-07	12.6394	0.0501	0.000357594	9.9e-06	0.000237704	7.84e-06	4.555e-05	6.1e-06	3.9982e-05	5.65e-06
MNP	0.706256	0.706244	1.4e-05	2.97346e-05	8.56e-07	1.404e-05	5.15e-07	12.4058	0.045	0.000368992	1.07e-05	0.000174515	6.48e-06	4.5838e-05	5.6e-06	2.05594e-05	6.28e-06
MNP	0.706171	0.706159	1.31e-05	2.57262e-05	6.97e-07	1.95187e-05	7.56e-07	13.8227	0.0598	0.000355914	9.49e-06	0.000270397	1.04e-05	1.92796e-05	5.73e-06	6.33843e-06	5.55e-06
STD	0.709195	1	1.68e-05	1.6617e-05	6.75e-07	5.38065e-06	3.86e-07	13.3769	0.0461	0.000223482	9.16e-06	7.15674e-05	5.16e-06	-8.7312e-06	5.35e-06	-2.86237e-05	5.31e-06
MNP	0.70616	0.706158	1.41e-05	2.19505e-05	6.78e-07	4.54345e-05	1.16e-06	15.9049	0.057	0.000347303	1.07e-05	0.00073592	2.03e-05	3.42606e-05	5.38e-06	-2.69169e-05	6.36e-06
MNP	0.70615	0.706147	1.19e-05	1.91407e-05	5.95e-07	8.4797e-06	3.3e-07	19.2972	0.0833	0.000364607	1.12e-05	0.000162413	6.32e-06	3.07982e-05	5.65e-06	-1.4245e-05	5.56e-06
MNP	0.706167	0.706164	1.43e-05	1.82342e-05	5.73e-07	1.7441e-05	4.32e-07	20.3382	0.113	0.000365235	1.16e-05	0.000358317	9.03e-06	4.367e-06	5.5e-06	-1.64784e-05	5.84e-06
MNP	0.706173	0.70617	1.27e-05	2.2814e-05	6.43e-07	9.78603e-06	4.89e-07	16.8409	0.0557	0.000387161	1.12e-05	0.000163493	7.91e-06	2.00221e-05	6.45e-06	-1.23243e-05	5.85e-06
STD	0.70923	1.00003	1.6e-05	1.59269e-05	9.34e-07	5.29997e-06	4.66e-07	12.6623	0.0458	0.000199116	1.17e-05	6.64336e-05	5.86e-06	-3.76803e-06	5.63e-06	-2.44309e-05	5.12e-06
MNP	0.706217	0.706196	1.31e-05	2.47376e-05	6.29e-07	2.10577e-05	5.96e-07	16.4991	0.0843	0.00040976	1.05e-05	0.000343509	9.07e-06	3.45109e-05	5.11e-06	-1.21985e-06	6e-06
MNP	0.706156	0.706136	1.45e-05	1.66702e-05	6.74e-07	4.68135e-05	2.28e-06	19.2576	0.0733	0.000313545	1.29e-05	0.00090176	4.35e-05	1.55758e-06	6.26e-06	4.20997e-06	5.9e-06
MNP	0.706131	0.70611	1.18e-05	1.60606e-05	5.38e-07	4.34491e-05	1.59e-06	19.7165	0.101	0.000316874	1.08e-05	0.00084377	3.17e-05	1.66471e-05	5.31e-06	-2.74634e-06	5.72e-06
MNP	0.706185	0.706165	1.41e-05	1.6704e-05	5.78e-07	6.4895e-05	1.41e-06	20.9765	0.167	0.000345761	1.21e-05	0.00134856	2.58e-05	2.56659e-05	5.26e-06	9.2925e-06	5.46e-06
STD	0.709231	1.00001	1.2e-05	1.70619e-05	7.52e-07	4.9898e-06	4.01e-07	13.3248	0.0466	0.00022727	1e-05	6.62503e-05	5.39e-06	-1.01619e-05	4.84e-06	-3.05396e-06	5.3e-06
MNP	0.70619	0.706183	1.24e-05	3.11221e-05	7.79e-07	9.08553e-06	3.99e-07	13.1961	0.0695	0.000414961	1.08e-05	0.000119363	5.3e-06	2.14887e-05	5.14e-06	1.11106e-05	5.87e-06
MNP	0.706182	0.706175	1.42e-05	2.94163e-05	7.17e-07	1.24686e-05	5.59e-07	13.169	0.0614	0.000381301	9.08e-06	0.000160371	6.93e-06	4.47795e-05	5.29e-06	-2.00884e-06	5.97e-06
MNP	0.706182	0.706175	1.34e-05	3.07667e-05	7.84e-07	1.50701e-05	5.18e-07	12.7051	0.0679	0.000387163	9.92e-06	0.000191148	6.67e-06	4.79912e-05	5.57e-06	5.20101e-06	6.36e-06
MNP	0.706191	0.706184	1.4e-05	2.45587e-05	6.33e-07	9.05654e-06	4.49e-07	15.715	0.065	0.000387833	1.05e-05	0.000144434	7.13e-06	2.66992e-05	5.73e-06	-7.12518e-07	6.51e-06
STD	0.709203	0.999994	1.47e-05	1.59156e-05	7.62e-07	3.70208e-06	4.79e-07	13.2628	0.0483	0.00021255	1.01e-05	4.96827e-05	6.42e-06	-1.06062e-06	5.27e-06	-2.33416e-05	5.9e-06
MNP	0.70617	0.706175	1.26e-05	2.30635e-05	6.12e-07	1.26725e-05	4.21e-07	17.4484	0.0767	0.000404114	1.1e-05	0.000224349	7.71e-06	2.86861e-05	6.12e-06	-1.32465e-05	5.38e-06
MNP	0.706194	0.706199	1.25e-05	2.46245e-05	5.67e-07	5.98036e-06	3.4e-07	15.9524	0.0676	0.000389578	8.74e-06	9.38421e-05	5.3e-06	3.68407e-05	5.7e-06	-1.58853e-05	6.44e-06
MNP	0.706187	0.706191	1.52e-05	2.92158e-05	7.77e-07	6.92251e-06	4.04e-07	12.6242	0.0443	0.00036477	9.94e-06	8.61626e-05	5.05e-06	2.10401e-05	5.91e-06	-9.21991e-06	5.88e-06
MNP	0.70618	0.706184	1.47e-05	3.05357e-05	7.54e-07	7.93358e-06	4.19e-07	12.6708	0.0383	0.000391355	9.54e-06	0.000100898	5.33e-06	3.37267e-05	5.64e-06	-2.37373e-05	6.66e-06
STD	0.709207	1.00002	1.47e-05	1.78915e-05	8.1e-07	3.47838e-06	4.62e-07	12.4902	0.0553	0.00022037	1e-05	4.42283e-05	5.86e-06	3.63067e-06	5.52e-06	-1.0705e-05	5.46e-06
MNP	0.706185	0.706169	1.52e-05	3.00365e-05	7.45e-07	8.49616e-06	5.53e-07	13.6335	0.0612	0.000402761	1.02e-05	0.000117182	7.54e-06	1.65936e-05	5.42e-06	-1.06566e-06	6.22e-06
MNP	0.70617	0.706154	1.28e-05	2.64431e-05	7.45e-07	6.68852e-06	3.85e-07	14.5928	0.0353	0.000384222	1.09e-05	9.91539e-05	5.71e-06	2.56171e-05	6.43e-06	1.57586e-06	5.84e-06
MNP	0.706177	0.706161	1.3e-05	2.53572e-05	6.69e-07	1.13451e-05	3.65e-07	16.0352	0.0793	0.000406004	1.06e-05	0.000182056	5.85e-06	3.42171e-05	5.6e-06	7.56813e-08	5.75e-06
MNP	0.706194	0.706178	1.23e-05	2.60758e-05	6.7e-07	5.24784e-06	3.82e-07	15.3974	0.0528	0.000403307	1.02e-05	8.22726e-05	5.93e-06	1.31893e-05	5e-06	-1.15498e-05	6.27e-06
STD	0.709245	1.00003	1.57e-05	2.0258e-05	9.48e-07	5.95427e-06	5.25e-07	11.0941	0.166	0.000222837	1.1e-05	6.3518e-05	5.61e-06	-1.07035e-05	5.38e-06	-2.97378e-05	5.18e-06
MNP	0.706218	0.706199	1.2e-05	2.37446e-05	6.46e-07	5.63576e-06	3.39e-07	16.5103	0.0838	0.000393708	1.02e-05	9.3866e-05	5.46e-06	2.81673e-05	6.24e-06	-3.15974e-06	5.77e-06
MNP	0.706187	0.706167	1.89e-05	3.65108e-05	1.18e-06	1.33141e-05	9.31e-07	9.9781	0.165	0.000351598	9.02e-06	0.00012727	7.16e-06	2.87594e-05	5.96e-06	-2.38726e-05	6.8e-06
MNP	0.706193	0.706173	2.29e-05	3.63267e-05	1.39e-06	1.39499e-05	8.81e-07	9.60266	0.252	0.00034376	1.16e-05	0.000120959	5.98e-06	3.6292e-05	5.5e-06	-1.61553e-05	7.58e-06
MNP	0.706172	0.706153	1.52e-05	3.88995e-05	9.38e-07	1.03276e-05	5.56e-07	10.7858	0.0511	0.000418513	9.78e-06	0.00011361	6.08e-06	3.04515e-05	5.83e-06	8.98756e-06	6.77e-06
STD	0.709214	1.00001	1.53e-05	1.69188e-05	9.39e-07	3.11655e-06	4.02e-07	13.656	0.0342	0.000229997	1.28e-05	4.30278e-05	5.49e-06	-4.31607e-06	6.71e-06	-1.24886e-05	5.72e-06
MNP	0.706233	0.706223	1.35e-05	3.6488e-05	8.43e-07	9.89018e-06	5.18e-07	11.6444	0.0457	0.000425077	9.97e-06	0.000113179	6.08e-06	5.44251e-05	6.6e-06	3.28877e-06	6.37e-06
MNP	0.706171	0.706162	1.45e-05	3.29759e-05	1.23e-06	7.70961e-06	4.3e-07	12.7186	0.0357	0.00041691	1.55e-05	9.74762e-05	5.54e-06	3.11697e-05	6.01e-06	-1.18288e-05	7.17e-06
MNP	0.706205	0.706195	1.3e-05	3.05749e-05	7.09e-07	9.08406e-06	3.84e-07	14.3566	0.0588	0.000438132	1.02e-05	0.00013024	5.47e-06	3.86078e-05	5.73e-06	-8.48448e-07	5.96e-06
MNP	0.706191	0.706181	1.57e-05	2.51493e-05	7.05e-07	8.50618e-06	4.31e-07	15.1046	0.0861	0.0003873	1.1e-05	0.00012708	6.57e-06	3.22524e-05	5.72e-06	-2.50584e-05	7.55e-06
STD	0.709226	1.00003	1.82e-05	1.79007e-05	9.48e-07	6.19501e-06	4.91e-07	11.781	0.0853	0.00020853	1.14e-05	7.24599e-05	6.01e-06	-1.67094e-05	6.16e-06	-2.95255e-05	4.85e-06
MNP	0.706203	0.706179	1.32e-05	3.30566e-05	8.33e-07	1.13409e-05	4.19e-07	13.4018	0.0617	0.000439209	1.12e-05	0.000151076	5.56e-06	3.82578e-05	5.33e-06	5.01684e-06	5.39e-06
MNP	0.706196	0.706173	1.5e-05	2.60532e-05	6.36e-07	7.19668e-06	3.82e-07	14.0956	0.076	0.000362727	9.01e-06	0.000103237	5.49e-06	3.49445e-05	6.3e-06	1.07902e-05	6.44e-06
MNP	0.706203	0.70618	1.41e-05	3.43694e-05	9.24e-07	1.07436e-05	5.11e-07	11.0447	0.0437	0.000383459	1.04e-05	0.000117767	5.67e-06	4.56361e-05	5.9e-06	7.89114e-06	6.54e-06
MNP	0.706207	0.706184	1.48e-05	3.30116e-05	7.43e-07	8.90887e-06	4.28e-07	11.4211	0.0459	0.000377273	8.97e-06	0.00010152	4.72e-06	5.19954e-05	5.09e-06	6.38326e-06	7.68e-06
STD	0.709241	1.00005	1.57e-05	1.81539e-05	7.75e-07	1.89969e-06	4.51e-07	13.1898	0.0518	0.000237116	1.01e-05	2.42386e-05	5.88e-06	1.40738e-05	6.39e-06	-1.15744e-05	5.76e-06
MNP	0.706211	0.706177	1.33e-05	2.6514e-05	6.14e-07	4.18846e-05	1.84e-06	15.9383	0.0507	0.000424159	1.01e-05	0.000648122	2.67e-05	5.99913e-05	5.23e-06	2.15464e-05	6.47e-06
MNP	0.706221	0.706188	1.3e-05	2.62858e-05	7.38e-07	3.02613e-05	7.72e-07	15.1961	0.0815	0.000399487	1.14e-05	0.000455227	1.16e-05	5.33732e-05	5.55e-06	1.73967e-05	5.6e-06
MNP	0.706189	0.706156	1.22e-05	2.67293e-05	6.22e-07	3.42991e-05	1.17e-06	16.6819	0.0692	0.00044384	1.04e-05	0.000568156	1.9e-05	5.91671e-05	5.99e-06	2.02204e-05	6.77e-06
MNP	0.706195	0.706162	1.26e-05	2.99888e-05	7.37e-07	1.93127e-05	4.69e-07	15.5156	0.0775	0.000465192	1.15e-05	0.000293581	7.43e-06	5.06456e-05	5.27e-06	2.47931e-05	6.69e-06
STD	0.709246	1.00004	1.22e-05	1.85857e-05	7.12e-07	8.52182e-06	3.98e-07	13.4612	0.0479	0.000251069	9.62e-06	0.000114914	5.39e-06	-3.2756e-08	5.84e-06	-9.3859e-06	5.45e-06
MNP	0.706219	0.706193	1.57e-05	3.23507e-05	6.75e-07	3.66003e-05	1.31e-06	14.8994	0.0872	0.00047945	1.04e-05	0.000530689	1.71e-05	4.36082e-05	5.55e-06	1.09887e-05	5.94e-06
MNP	0.706211	0.706184	1.31e-05	2.94161e-05	7.26e-07	6.59033e-05	2.46e-06	14.7407	0.0839	0.000431748	1.06e-05	0.000990931	4.1e-05	4.18561e-05	6.14e-06	1.43933e-05	7e-06
MNP	0.706206	0.706179	1.39e-05	2.95407e-05	7.86e-07	7.24789e-05	2.59e-06	16.0158	0.121	0.000474868	1.3e-05	0.00115109	3.67e-05	5.22151e-05	5.78e-06	-1.99001e-06	6.62e-06
MNP	0.7062	0.706173	1.37e-05	3.56416e-05	7.97e-07	3.01569e-05	7.09e-07	12.8761	0.0878	0.000461713	1.07e-05	0.0003988	9.65e-06	5.75618e-05	5.84e-06	-9.16632e-06	7.24e-06
STD	0.709228	1.00001	1.43e-05	1.52021e-05	8.49e-07	5.33071e-06	4.5e-07	13.1622	0.0682	0.000198094	1.11e-05	7.10702e-05	6.03e-06	2.2236e-06	5.48e-06	-1.69007e-05	5.15e-06
MNP	0.706197	0.706189	1.23e-05	3.13125e-05	6.63e-07	3.30322e-05	9.25e-07	15.3285	0.071	0.000476987	1.01e-05	0.000498116	1.44e-05	5.44981e-05	5.22e-06	1.63919e-05	6.89e-06
MNP	0.706228	0.70622	1.6e-05	3.04497e-05	7.67e-07	2.7631e-05	6.5e-07	16.1379	0.0646	0.00048687	1.23e-05	0.000434386	9.07e-06	4.64985e-05	5.69e-06	-2.90305e-06	6.52e-06
MNP	0.706188	0.706181	1.23e-05	2.86158e-05	6.9e-07	1.5352e-05	4.76e-07	15.5447	0.0542	0.000446188	1.08e-05	0.00023998	7.53e-06	5.39684e-05	5.34e-06	-7.06025e-06	6.57e-06
MNP	0.706257	0.706249	1.49e-05	3.01719e-05	8.29e-07	1.49959e-05	4.9e-07	14.4865	0.121	0.000433469	1.21e-05	0.000215899	6.65e-06	4.06656e-05	5.87e-06	-1.60164e-05	7.76e-06
STD	0.709207	1.00002	1.55e-05	1.66492e-05	6.64e-07	6.42297e-06	4.07e-07	13.4273	0.0539	0.000223673	8.98e-06	8.36523e-05	5.45e-06	-1.03771e-05	5.48e-06	-1.50501e-05	5.75e-06
MNP	0.706218	0.706205	1.57e-05	3.02629e-05	7.34e-07	3.79868e-05	1.5e-06	14.3113	0.0522	0.000434233	1.04e-05	0.000547591	2.22e-05	4.15916e-05	5.4e-06	9.63285e-06	5.89e-06
MNP	0.70621	0.706197	1.29e-05	2.64661e-05	7.01e-07	1.97464e-05	5.62e-07	15.9311	0.0714	0.000422097	1.15e-05	0.000311503	8.89e-06	3.82788e-05	5.91e-06	-2.1788e-05	7.66e-06
MNP	0.706234	0.706221	1.57e-05	3.10377e-05	9.21e-07	2.77717e-05	6.72e-07	12.2964	0.0422	0.000383796	1.16e-05	0.000341158	8.33e-06	2.49385e-05	5.2e-06	-1.49398e-05	7.08e-06
MNP	0.706216	0.706203	1.25e-05	2.35212e-05	6.64e-07	1.95854e-05	6.64e-07	16.5239	0.0783	0.000389175	1.11e-05	0.000318004	1.04e-05	3.11751e-05	5.33e-06	-3.85434e-05	7.03e-06
STD	0.709239	1.00003	1.65e-05	1.76673e-05	8.25e-07	5.08244e-06	4.4e-07	12.5888	0.0927	0.000216014	9.93e-06	5.99357e-05	5.42e-06	-1.394e-06	5.85e-06	-1.62841e-05	4.93e-06
MNP	0.706211	0.706191	1.57e-05	2.78241e-05	7.72e-07	2.97895e-05	7.6e-07	14.2618	0.079	0.00039608	1.06e-05	0.000423831	9.94e-06	3.14158e-05	5.79e-06	-3.42131e-06	7.6e-06
MNP	0.706228	0.706208	1.46e-05	2.95425e-05	7.62e-07	4.35681e-05	1.69e-06	13.0018	0.0723	0.000392485	1.05e-05	0.000572867	2.37e-05	1.56756e-05	5.32e-06	-2.07102e-05	7.69e-06
MNP	0.706227	0.706207	1.37e-05	2.32205e-05	7.35e-07	2.58875e-05	8.68e-07	16.1168	0.0845	0.000372688	1.19e-05	0.000413682	1.43e-05	3.00284e-05	5.78e-06	-1.53734e-05	8.21e-06
MNP	0.706214	0.706194	1.32e-05	2.83812e-05	7.01e-07	2.46313e-05	7.07e-07	13.5571	0.0619	0.000385229	9.49e-06	0.000332381	9.18e-06	2.81103e-05	5.94e-06	2.11937e-06	8.03e-06
STD	0.709221		1.2e-05	1.64791e-05	7.3e-07	4.56307e-06	4.34e-07	13.3575	0.058	0.000218324	9.69e-06	6.23426e-05	5.68e-06	-5.38074e-06	6.07e-06	-8.12657e-06	4.49e-06

## Sheet: BDL
SampleName	'87Sr/86Sr_Corr'	SE	'84Kr/88Sr'	SE	'85Rb/88Sr'	SE	'88 Intens'	SE	'Kr84 (V)'	SE	'Rb85 (V)'	SE	'167Er2'	SE	'173Yb2'	SE
BDL	0.705403	2.98e-05	2.35913e-05	3.05e-06	6.67375e-05	2.07e-06	3.20459	0.00328	7.50962e-05	9.7e-06	0.000212817	6.58e-06	1.01755e-05	5.02e-06	1.2188e-05	6.17e-06
BDL	0.705334	2.65e-05	1.59971e-05	2.37e-06	1.13095e-05	2.12e-06	3.25169	0.00379	5.19127e-05	7.71e-06	3.68139e-05	6.9e-06	-6.47465e-06	5.76e-06	9.04832e-06	5.6e-06
BDL	0.70534	3e-05	1.3789e-05	2.69e-06	0.000163862	2.7e-06	3.16457	0.0021	4.34936e-05	8.52e-06	0.000518969	8.67e-06	-5.48176e-06	5.77e-06	4.65447e-06	5.41e-06
BDL	0.705369	2.62e-05	9.89062e-06	2.79e-06	3.79108e-05	1.78e-06	3.52148	0.00224	3.49316e-05	9.83e-06	0.00013354	6.29e-06	-3.51791e-06	6.86e-06	2.89633e-05	6.35e-06
BDL	0.705355	2.82e-05	1.11771e-05	2.91e-06	2.03186e-05	1.94e-06	3.12729	0.0026	3.64203e-05	9.19e-06	6.3409e-05	6.05e-06	-6.49987e-06	6.25e-06	7.75572e-06	5.31e-06
BDL	0.705402	2.86e-05	1.08034e-05	2.4e-06	0.000183315	2.53e-06	3.44949	0.00284	3.73487e-05	8.3e-06	0.000634964	8.95e-06	-1.04753e-06	6.13e-06	2.1916e-05	5.8e-06
BDL	0.705322	3.63e-05	4.46515e-06	3.16e-06	0.000110454	2.52e-06	2.5816	0.00751	1.26935e-05	7.92e-06	0.00027995	6.05e-06	9.52716e-06	5.48e-06	2.07563e-05	5.81e-06
BDL	0.705341	2.83e-05	-1.91427e-06	2.59e-06	1.68452e-05	1.69e-06	3.3063	0.00347	-6.47498e-06	8.56e-06	5.55726e-05	5.59e-06	-4.25755e-06	6.01e-06	1.46406e-05	6.08e-06
BDL	0.705279	4.05e-05	-4.90352e-06	4e-06	2.32347e-05	2.55e-06	2.11519	0.00191	-1.22038e-05	8.37e-06	4.92206e-05	5.4e-06	-9.83526e-06	5.74e-06	1.20602e-05	5.67e-06
BDL	0.705334	3.39e-05	-6.65551e-07	2.63e-06	1.9481e-05	2.05e-06	3.34633	0.00315	-2.09375e-06	8.8e-06	6.51361e-05	6.87e-06	-3.02324e-06	5.16e-06	1.13045e-05	6.48e-06
BDL	0.705346	2.04e-05	-3.06958e-06	1.92e-06	5.73061e-05	1.25e-06	4.83206	0.0103	-1.62165e-05	9.2e-06	0.000275466	5.95e-06	5.86287e-06	5.77e-06	2.41659e-05	5.99e-06
BDL	0.705345	2.92e-05	-1.00932e-05	3.21e-06	1.68423e-05	1.83e-06	3.04995	0.00213	-3.07901e-05	9.78e-06	5.03467e-05	5.65e-06	6.75327e-06	5.85e-06	4.92729e-06	5.29e-06
BDL	0.705353	3.11e-05	-1.63583e-05	2.7e-06	6.90184e-05	2.08e-06	2.77199	0.00255	-4.53542e-05	7.47e-06	0.000190191	5.73e-06	2.05933e-06	5.42e-06	2.53731e-05	5.42e-06
	0.705348	6.39351e-05
